# Supplementary material for: Spodium bonding to anticrown-Hg3boosts phosphorescence of cyclometalated-PtIIcomplexes
Source: Royal Society of Chemistry journal article supplement (doi:10.1039/d2qi02047e), 2022-11-22
Supplement: d2qi02047e1.pdf [file d2qi02047e1.pdf]

## ELECTRONIC SUPPLEMENTARY MATERIALS

### **Spodium Bonding to Anticrown-Hg<sub>3</sub> Boosts Phosphorescence of Cyclometalated-Pt<sup>II</sup> Complexes**

Anton V. Rozhkov,<sup>1</sup> Eugene A. Katlenok,<sup>1</sup> Margarita V. Zhmykhova,<sup>1</sup> Maxim L. Kuznetsov,<sup>2</sup>  
Victor N. Khrustalev,<sup>3,4</sup> Kirill I. Tugashov,<sup>5</sup> Nadezhda A. Bokach,<sup>1</sup> Vadim Yu. Kukushkin\*<sup>1,6</sup>

<sup>1</sup>*Institute of Chemistry, Saint Petersburg State University, Universitetskaya Nab. 7/9, 199034  
Saint Petersburg, Russian Federation; e-mail: [v.kukushkin@spbu.ru](mailto:v.kukushkin@spbu.ru)*

<sup>2</sup>*Centro de Química Estrutural, Institute of Molecular Sciences, Departamento de Engenharia  
Química, Instituto Superior Técnico, Universidade de Lisboa, Av. Rovisco Pais, 1049–001  
Lisboa, Portugal*

<sup>3</sup>*Peoples' Friendship University of Russia (RUDN University), Miklukho-Maklay Street, 6,  
117198 Moscow, Russian Federation*

<sup>4</sup>*N.D. Zelinsky Institute of Organic Chemistry, Russian Academy of Sciences, Leninsky Prospekt,  
47, 119991 Moscow, Russian Federation*

<sup>5</sup>*A.N. Nesmeyanov Institute of Organoelement Compounds, Russian Academy of Sciences,  
Vavilov Street, 28, 119991 Moscow, Russian Federation*

<sup>6</sup>*Laboratory of Crystal Engineering of Functional Materials, South Ural State University, 76,  
Lenin Av., 454080 Chelyabinsk, Russian Federation*

## Contents

|                                                                                        |    |
|----------------------------------------------------------------------------------------|----|
| <b>Crystal data and structure refinement</b> .....                                     | 3  |
| XRD structures .....                                                                   | 3  |
| Powder XRD data for of (1-5)·Hg <sub>3</sub> .....                                     | 11 |
| <b>The Cambridge Structural Database (CSD) search for Short Hg··Pt contacts</b> .....  | 14 |
| <b>Theoretical considerations</b> .....                                                | 19 |
| Theoretical background of radiative and nonradiative rate constants calculations ..... | 33 |
| Cartesian coordinates for the studied molecules .....                                  | 36 |
| Cartesian coordinate for [1·Hg <sub>3</sub> ] <sup>a</sup> (in Å) .....                | 36 |
| Cartesian coordinate for [1·Hg <sub>3</sub> ] <sup>b</sup> (in Å) .....                | 38 |
| Cartesian coordinate for <sup>3</sup> M1·Hg <sub>3</sub> (in Å) .....                  | 40 |
| Cartesian coordinate for <sup>3</sup> M2·Hg <sub>3</sub> (in Å) .....                  | 41 |
| Cartesian coordinate for S <sub>0</sub> (3·Hg <sub>3</sub> ) (in Å) .....              | 42 |
| Cartesian coordinate for T <sub>1</sub> (3·Hg <sub>3</sub> ) (in Å) .....              | 44 |
| Cartesian coordinate for S <sub>0</sub> (3) (in Å) .....                               | 46 |
| Cartesian coordinate for T <sub>1</sub> (3) (in Å) .....                               | 47 |
| Cartesian coordinate for Hg <sub>3</sub> (in Å) .....                                  | 48 |
| Cartesian coordinate for MC (3·Hg <sub>3</sub> ) (in Å) .....                          | 49 |
| Cartesian coordinate for <sup>3</sup> MC (3) (in Å) .....                              | 51 |
| Cartesian coordinate for MECP (3) (in Å) .....                                         | 52 |
| Cartesian coordinate for MECP (3·Hg <sub>3</sub> ) (in Å) .....                        | 53 |
| <b>References</b> .....                                                                | 55 |

## Crystal data and structure refinement

### XRD structures

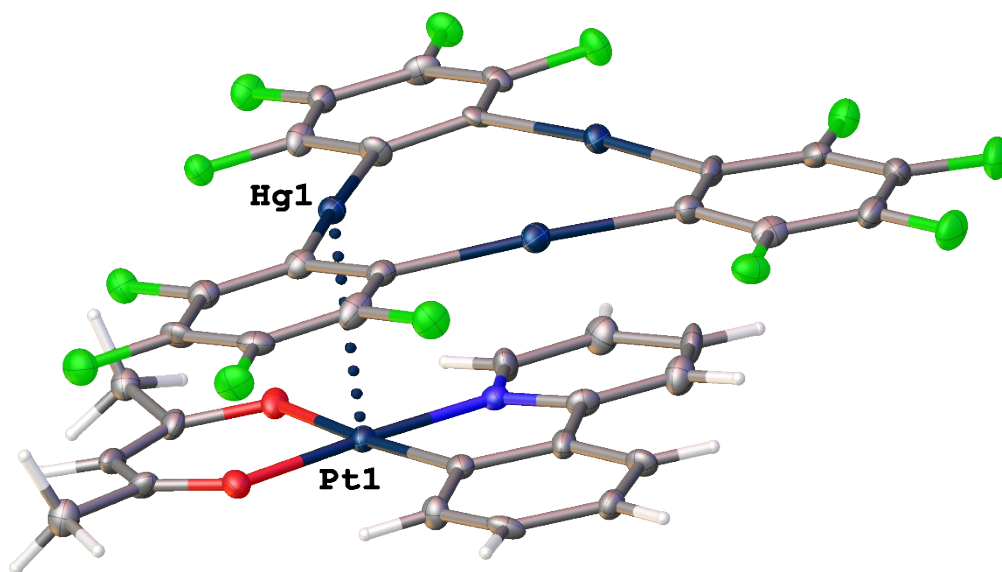

**Figure S1.** View of the molecular structure of  $1 \cdot \text{Hg}_3$ ; thermal ellipsoids are shown with the 50% probability.

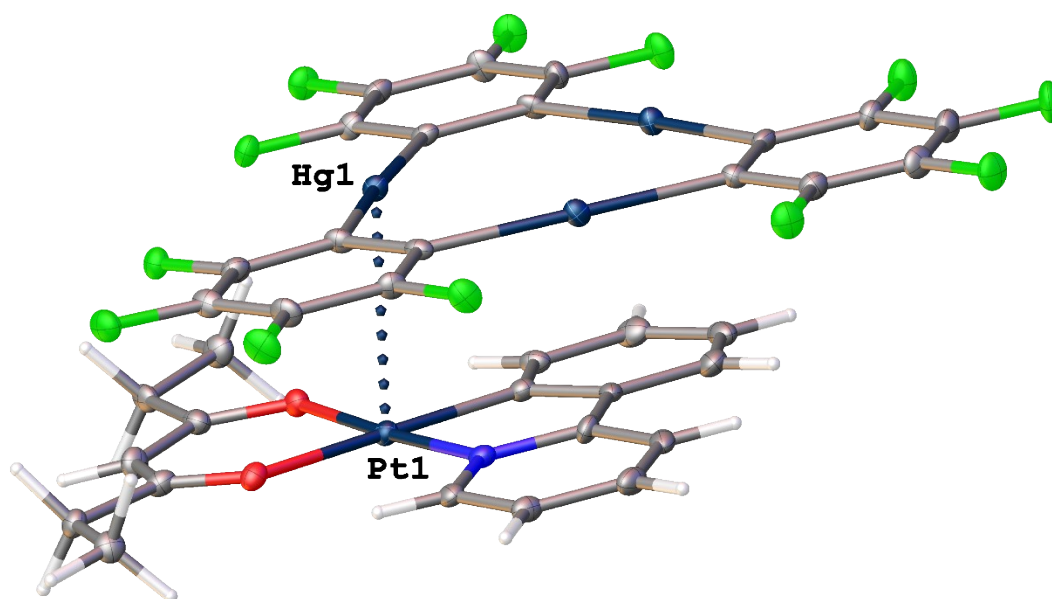

**Figure S2.** View of the molecular structure of  $2 \cdot \text{Hg}_3$ ; thermal ellipsoids are shown with the 50% probability.

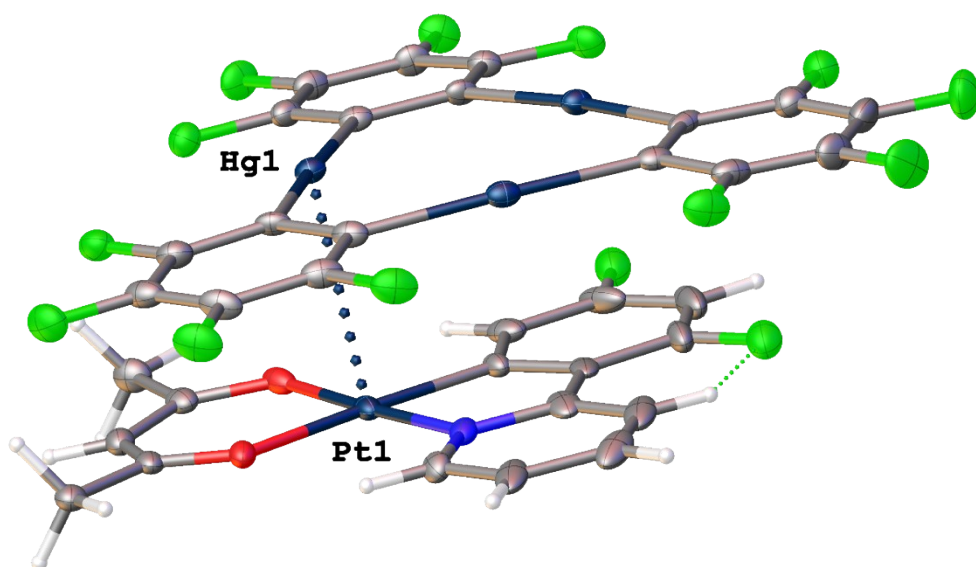

**Figure S3.** View of the molecular structure of  $4 \cdot \text{Hg}_3$ ; thermal ellipsoids are shown with the 50% probability.

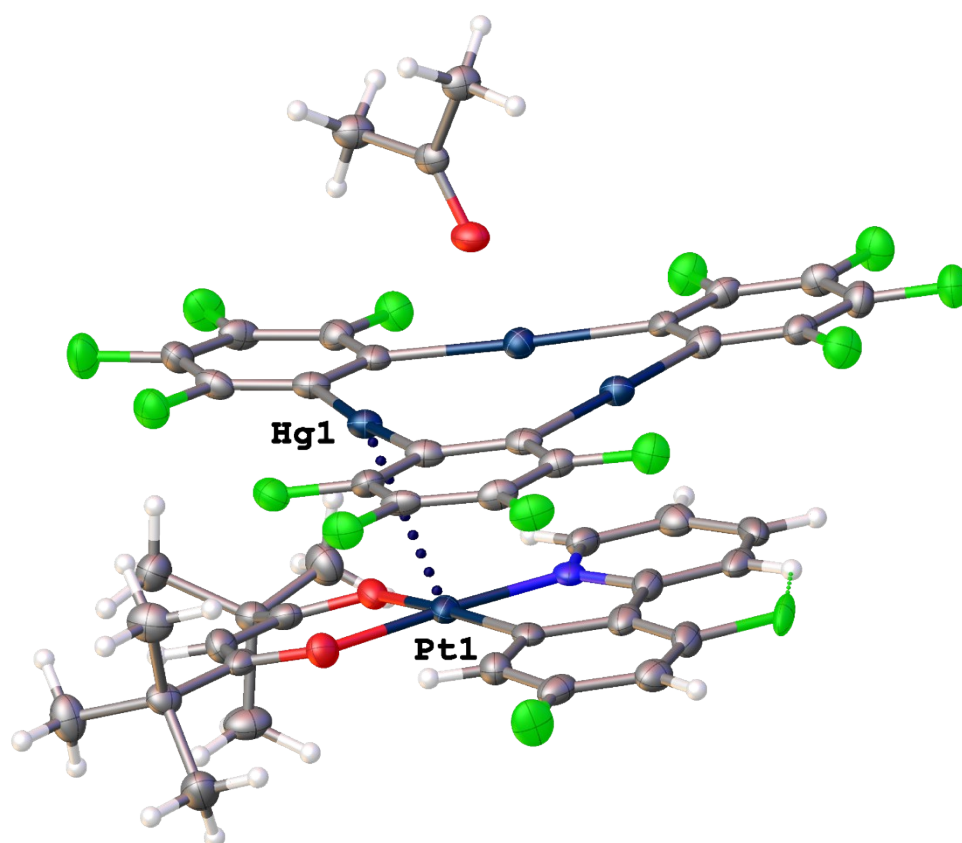

**Figure S4.** View of the molecular structure of  $5 \cdot \text{Hg}_3 \cdot \text{Me}_2\text{CO}$ ; thermal ellipsoids are shown with the 50% probability.

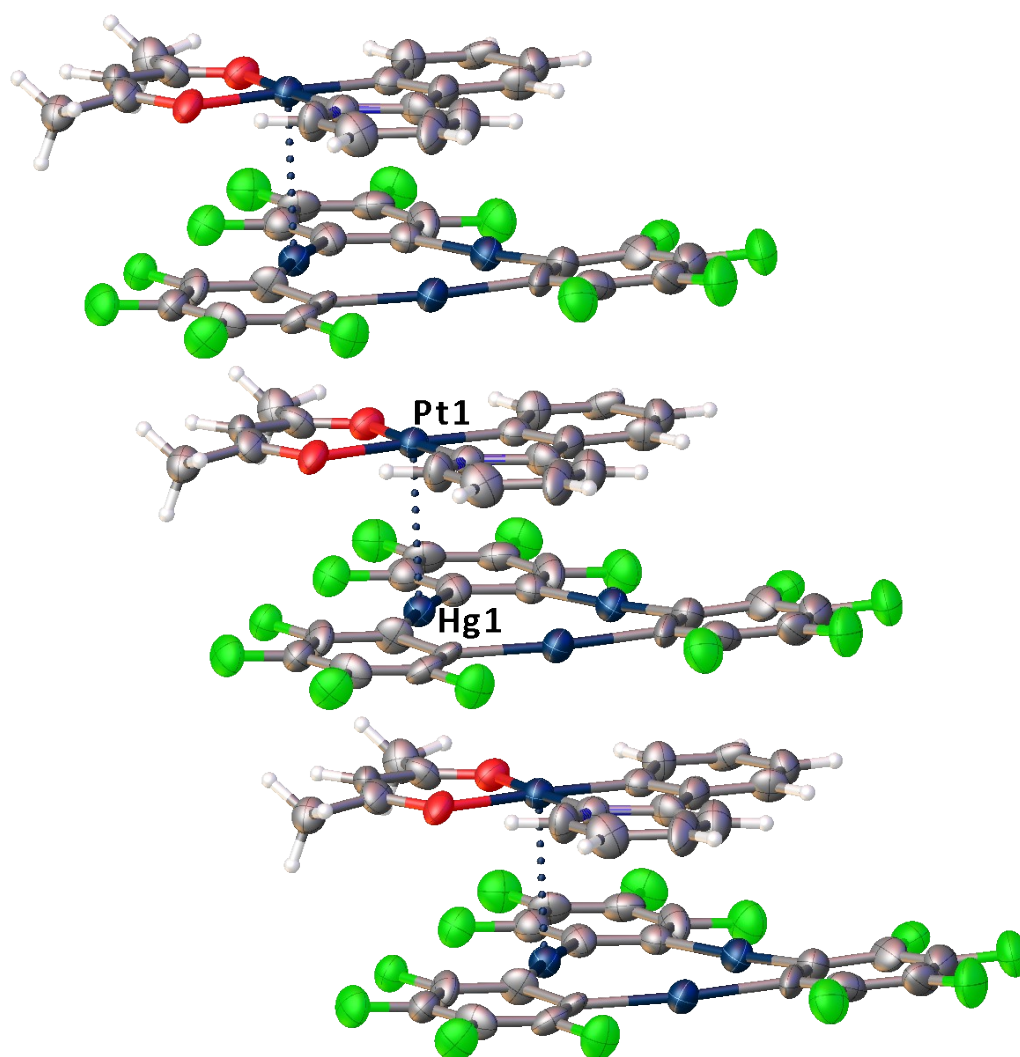

**Figure S5.** A fragment of crystal packing for  $1 \cdot \text{Hg}_3$ , demonstrating heteropolar stacking between **1** and  $\text{Hg}_3$ . Short contacts  $\text{Hg} \cdots \text{Pt}$  are given by dotted lines.

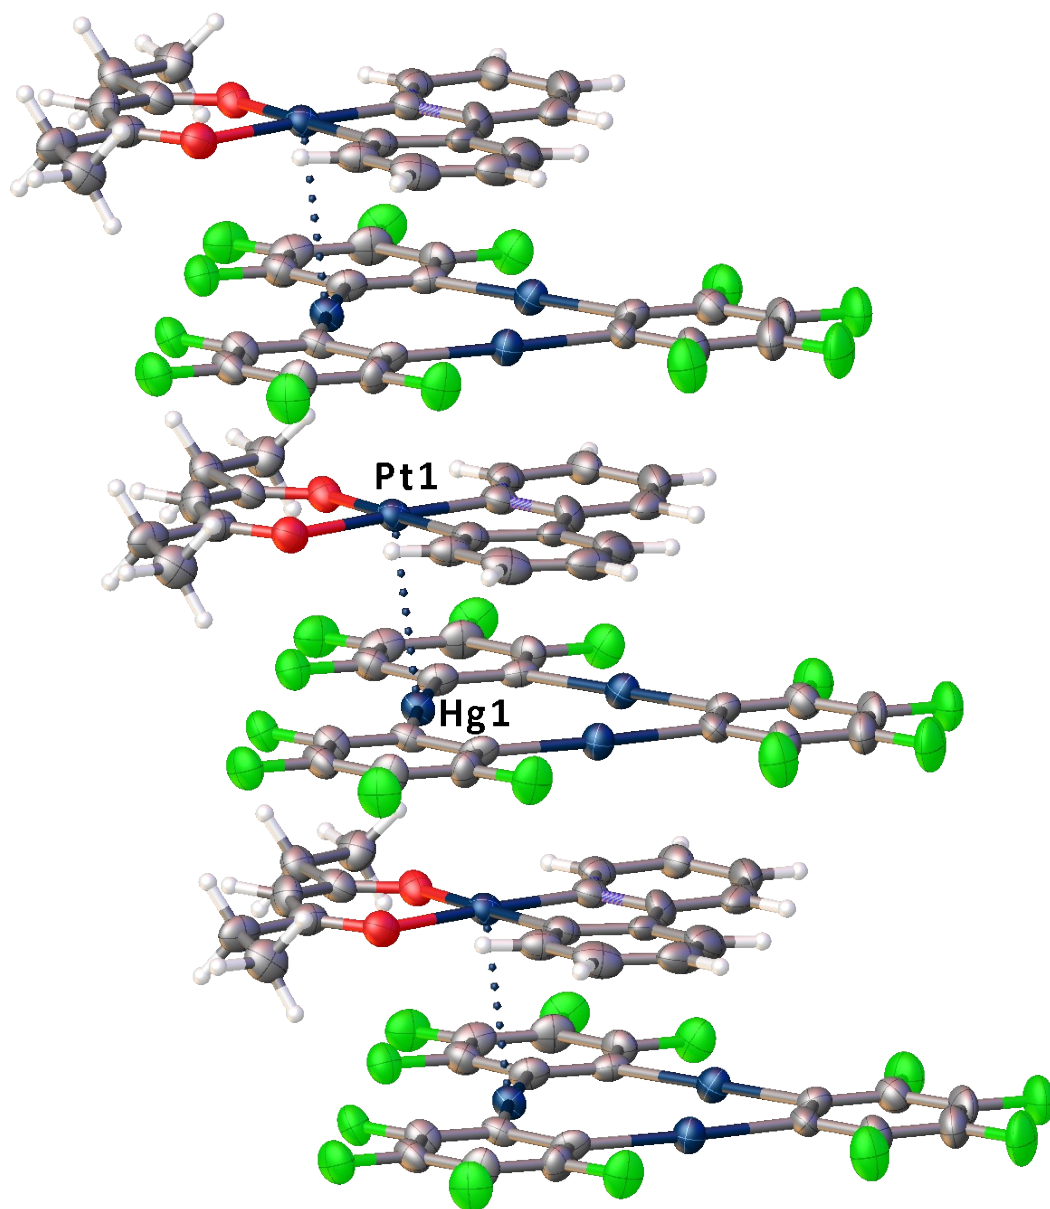

**Figure S6.** A fragment of crystal packing for  $2 \cdot \text{Hg}_3$  demonstrating heteropolar stacking between **2** and **Hg<sub>3</sub>**. Short contacts  $\text{Hg} \cdots \text{Pt}$  are given by dotted lines.

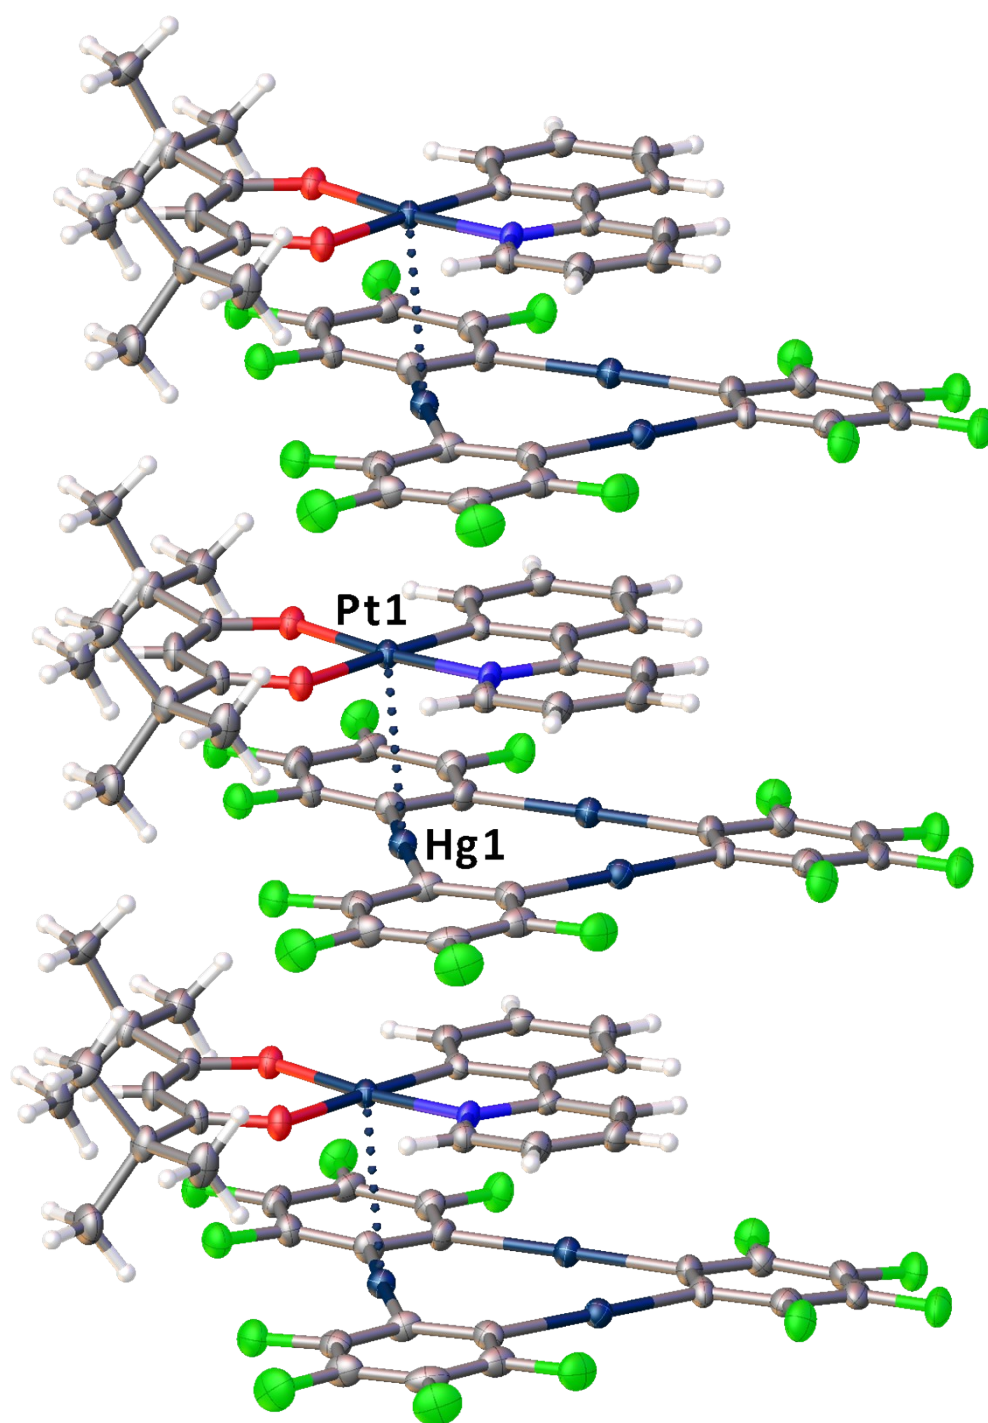

**Figure S7.** A fragment of crystal packing for  $3 \cdot \text{Hg}_3$  demonstrating heteropolar stacking between  $3$  and  $\text{Hg}_3$ . Short contacts  $\text{Hg} \cdots \text{Pt}$  are given by dotted lines.



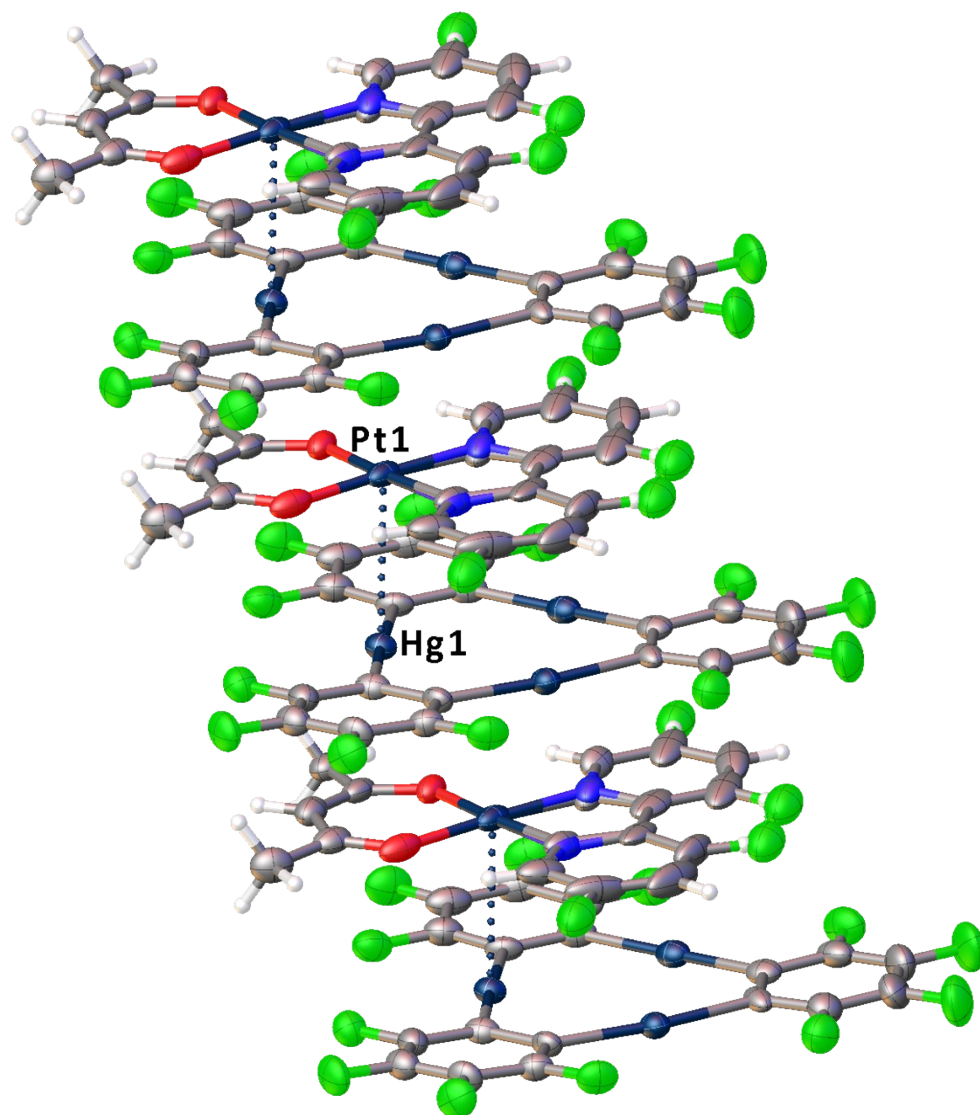

**Figure S8.** A fragment of crystal packing for  $4 \cdot \text{Hg}_3 \cdot \text{Me}_2\text{CO}$  demonstrating heteropolar stacking between **4** and **Hg<sub>3</sub>**. Short contacts  $\text{Hg} \cdots \text{Pt}$  are given by dotted lines. Molecules of  $\text{Me}_2\text{CO}$  were omitted for clarity.



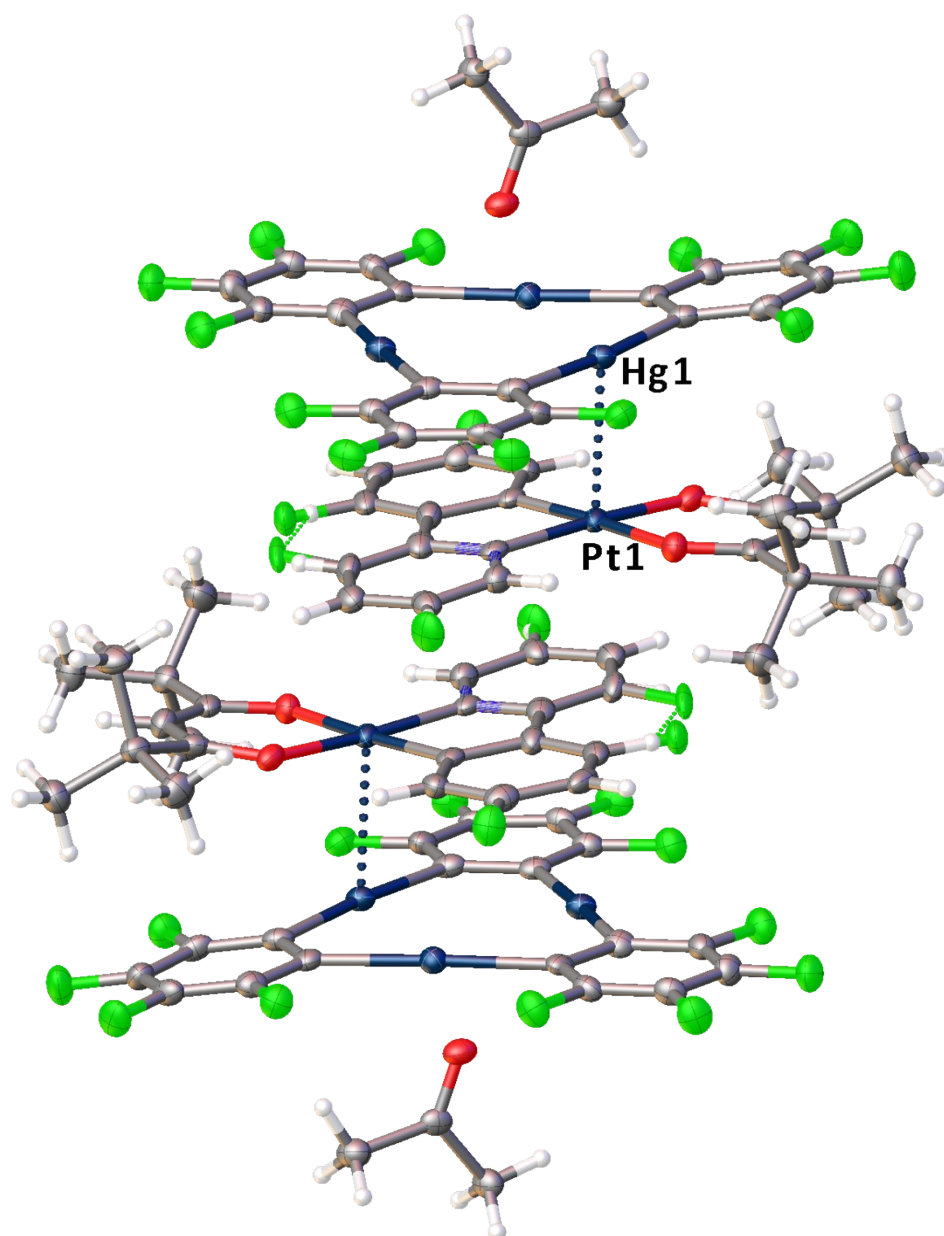

**Figure S9.** A fragment of crystal packing for  $5 \cdot \text{Hg}_3 \cdot \text{Me}_2\text{CO}$  demonstrating homoplanar stacking between two **5** and heteropolar stacking between **5** and **Hg<sub>3</sub>**. Short contacts  $\text{Hg} \cdots \text{Pt}$  are given by dotted lines.

**Table S1.** Crystal data and structure refinement for all compounds studied.

| Identification code                                                         | <b>1·Hg<sub>3</sub></b>                                                            | <b>2·Hg<sub>3</sub></b>                                                            | <b>3·Hg<sub>3</sub></b>                                                            | <b>4·Hg<sub>3</sub>·Me<sub>2</sub>CO</b>                                           | <b>5·Hg<sub>3</sub>·Me<sub>2</sub>CO</b>                                           |
|-----------------------------------------------------------------------------|------------------------------------------------------------------------------------|------------------------------------------------------------------------------------|------------------------------------------------------------------------------------|------------------------------------------------------------------------------------|------------------------------------------------------------------------------------|
| Empirical formula                                                           | C <sub>34</sub> H <sub>15</sub> F <sub>12</sub> Hg <sub>3</sub> NO <sub>2</sub> Pt | C <sub>36</sub> H <sub>19</sub> F <sub>12</sub> Hg <sub>3</sub> NO <sub>2</sub> Pt | C <sub>40</sub> H <sub>27</sub> F <sub>12</sub> Hg <sub>3</sub> NO <sub>2</sub> Pt | C <sub>37</sub> H <sub>19</sub> F <sub>14</sub> Hg <sub>3</sub> NO <sub>3</sub> Pt | C <sub>43</sub> H <sub>31</sub> F <sub>14</sub> Hg <sub>3</sub> NO <sub>3</sub> Pt |
| Formula weight                                                              | 1494.33                                                                            | 1522.38                                                                            | 1578.48                                                                            | 1588.38                                                                            | 1672.55                                                                            |
| Temperature, K                                                              | 100.0(2)                                                                           | 100.0(2)                                                                           | 100.0(2)                                                                           | 100.0(2)                                                                           | 100.0(2)                                                                           |
| Crystal size, mm                                                            | 0.01 × 0.01 × 0.11                                                                 | 0.01 × 0.02 × 0.12                                                                 | 0.01 × 0.02 × 0.21                                                                 | 0.01 × 0.03 × 0.20                                                                 | 0.05 × 0.05 × 0.07                                                                 |
| Wavelength, Å                                                               | 0.74500                                                                            | 0.74500                                                                            | 0.74500                                                                            | 0.74500                                                                            | 0.74500                                                                            |
| Crystal system                                                              | Triclinic                                                                          | Monoclinic                                                                         | Monoclinic                                                                         | Monoclinic                                                                         | Monoclinic                                                                         |
| Space group                                                                 | <i>P</i> -1                                                                        | <i>P</i> 2 <sub>1</sub> / <i>c</i>                                                 | <i>C</i> 2/ <i>c</i>                                                               | <i>P</i> 2 <sub>1</sub> / <i>c</i>                                                 | <i>P</i> 2 <sub>1</sub> / <i>c</i>                                                 |
| <i>a</i> , Å                                                                | 6.8150(6)                                                                          | 24.923(5)                                                                          | 46.347(3)                                                                          | 24.566(5)                                                                          | 10.8111(14)                                                                        |
| <i>b</i> , Å                                                                | 11.8179(12)                                                                        | 6.6890(13)                                                                         | 6.7991(4)                                                                          | 6.6889(13)                                                                         | 14.3859(18)                                                                        |
| <i>c</i> , Å                                                                | 23.580(2)                                                                          | 23.781(5)                                                                          | 25.3750(17)                                                                        | 22.906(4)                                                                          | 27.258(3)                                                                          |
| <i>α</i> , deg.                                                             | 78.260(10)                                                                         | 90                                                                                 | 90                                                                                 | 90                                                                                 | 90                                                                                 |
| <i>β</i> , deg.                                                             | 88.380(11)                                                                         | 106.25(3)                                                                          | 101.498(6)                                                                         | 104.207(11)                                                                        | 95.647(11)                                                                         |
| <i>γ</i> , deg.                                                             | 73.801(9)                                                                          | 90                                                                                 | 90                                                                                 | 90                                                                                 | 90                                                                                 |
| <i>V</i> , Å <sup>3</sup>                                                   | 1784.7(3)                                                                          | 3806.1(14)                                                                         | 7835.7(9)                                                                          | 3648.8(12)                                                                         | 4218.8(9)                                                                          |
| <i>Z</i>                                                                    | 2                                                                                  | 4                                                                                  | 8                                                                                  | 4                                                                                  | 4                                                                                  |
| Density (calc.), Mg/m <sup>3</sup>                                          | 2.781                                                                              | 2.657                                                                              | 2.676                                                                              | 2.891                                                                              | 2.633                                                                              |
| <i>μ</i> , mm <sup>-1</sup>                                                 | 18.959                                                                             | 17.783                                                                             | 17.239                                                                             | 18.522                                                                             | 16.067                                                                             |
| <i>F</i> (000)                                                              | 1336                                                                               | 2736                                                                               | 5728                                                                               | 2864                                                                               | 3056                                                                               |
| Theta range, deg.                                                           | 1.96 – 27.50                                                                       | 2.92 – 26.00                                                                       | 1.72 – 31.00                                                                       | 1.91 – 31.00                                                                       | 1.68 – 26.00                                                                       |
| Index ranges                                                                | -7 ≤ <i>h</i> ≤ 8,<br>-14 ≤ <i>k</i> ≤ 14,<br>-29 ≤ <i>l</i> ≤ 29                  | -29 ≤ <i>h</i> ≤ 29,<br>-7 ≤ <i>k</i> ≤ 7,<br>-27 ≤ <i>l</i> ≤ 27                  | -64 ≤ <i>h</i> ≤ 63,<br>-8 ≤ <i>k</i> ≤ 9,<br>-35 ≤ <i>l</i> ≤ 2335                | -33 ≤ <i>h</i> ≤ 33,<br>-9 ≤ <i>k</i> ≤ 9,<br>-31 ≤ <i>l</i> ≤ 30                  | -12 ≤ <i>h</i> ≤ 12,<br>-16 ≤ <i>k</i> ≤ 16,<br>-32 ≤ <i>l</i> ≤ 31                |
| Reflections collected                                                       | 20243                                                                              | 34034                                                                              | 40041                                                                              | 55580                                                                              | 40689                                                                              |
| Independent reflections, <i>R</i> <sub>int</sub>                            | 6769, 0.0525                                                                       | 6426, 0.0611                                                                       | 10454, 0.0307                                                                      | 10031, 0.0520                                                                      | 7143, 0.0233                                                                       |
| Reflections observed                                                        | 5721                                                                               | 5101                                                                               | 9356                                                                               | 9103                                                                               | 6647                                                                               |
| <i>R</i> <sub>1</sub> / <i>wR</i> <sub>2</sub> ( <i>I</i> > 2σ( <i>I</i> )) | 0.0662 / 0.1578                                                                    | 0.0332 / 0.0809                                                                    | 0.0300 / 0.0785                                                                    | 0.0529 / 0.1277                                                                    | 0.0291 / 0.0633                                                                    |
| <i>R</i> <sub>1</sub> / <i>wR</i> <sub>2</sub> (all data)                   | 0.0749 / 0.1628                                                                    | 0.0459 / 0.0869                                                                    | 0.0344 / 0.0806                                                                    | 0.0582 / 0.1308                                                                    | 0.0324 / 0.0648                                                                    |
| Goodness-of-fit on <i>F</i> <sup>2</sup>                                    | 1.052                                                                              | 1.027                                                                              | 1.083                                                                              | 1.090                                                                              | 1.122                                                                              |
| Extinction coefficient                                                      | 0.0021(2)                                                                          | 0.00026(4)                                                                         | 0.000337(12)                                                                       | 0.00192(9)                                                                         | 0.00077(3)                                                                         |
| <i>T</i> <sub>min</sub> / <i>T</i> <sub>max</sub>                           | 0.212 / 0.824                                                                      | 0.212 / 0.824                                                                      | 0.088 / 0.819                                                                      | 0.101 / 0.818                                                                      | 0.333 / 0.434                                                                      |
| Δρ <sub>max</sub> / Δρ <sub>min</sub> , e·Å <sup>-3</sup>                   | 3.861 / -3.762                                                                     | 2.603 / -1.288                                                                     | 1.638 / -1.950                                                                     | 2.916 / -3.160                                                                     | 2.500 / -1.829                                                                     |

### Powder XRD data for of (1–5)·Hg<sub>3</sub>

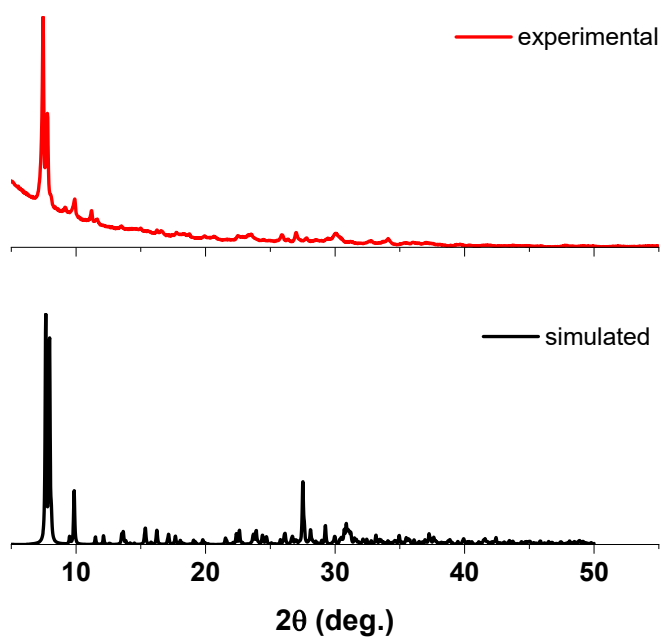

Figure S10. Powder XRD patterns of 1·Hg<sub>3</sub>.

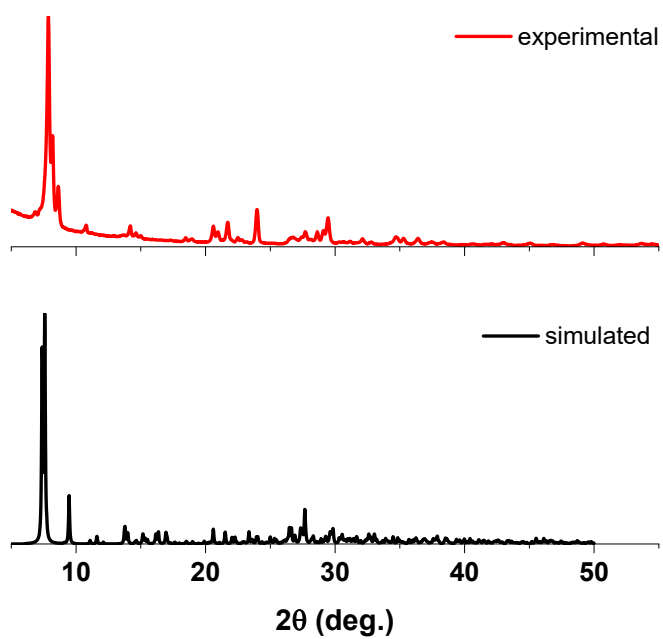

Figure S11. Powder XRD patterns of 2·Hg<sub>3</sub>.

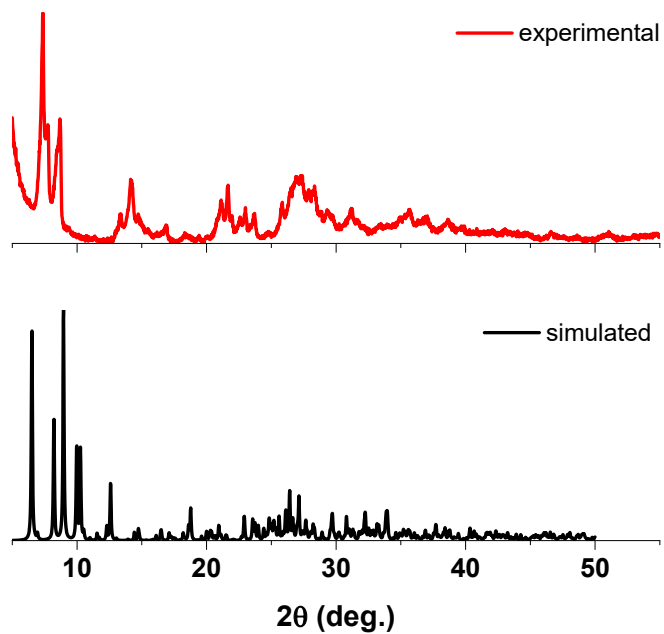

**Figure S12.** Powder XRD patterns of  $3 \cdot \text{Hg}_3$ .

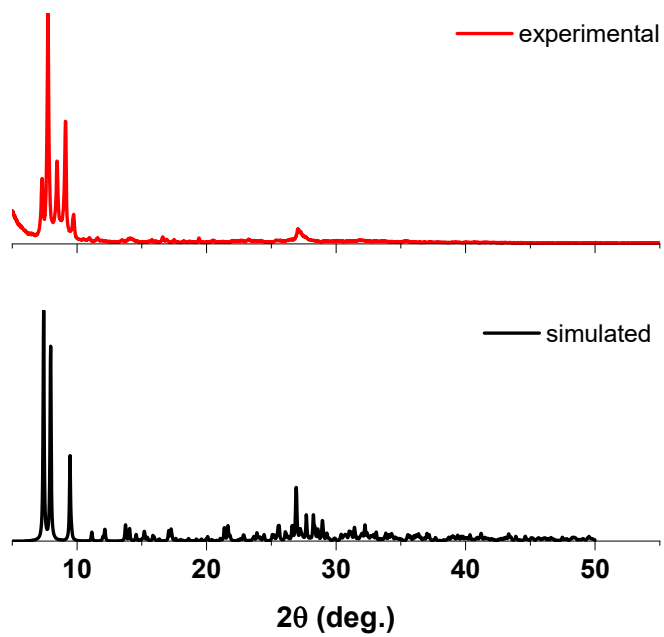

**Figure S13.** Powder XRD patterns of  $4 \cdot \text{Hg}_3$ .

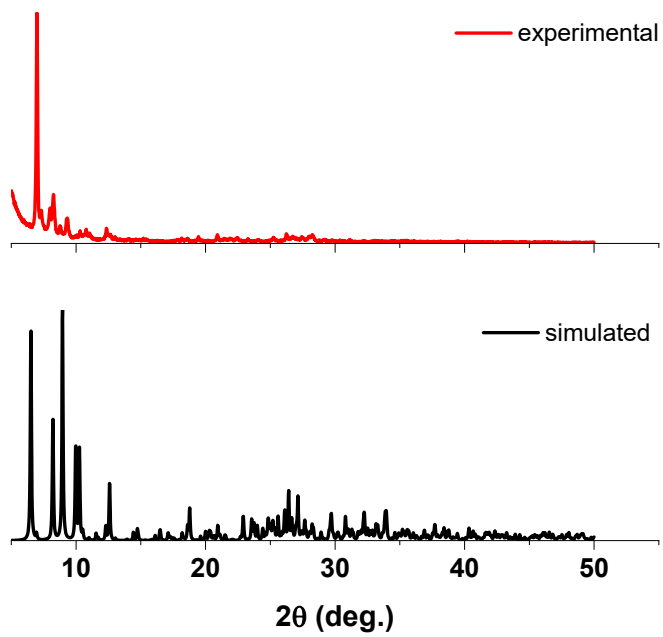

**Figure S14.** Powder XRD patterns of  $5 \cdot \text{Hg}_3$ .

## The Cambridge Structural Database (CSD) search for Short Hg $\cdots$ Pt contacts

The search was performed for intermolecular and intramolecular Hg $\cdots$ Pt contacts [3 or more separating bonds], mercury–platinum interatomic separation does not exceed  $\sum_{\text{vdw}} \text{Pt} + \text{Hg} + 0.5 \text{ \AA}$ , and the category of Hg–Pt bonds (any type). Due to the overlap of ranges of mercury–platinum distances for these two kinds of searches (2.77–3.46 and 2.51–3.16  $\text{\AA}$ , correspondingly), the results were combined and considered together in **Table S2**. Metal clusters and compounds with bi- or more-center contacts involving Hg and Pt atoms were not included in **Table S2** due to uncertainties in determining bond distances and angles.

**Table S2.** Covalent (or coordination) Hg–Pt bonds and noncovalent Hg $\cdots$ Pt contacts verified in the CSD search.

| Entry | CSD code and ref. ccdc No | Supported/not supported by bridging ligands | Hg $\cdots$ Pt distance, $\text{\AA}$ | angle X–Hg $\cdots$ Pt, $^\circ$ | Comments, contact/bond between                                                                           |
|-------|---------------------------|---------------------------------------------|---------------------------------------|----------------------------------|----------------------------------------------------------------------------------------------------------|
| 1     | ACHGPT10                  | supported                                   | 2.5126(9)                             | 172.456(2)                       | Linkage between {O <sub>2</sub> Hg <sup>II</sup> } and {N <sub>2</sub> C <sub>2</sub> Pt <sup>II</sup> } |
| 2     | COBTES                    | unsupported                                 | 2.6357(3)                             | 169.5762(14)                     | Linkage between {Hg} and two {P <sub>2</sub> CPt}                                                        |
| 3     | COJJAM                    | unsupported                                 | 2.6663(19)<br>2.629(2)                | 167.27(5)                        | Linkage between {Hg} and two {P <sub>2</sub> CPt}                                                        |
| 4     | DULPAB                    | unsupported                                 | 2.5717(16)                            | 171.92(5)                        | Linkage between {Hg} and two {P <sub>2</sub> CPt <sup>0</sup> }                                          |
| 5     | EBUHIT                    | unsupported                                 | 2.6093(4)<br>2.5914(4)                | 170.472(12)                      | Linkage between {Hg} and two {O <sub>3</sub> C <sub>2</sub> Pt}                                          |
| 6     | EBUHOZ                    | unsupported                                 | 2.5898(3)                             | 170.49(6)                        | Linkage between {Hg} and two {O <sub>3</sub> C <sub>2</sub> Pt <sup>II</sup> }                           |
| 7     | EBUHUF                    | unsupported                                 | 2.57587(19)                           | 170.25(6)                        | Linkage between {Hg} and two {P <sub>2</sub> CPt}                                                        |
| 8     | FEKYAW                    | supported                                   | 2.7909(5),<br>2.7950(5)               | 179.576(13)                      | Linkage between {PHg} and two                                                                            |

|    |        |                |                            |                         |                                                                                                                                                    |
|----|--------|----------------|----------------------------|-------------------------|----------------------------------------------------------------------------------------------------------------------------------------------------|
|    |        |                |                            |                         | {P <sub>3</sub> Pt}                                                                                                                                |
| 9  | FODFEK | unsupported    | 2.5199(6)                  | 175.01(12)              | Linkage between {ClHg} and {N <sub>2</sub> C <sub>2</sub> Pt}                                                                                      |
| 10 | FODFIO | supported      | 2.5093(7)                  | 176.3(3)                | Linkage between {O <sub>2</sub> Hg} and {N <sub>2</sub> C <sub>2</sub> OPt}                                                                        |
| 11 | GEHGSN | semi-supported | 2.6177(2)                  | 177.2956(4)             | Linkage between {GeHg} and {P <sub>2</sub> SnPt}                                                                                                   |
| 12 | HEZCAT | not applicable | 2.5710(7) and 2.9020(5)    | 177.46(13)              | Linkage between {O <sub>2</sub> Hg <sub>2</sub> } and {P <sub>4</sub> Pt <sub>2</sub> }, in heterometallic cluster Hg <sub>2</sub> Pt <sub>2</sub> |
| 13 | HEZVOA | semi-supported | 2.603(2)                   | 173.92(12)              | Linkage between {SiHg} and {P <sub>2</sub> HgPt}                                                                                                   |
| 14 | HUNZAT | unsupported    | 2.5357(10)                 | 174.85(9)               | Linkage between {ClHg <sup>I</sup> } and {N <sub>2</sub> C <sub>2</sub> ClPt <sup>III</sup> }                                                      |
| 15 | HUNZEX | unsupported    | 2.5439(11)                 | 171.94(3)               | Linkage between {BrHg <sup>I</sup> } and {N <sub>2</sub> C <sub>2</sub> BrPt <sup>III</sup> }                                                      |
| 16 | HUXDUB | unsupported    | 2.6710(7)<br>2.5902(7)     | 176.08(6)               | Linkage between {Si <sub>2</sub> Hg <sub>2</sub> } and {P <sub>2</sub> Si <sub>2</sub> Pt}                                                         |
| 17 | HUXFIR | unsupported    | 2.5965(2)                  | 175.71(3)               | Linkage between {SiHg <sup>I</sup> } and {PSiPt <sup>I</sup> }                                                                                     |
| 18 | KAXJEY | unsupported    | 2.530(3)                   | 175.6(7)                | Linkage between {CHg <sup>I</sup> } and {P <sub>3</sub> NPt <sup>0</sup> }                                                                         |
| 19 | KEYGUQ | unsupported    | 2.5567(9)                  | 174.3(2)                | Linkage between {OHg <sup>I</sup> } and {S <sub>2</sub> PCOPt <sup>III</sup> }                                                                     |
| 20 | LIFYEE | unsupported    | 2.575(2)                   | 164.66(15)              | Linkage between {FeHg} and {PC <sub>2</sub> Pt}                                                                                                    |
| 21 | MICCEG | supported      | 2.1585(12)*–<br>2.8339(14) | 93.6(2)                 | Linkage between {C <sub>2</sub> Hg <sup>II</sup> } and {P <sub>2</sub> Cl <sub>2</sub> Pt <sup>II</sup> }                                          |
| 22 | MICCOQ | supported      | 3.1335(6)                  | 157.46(6)               | Linkage between {PCClHg <sup>II</sup> } and {P <sub>2</sub> C <sub>2</sub> Pt <sup>II</sup> }                                                      |
| 23 | NEBZAV | unsupported    | 2.7676(14)                 | 113.80(7)–<br>109.45(5) | Linkage between {I <sub>3</sub> Hg <sup>II</sup> } and {PCS <sub>2</sub> Pt <sup>II</sup> }                                                        |
| 24 | NIDPUO | unsupported    | 2.603(8)                   | 177.8(8)                | Linkage between {SiHg <sup>I</sup> } and {P <sub>2</sub> SiPt <sup>I</sup> }                                                                       |



|    |          |             |                         |             |                                                                                                                   |
|----|----------|-------------|-------------------------|-------------|-------------------------------------------------------------------------------------------------------------------|
| 25 | OQANOL   | unsupported | 3.4604(5)               | 85.5(2)     | Linkage between {C <sub>2</sub> Hg <sup>II</sup> } and {C <sub>4</sub> Pt <sup>II</sup> } in coordination polymer |
| 26 | PEDJUF   | unsupported | 2.5250(2)               | 172.91(3)   | Linkage between {IHg <sup>I</sup> } and {P <sub>2</sub> IPt <sup>I</sup> }                                        |
| 27 | PEJYAE   | supported   | 2.7846(14)              | 81.9(5)     | Linkage between {N <sub>2</sub> Hg <sup>II</sup> } and {N <sub>4</sub> Pt <sup>II</sup> }                         |
| 28 | PEJYEI   | supported   | 2.8349(9)               | 137.87(6)   | between {Cl <sub>2</sub> N <sub>2</sub> Hg <sup>II</sup> } and {N <sub>4</sub> Pt <sup>II</sup> }                 |
| 29 | PEJYIM   | supported   | 2.7645(12)              | 82.7(3)     | Linkage between {Cl <sub>2</sub> N <sub>2</sub> Hg <sup>II</sup> } and {N <sub>4</sub> Pt <sup>II</sup> }         |
| 30 | PITFON10 | unsupported | 2.6153(9)               | 163.68(5)   | Linkage between {Hg} and two {P <sub>2</sub> CPt}                                                                 |
| 31 | PITFUT10 | unsupported | 2.644(2)                | 178.22(10)  | Linkage between {Hg} and two {P <sub>2</sub> CPt}                                                                 |
| 32 | PITGAA10 | unsupported | 2.6409(10)              | 167.25(5)   | Linkage between {Hg} and two {P <sub>2</sub> CPt}                                                                 |
| 33 | QIWDUY   | unsupported | 2.5108(6)               | 165.93(4)   | Linkage between {ClHg} and {N <sub>2</sub> C <sub>2</sub> ClPt}                                                   |
| 34 | QUCMAC   | unsupported | 2.5266(5)               | 173.51(3)   | Linkage between {BrHg} and {N <sub>2</sub> C <sub>2</sub> BrPt}                                                   |
| 35 | QUCMIK   | unsupported | 2.5128(4)               | 175.1(2)    | Linkage between {OHg} and {N <sub>2</sub> C <sub>2</sub> OPt}                                                     |
| 36 | QUCMOQ   | unsupported | 2.6283(3) and 2.5424(3) | 150.958(14) | Linkage between {Hg} and {N <sub>2</sub> C <sub>2</sub> Pt} and {N <sub>2</sub> C <sub>2</sub> OPt}               |
| 37 | RETJAB   | supported   | 2.7270(13)              | 141.7(5)    | Linkage between {N <sub>2</sub> OHg <sup>II</sup> } and {N <sub>4</sub> Pt <sup>II</sup> }                        |
| 38 | RUSBIQ   | unsupported | 2.584(3)                | 165.5(3)    | Linkage between {CHg <sup>I</sup> } and {P <sub>2</sub> (carboran)Pt <sup>I</sup> }                               |
| 39 | SESDUR   | unsupported | 2.560(3)                | 173.5(17)   | Linkage between {CHg <sup>I</sup> } and {P <sub>2</sub> ClPt <sup>I</sup> }                                       |
| 40 | SUTTEG   | supported   | 2.7955(14)              | 135.9(3)    | Linkage between {N <sub>2</sub> O <sub>2</sub> Hg <sup>II</sup> } and {N <sub>4</sub> Pt <sup>II</sup> } moieties |

|    |        |             |                            |                        |                                                                                                              |
|----|--------|-------------|----------------------------|------------------------|--------------------------------------------------------------------------------------------------------------|
| 41 | TEDHEP | unsupported | 2.5443(13)                 | 180                    | Linkage between {Hg} and two {N <sub>2</sub> C <sub>2</sub> OPt <sup>II</sup> }                              |
| 42 | TFMPHG | unsupported | 2.5688(4)                  | 174.6238(2)            | Linkage between {CHg <sup>I</sup> } and {P <sub>2</sub> CPT <sup>I</sup> }                                   |
| 43 | UMIVUH | supported   | 2.6130(6)                  | 166.4(3)               | Linkage between {O <sub>3</sub> Hg <sup>II</sup> } and {O <sub>2</sub> PCPt <sup>II</sup> }                  |
| 44 | VODMIK | unsupported | 2.6050(16)                 | 178.96(12)             | Linkage between {MnHg} and {P <sub>4</sub> Pt}                                                               |
| 45 | VODMOQ | unsupported | 2.5511(9)                  | 174.64(8)              | Linkage between {ClHg <sup>I</sup> } and {P <sub>4</sub> Pt <sup>I</sup> }                                   |
| 46 | WEDZEK | unsupported | 2.559(2)                   | 173.8(6)               | Linkage between {CHg} and {C <sub>2</sub> N <sub>2</sub> ClPt}                                               |
| 47 | XAKHIA | unsupported | 2.8078(11)                 | 99.53(6)–<br>111.86(6) | Linkage between {Br <sub>3</sub> Hg <sup>II</sup> } and {O <sub>2</sub> PCPt <sup>II</sup> }                 |
| 48 | XAKHOG | supported   | 2.6500(9)                  | 159.2(3)               | Linkage between {O <sub>2</sub> CHg <sup>II</sup> } and {O <sub>2</sub> PCPt <sup>II</sup> }                 |
| 49 | YIKXIZ | supported   | 3.154(2)<br>3.151(2)       | 91.0(3)<br>89.4(4)     | Linkage between {C <sub>2</sub> Hg <sup>II</sup> } and {S <sub>4</sub> Pt <sup>II</sup> } moieties           |
| 50 | YIKXOF | supported   | 3.021(3)                   | 89.6(3)<br>87.7(3)     | Linkage between {C <sub>2</sub> Hg <sup>II</sup> } and {S <sub>4</sub> Pt <sup>II</sup> } moieties,          |
| 51 | YOMVOO | unsupported | 2.5458(9) and<br>2.5483(8) | 172.15(2)              | Linkage between {Hg} and two {C <sub>2</sub> N <sub>2</sub> ClPt}                                            |
| 52 | YOMVUU | unsupported | 2.6635(7) and<br>2.5743(7) | 142.79(2)              | Linkage between {Hg} and {C <sub>2</sub> N <sub>2</sub> ClPt}; {PtHg} and {C <sub>2</sub> N <sub>2</sub> Pt} |
| 53 | UNUJIZ | unsupported | 2.5787(7) and<br>2.5840(6) | 174.166(17)            | Linkage between {Hg} and {O <sub>3</sub> NCPT} and {O <sub>2</sub> NCPT}                                     |
| 54 | UNUJOF | supported   | 2.6601(6) and<br>2.6940(6) | 155.63(2)              | Linkage between {O <sub>2</sub> Hg <sub>2</sub> <sup>I</sup> } and {O <sub>2</sub> NCPT <sup>II</sup> }      |

\*This distance was not included into analysis due to the structure two-fold disorder.

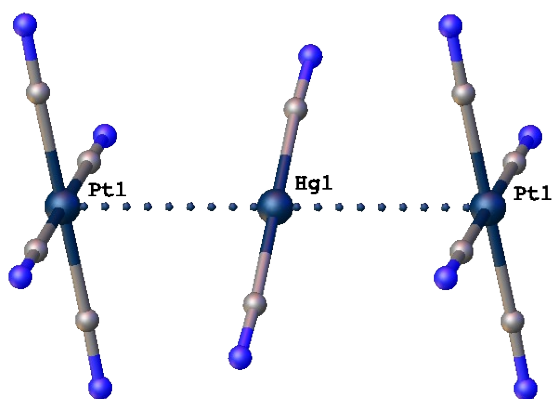

**Figure S15.** Fragment of Hg...Pt chain, linking the anionic  $[\text{Pt}(\text{CN})_4]^{2-}$  and neutral  $\text{Hg}(\text{CN})_2$  complexes, in the structure of the coordination polymer  $\text{K}_2\text{PtHg}(\text{CN})_6 \cdot 2\text{H}_2\text{O}$ .

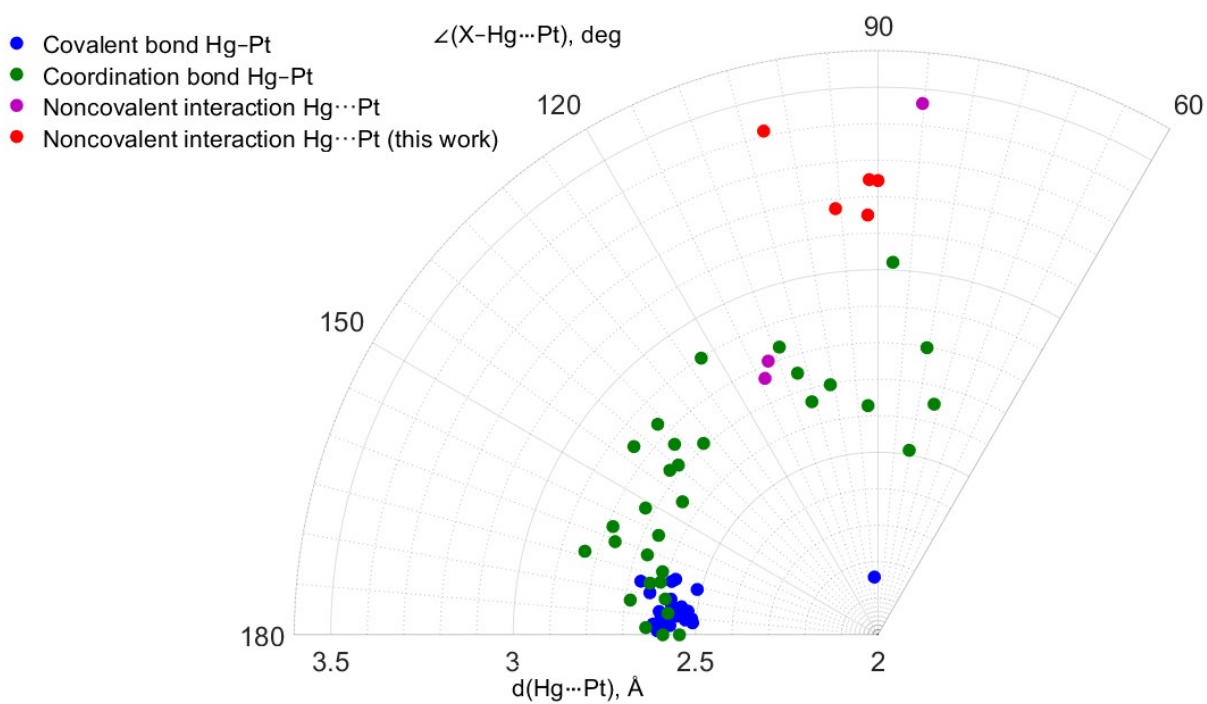

**Figure S16.** Angular distribution for intermolecular Hg...Pt contacts retrieved from the CCDC (Table S1).

## Theoretical considerations

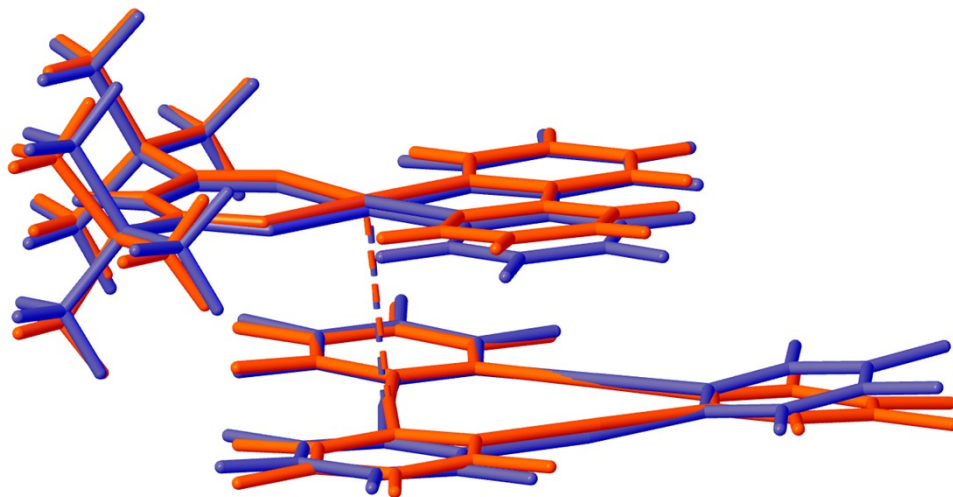

**Figure S17.** Overlaid images of optimized (blue) and X-Ray (b) geometries of [3·Hg<sub>3</sub>] (RMSD = 0.2808).

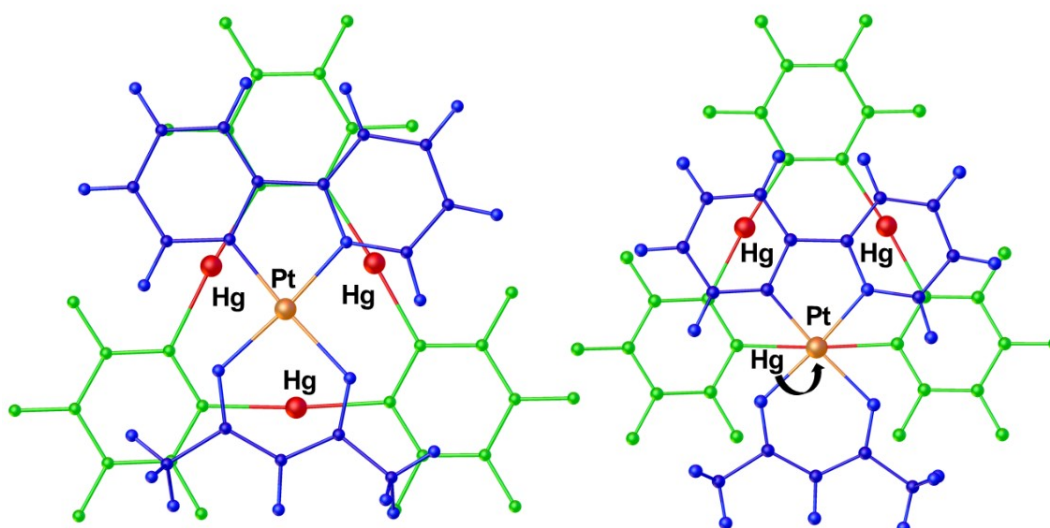

**Figure S18.** Two possible types of structures of [1·Hg<sub>3</sub>]<sup>a</sup> (left) and [1·Hg<sub>3</sub>]<sup>b</sup> (right).

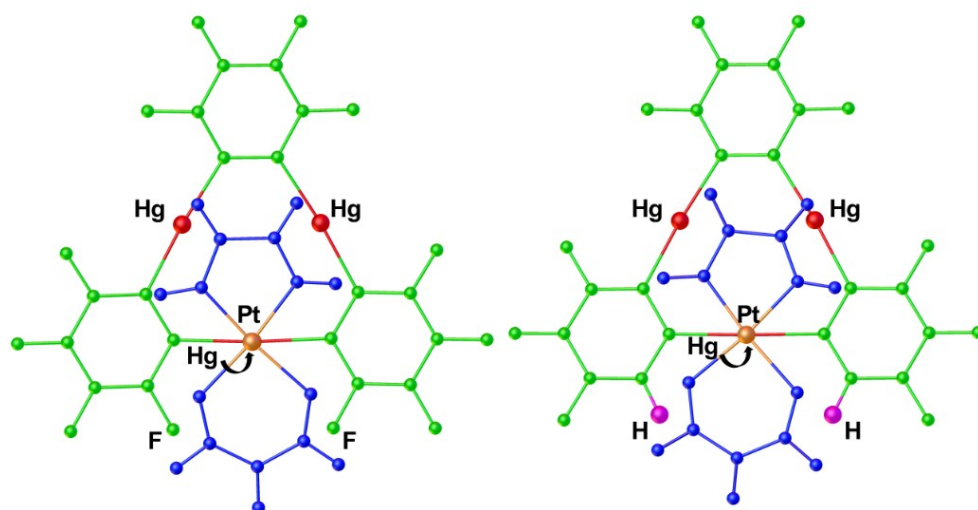

**Figure S19.** Equilibrium geometries of model complexes  $3M1 \cdot Hg_3$  (left) and  $3M2 \cdot Hg_3$  (right).

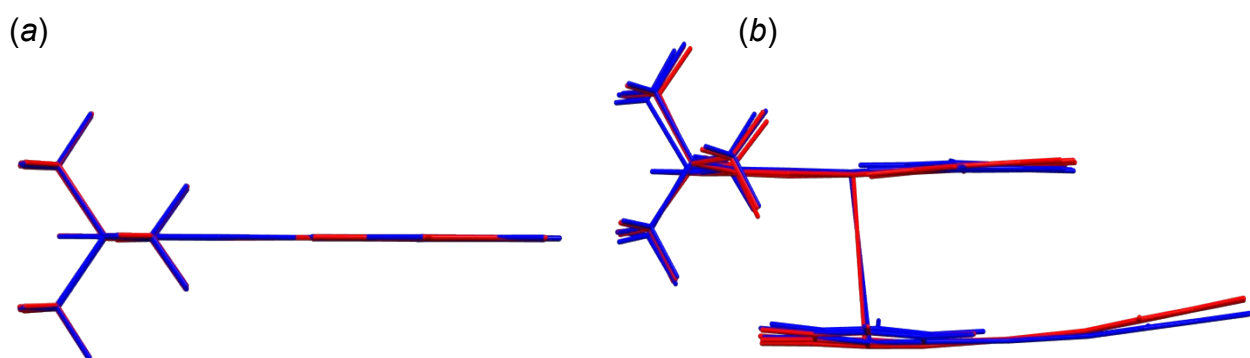

**Figure S20.** Overlaid images of optimized geometries of **3** (RMSD = 0.0255; *a*) and  $[3 \cdot Hg_3]$  (RMSD = 0.0828; *b*) in  $S_0$  (red) and  $T_1$  (blue) states.

**Table S3.** Calculated geometric parameters of **3** and  $[3 \cdot Hg_3]$  in ground and excited states.

| Entity                             | $d(Pt1 \cdots Hg1)$ ,<br>Å | $d(Pt1 - C40)$ , Å | $d(Pt1 - N1)$ , Å | $d(Pt1 - O1)$ , Å | $d(Pt1 - O2)$ , Å | $\alpha$ , ° <sup>[a]</sup> | $\beta$ , ° <sup>[b]</sup> |
|------------------------------------|----------------------------|--------------------|-------------------|-------------------|-------------------|-----------------------------|----------------------------|
| <b>3</b>                           |                            |                    |                   |                   |                   |                             |                            |
| <b>S0</b>                          | -                          | 1.960              | 1.988             | 1.999             | 2.090             | 0.13                        | -                          |
| <b><sup>3</sup>T1</b>              | -                          | 1.922              | 1.976             | 2.018             | 2.087             | 0.08                        | -                          |
| <b><sup>3</sup>MC</b>              | -                          | 1.995              | 2.179             | 2.145             | 2.109             | 50.84                       | -                          |
| <b>MECP</b>                        | -                          | 2.006              | 2.187             | 2.133             | 2.115             | 95.64                       | -                          |
| <b><math>[3 \cdot Hg_3]</math></b> |                            |                    |                   |                   |                   |                             |                            |
| <b>S0</b>                          | 3.111                      | 1.964              | 1.933             | 1.996             | 2.079             | 0.29                        | 2.97                       |
| <b><sup>3</sup>T1</b>              | 3.162                      | 1.923              | 1.982             | 2.012             | 2.073             | 1.31                        | 1.25                       |
| <b><sup>3</sup>MC</b>              | 3.021                      | 1.993              | 2.170             | 2.106             | 2.123             | 47.24                       | 4.34                       |
| <b>MECP</b>                        | 2.954                      | 2.004              | 2.156             | 2.100             | 2.092             | 92.00                       | 2.90                       |

<sup>[a]</sup>twist angle between the N1–Pt1–C40 and O1–Pt1–O2 planes (see **Figure S16**); <sup>[b]</sup>dihedral angle between the Hg1–Hg2–Hg3 and C1–C7–C13 planes.

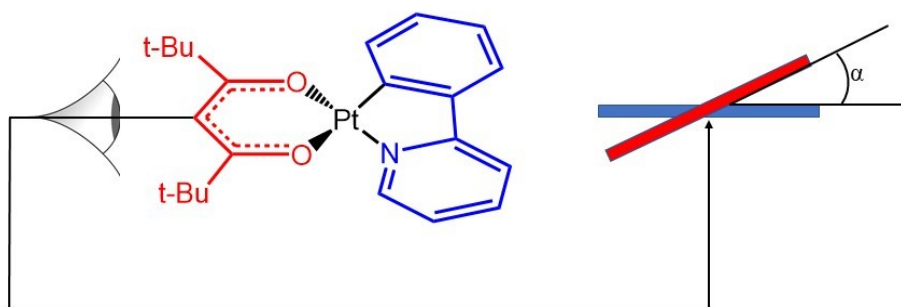

**Figure S21.** Schematic representation of twist angle.

**Table S4.** Calculated atomic Hirshfeld spin densities in  $T_1$  optimized structures (in e) of **3** and **[3·Hg<sub>3</sub>]**.

|                           | Pt, % | C <sup>N</sup> , % | O <sup>O</sup> , % | Hg <sub>3</sub> , % |
|---------------------------|-------|--------------------|--------------------|---------------------|
| <b>3</b>                  | 0.36  | 1.60               | 0.05               | -                   |
| <b>[3·Hg<sub>3</sub>]</b> | 0.27  | 1.61               | 0.04               | 0.08                |

**Table S5.** The relative energies of  $^3T_1$ ,  $^3MC$  states, and the energy barriers in nonradiative decay. The ground state of the open-ring form was treated as the zero point (in kcal/mol).

|              | <b>3</b> | <b>[3·Hg<sub>3</sub>]</b> |
|--------------|----------|---------------------------|
| $^3T_1$      | 59       | 59                        |
| $^3MC$       | 65       | 65                        |
| MECP         | 62       | 59                        |
| $\Delta E_2$ | 3        | 6                         |

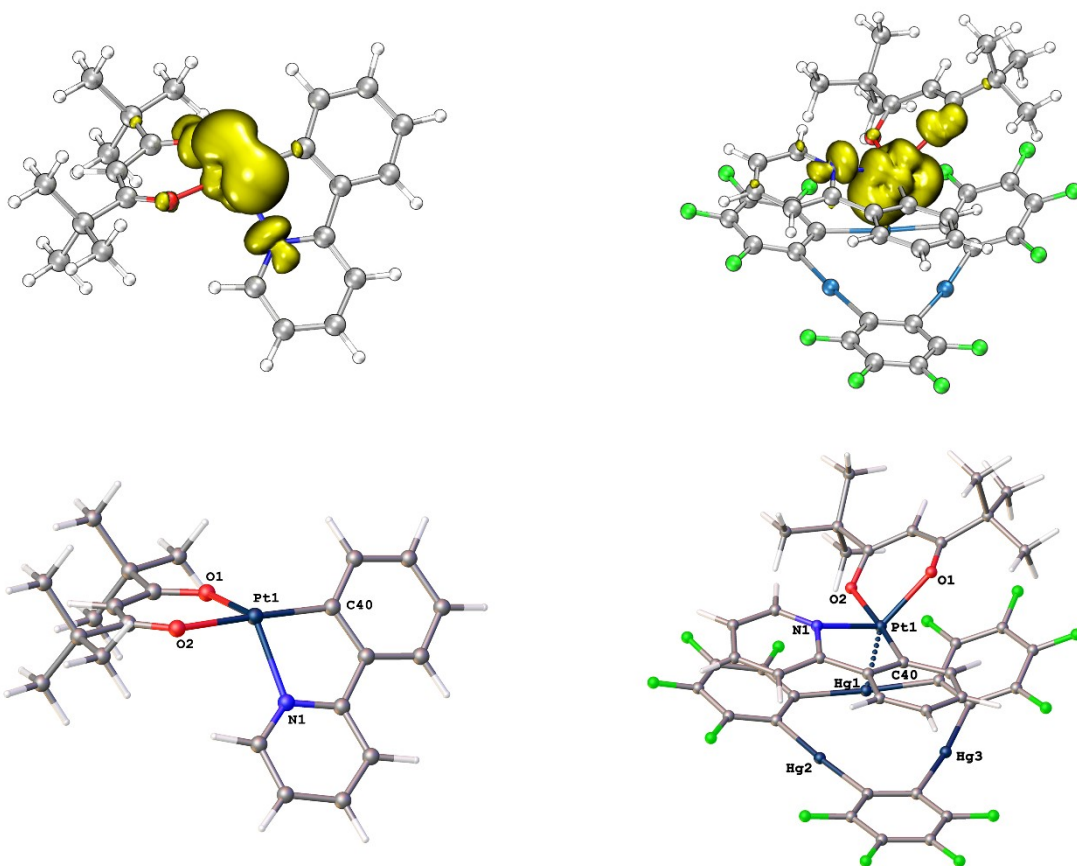

**Figure S22.** Spin densities computed on  $^3\text{MC}$  state for **3** and **[3·Hg<sub>3</sub>]** (isovalue = 0.005).

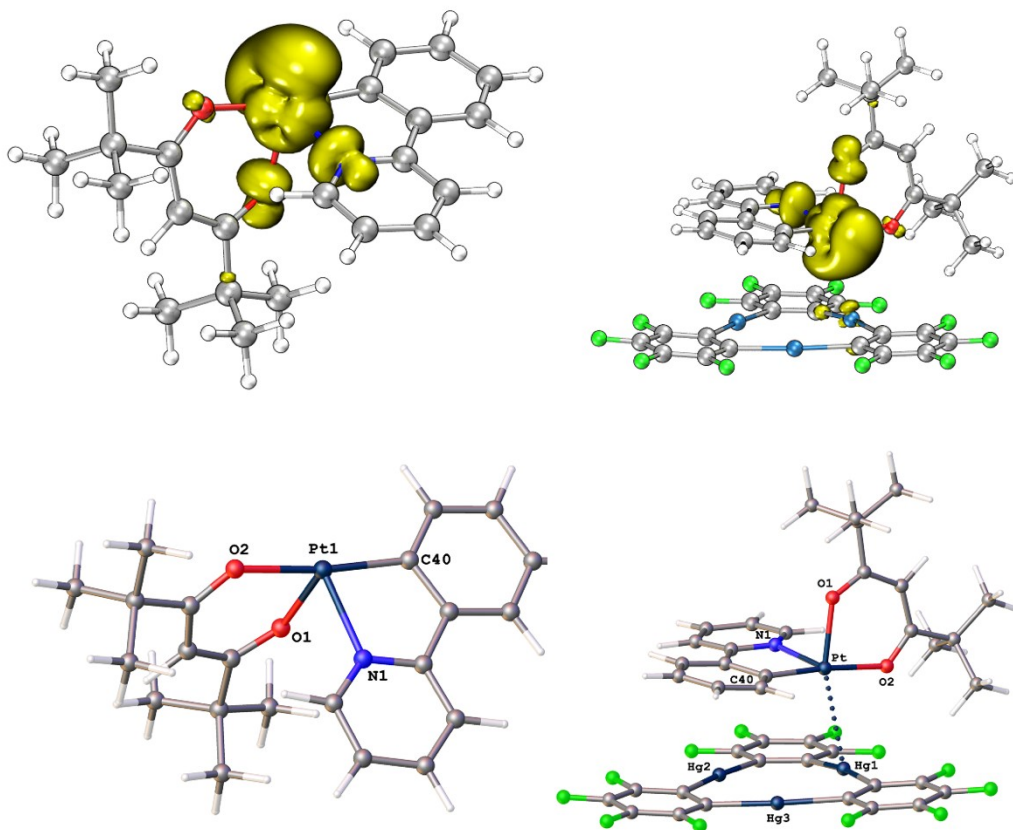

**Figure S23.** Spin densities computed on MECP ( $^3\text{MC}/\text{S}_0$ ) state for **3** and **[3·Hg<sub>3</sub>]** (isovalue = 0.005).



**Table S6.** Percentage MO contributions of atoms and ligands to FMOs in **3**.

| Pt     | Pt, % | C^N, % | O^O, % |
|--------|-------|--------|--------|
| HOMO-3 | 5     | 88     | 7      |
| HOMO-2 | 87    | 8      | 5      |
| HOMO-1 | 33    | 29     | 38     |
| HOMO   | 31    | 47     | 21     |
| LUMO   | 7     | 91     | 2      |
| LUMO+1 | 1     | 88     | 10     |
| LUMO+2 | 4     | 12     | 84     |
| LUMO+3 | 10    | 86     | 4      |
| LUMO+4 | 21    | 20     | 59     |
| LUMO+5 | 28    | 22     | 49     |

**Table S7.** Percentage MO contributions of atoms and ligands to FMOs in [**3**·**Hg<sub>3</sub>**].

| Pt-Hg   | Pt, % | C^N, % | O^O, % | Hg <sub>3</sub> , % |
|---------|-------|--------|--------|---------------------|
| HOMO-3  | 7     | 18     | 4      | 71                  |
| HOMO-2  | 47    | 21     | 6      | 26                  |
| HOMO-1  | 29    | 36     | 25     | 12                  |
| HOMO    | 23    | 28     | 46     | 3                   |
| LUMO    | 7     | 78     | 2      | 13                  |
| LUMO+1  | 2     | 30     | 1      | 67                  |
| LUMO+2  | 1     | 63     | 2      | 34                  |
| LUMO+3  | 1     | 9      | 7      | 83                  |
| LUMO+4  | 4     | 11     | 8      | 77                  |
| LUMO+5  | 3     | 7      | 67     | 23                  |
| LUMO+6  | 4     | 13     | 10     | 73                  |
| LUMO+7  | 4     | 46     | 3      | 47                  |
| LUMO+8  | 0     | 4      | 1      | 95                  |
| LUMO+9  | 0     | 4      | 1      | 95                  |
| LUMO+10 | 1     | 8      | 1      | 90                  |
| LUMO+11 | 2     | 25     | 1      | 72                  |
| LUMO+12 | 31    | 38     | 13     | 18                  |
| LUMO+13 | 7     | 65     | 3      | 25                  |
| LUMO+14 | 1     | 13     | 14     | 72                  |
| LUMO+15 | 8     | 14     | 8      | 70                  |

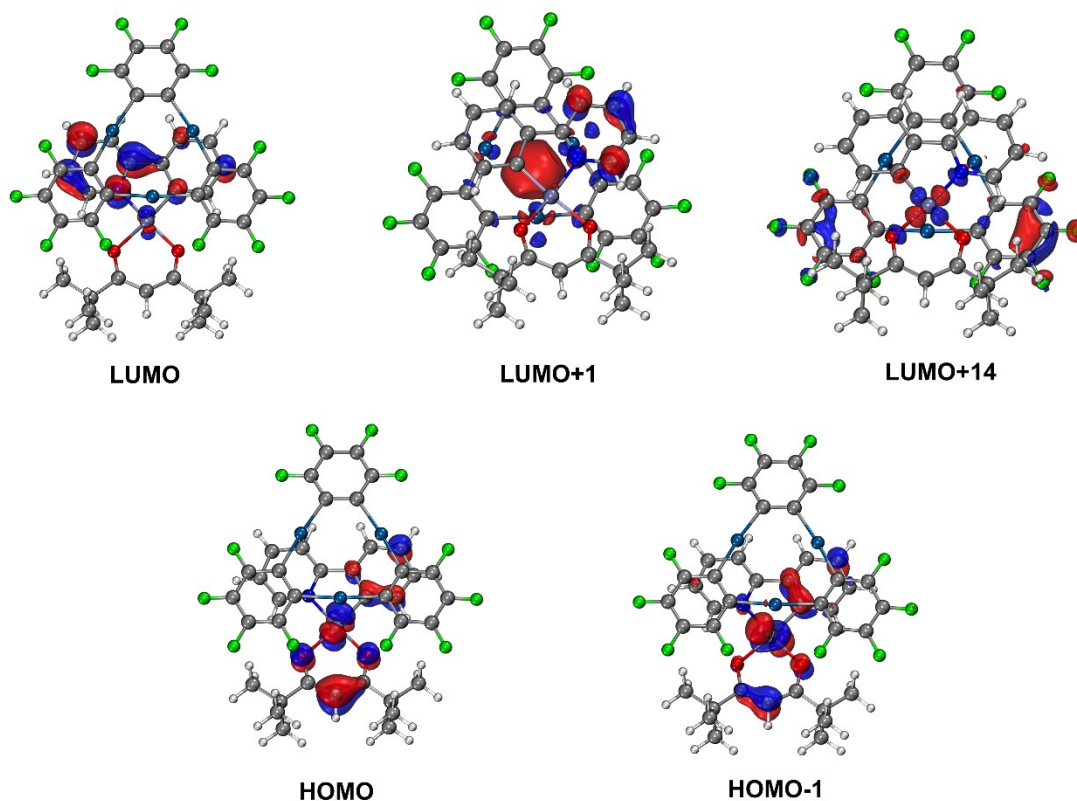

**Figure S24.** Molecular orbitals for  $[3 \cdot \text{Hg}_3]$ , calculated at the PBE0-D3BJ/ZORA-def2-TZVP level of theory.

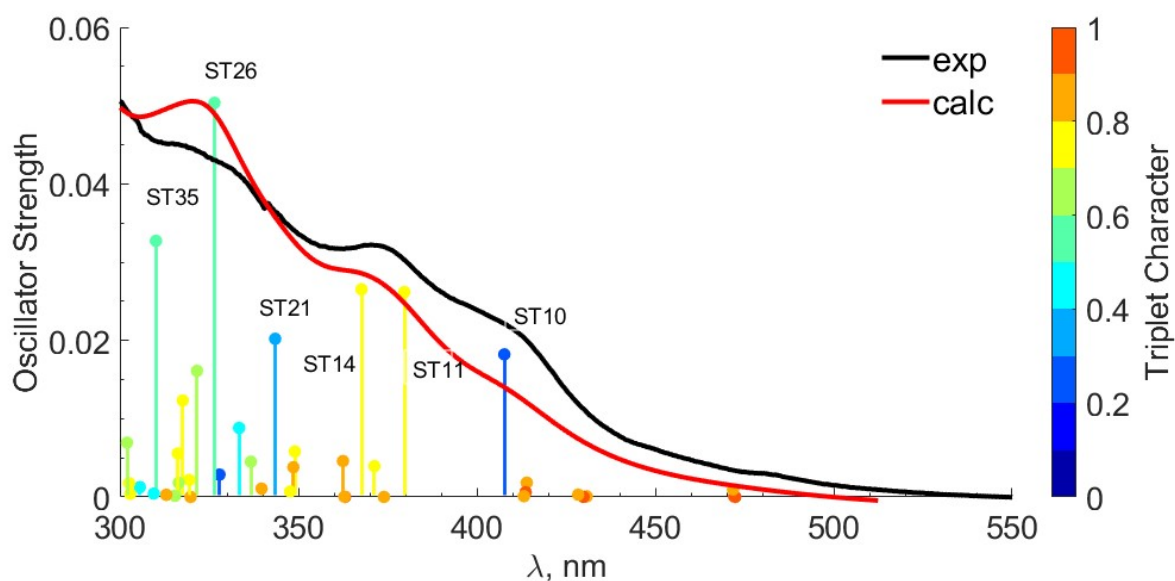

**Figure S25.** Experimental (black line) and the SOC-TDDFT calculated absorption (red line) spectra for **3**: excitation energies and oscillator strengths are shown by the vertical lines; the spectrum is convoluted with a Lorentzian function having a full width at half-maximum of  $0.35 \text{ cm}^{-1}$ .

**Table S8.** Excitation wavelengths (nm), oscillator strengths ( $f$ ) and contributions of scalar relativistic (SR) states for **3** calculated with SR-TDDFT and SOC-TDDFT.

| SR States (TDDFT Singlet-Singlet Excitations) |            |                |     |             |
|-----------------------------------------------|------------|----------------|-----|-------------|
| State                                         | Energy(eV) | $\lambda$ (nm) | $f$ | Transitions |
|                                               |            |                |     |             |

|                                                      |      |     |       |                                                                                                                                                            |
|------------------------------------------------------|------|-----|-------|------------------------------------------------------------------------------------------------------------------------------------------------------------|
| S1                                                   | 2.98 | 403 | 0.029 | H-1 → L (6%); H → L (90%);                                                                                                                                 |
| S2                                                   | 3.37 | 357 | 0.019 | H-2 → L (38%); H-1 → L (53%); H → L (2%); H → L+1 (5%);                                                                                                    |
| S3                                                   | 3.49 | 344 | 0.008 | H-2 → L (39%); H-1 → L (7%); H → L (3%); H → L+1 (46%);                                                                                                    |
| S4                                                   | 3.58 | 335 | 0.151 | H-2 → L (20%); H-1 → L (29%); H → L (3%); H → L+1 (42%); H → L+2 (2%);                                                                                     |
| S5                                                   | 3.67 | 327 | 0.001 | H-3 → L (2%); H-1 → L+1 (3%); H → L+1 (4%); H → L+2 (88%); H → L+2 (2%);                                                                                   |
| S6                                                   | 3.88 | 309 | 0.021 | H-3 → L (3%); H-2 → L+1 (36%); H-2 → L+2 (14%); H-1 → L+1 (39%); H → L+2 (3%);                                                                             |
| S7                                                   | 3.92 | 306 | 0.031 | H-3 → L (18%); H-2 → L+1 (29%); H-2 → L+2 (9%); H-1 → L+1 (31%); H-1 → L+2 (7%);                                                                           |
| S8                                                   | 3.97 | 302 | 0.006 | H-5 → L (11%); H-4 → L (82%); H-2 → L+2 (9%); H-1 → L+1 (31%); H-1 → L+2 (7%);                                                                             |
| S9                                                   | 4.05 | 297 | 0.035 | H-3 → L (28%); H-2 → L+1 (6%); H-2 → L+2 (2%); H-1 → L+1 (16%); H-1 → L+2 (38%);                                                                           |
| S10                                                  | 4.17 | 288 | 0.022 | H-3 → L (6%); H-2 → L+1 (24%); H-2 → L+2 (58%); H-1 → L+2 (8%); H-1 → L+2 (38%);                                                                           |
| S11                                                  | 4.30 | 279 | 0.156 | H-5 → L (11%); H-3 → L (33%); H-2 → L+1 (3%); H-2 → L+2 (11%); H-1 → L+1 (4%); H-1 → L+2 (30%);                                                            |
| S12                                                  | 4.36 | 275 | 0.009 | H-5 → L+1 (10%); H-5 → L+2 (5%); H-4 → L+1 (53%); H-4 → L+2 (25%); H-1 → L+1 (4%); H-1 → L+2 (30%);                                                        |
| S13                                                  | 4.47 | 268 | 0.053 | H-6 → L (13%); H-6 → L+1 (4%); H-6 → L+2 (3%); H-5 → L (48%); H-4 → L (6%); H-3 → L+1 (7%); H-2 → L+2 (2%); H-1 → L+2 (5%);                                |
| S14                                                  | 4.57 | 262 | 0.018 | H-6 → L (35%); H-6 → L+1 (15%); H-6 → L+2 (10%); H-5 → L (7%); H-5 → L+2 (3%); H-4 → L (3%); H-4 → L+1 (2%); H-3 → L+1 (4%); H-3 → L+2 (3%); H → L+4 (2%); |
| S15                                                  | 4.60 | 261 | 0.032 | H-6 → L (14%); H-6 → L+1 (13%); H-6 → L+2 (9%); H-5 → L (6%); H-5 → L+1 (4%); H-3 → L+1 (36%); H → L+4 (3%); H-3 → L+1 (4%); H-3 → L+2 (3%); H → L+4 (2%); |
| <b>SR States (TDDFT Singlet-Triplet Excitations)</b> |      |     |       |                                                                                                                                                            |
| T1                                                   | 2.46 | 488 | 0.000 | H-3 → L (5%); H-3 → L+1 (2%); H-1 → L (24%); H → L (54%); H → L+1 (3%); H → L+3 (2%);                                                                      |
| T2                                                   | 2.75 | 436 | 0.000 | H-5 → L+2 (3%); H-4 → L+2 (2%); H-3 → L+1 (5%); H-1 → L (19%); H-1 → L+1 (9%); H-1 → L+2 (8%); H → L (21%); H → L+1 (17%); H → L+2 (7%);                   |
| T3                                                   | 2.83 | 424 | 0.001 | H-5 → L+1 (2%); H-4 → L (2%); H-3 → L+2 (4%); H-1 → L (17%); H-1 → L+1 (12%); H-1 → L+2 (10%); H → L (17%); H → L+1 (8%); H → L+2 (12%);                   |
| T4                                                   | 3.20 | 375 | 0.000 | H-3 → L (39%); H-3 → L+3 (3%); H-3 → L+5 (2%); H → L+1 (13%); H → L+2 (17%); H → L+3 (6%); H → L (17%); H → L+1 (8%); H → L+2 (12%);                       |
| T5                                                   | 3.25 | 370 | 0.000 | H-3 → L (6%); H-3 → L+1 (5%); H-3 → L+2 (6%); H-2 → L (16%); H-1 → L (22%); H-1 → L+1 (9%); H-1 → L+2 (2%); H → L+1 (19%); H → L+2 (6%);                   |
| T6                                                   | 3.25 | 369 | 0.000 | H-2 → L (74%); H-1 → L+1 (3%); H → L+1 (9%); H → L+2 (6%); H-1 → L (22%); H-1 → L+1 (9%); H-1 → L+2 (2%); H → L+1 (19%); H → L+2 (6%);                     |
| T7                                                   | 3.47 | 346 | 0.002 | H-3 → L (2%); H-3 → L+1 (7%); H-1 → L+1 (17%); H-1 → L+2 (21%); H → L+1 (13%); H → L+2 (30%); H-1 → L+2 (2%); H → L+1 (19%); H → L+2 (6%);                 |
| T8                                                   | 3.65 | 329 | 0.001 | H-8 → L (3%); H-3 → L (28%); H-3 → L+1 (7%); H-3 → L+2 (7%); H-3 → L+3 (3%); H → L+1 (3%); H → L+3 (32%); H → L+1 (19%); H → L+2 (6%);                     |
| T9                                                   | 3.81 | 315 | 0.000 | H-4 → L (23%); H-4 → L+1 (3%); H-3 → L (7%); H-3 → L+1 (3%); H-3 → L+2 (3%); H-1 → L (8%); H-1 → L+1 (20%); H-1 → L+2 (18%); H → L+2 (6%);                 |

| T10                                   | 3.83        | 314    | 0.018 | H-2 → L+1 (59%); H-2 → L+2 (30%); H-3 → L (7%); H-3 → L+1 (3%); H-3 → L+2 (3%); H-1 → L (8%); H-1 → L+1 (20%); H-1 → L+2 (18%); H → L+2 (6%); |
|---------------------------------------|-------------|--------|-------|-----------------------------------------------------------------------------------------------------------------------------------------------|
| T11                                   | 3.88        | 309    | 0.026 | H-5 → L (3%); H-4 → L (40%); H-1 → L+1 (17%); H-1 → L+2 (19%); H → L+1 (3%); H → L+2 (3%); H → L+3 (6%); H-1 → L+2 (18%); H → L+2 (6%);       |
| T12                                   | 3.95        | 304    | 0.000 | H-8 → L+1 (4%); H-8 → L+2 (2%); H-5 → L (10%); H-4 → L (19%); H-3 → L+1 (12%); H-3 → L+2 (7%); H → L+1 (4%); H → L+2 (6%); H → L+3 (15%);     |
| T13                                   | 4.09        | 294    | 0.004 | H-6 → L+1 (4%); H-6 → L+2 (3%); H-5 → L (3%); H-4 → L+1 (33%); H-4 → L+2 (27%); H-1 → L+2 (7%); H → L+2 (3%); H → L+4 (2%); H → L+3 (15%);    |
| T14                                   | 4.13        | 290    | 0.027 | H-6 → L (4%); H-5 → L (5%); H-2 → L+1 (22%); H-2 → L+2 (51%); H → L+4 (4%); H-1 → L+2 (7%); H → L+2 (3%); H → L+4 (2%); H → L+3 (15%);        |
| T15                                   | 4.16        | 288    | 0.000 | H-7 → L+4 (3%); H-2 → L+1 (7%); H-2 → L+2 (4%); H-2 → L+4 (4%); H-2 → L+6 (2%); H → L+4 (32%); H → L+6 (21%); H → L+7 (4%); H → L+3 (15%);    |
| <b>States calculated by SOC-TDDFT</b> |             |        |       |                                                                                                                                               |
| State                                 | Energy (eV) | λ (nm) | f     | Component Scalar Transitions                                                                                                                  |
| ST1                                   | 2.54        | 472    | 0.000 | T1(95%); T6(1%);                                                                                                                              |
| ST2                                   | 2.54        | 472    | 0.000 | T1(95%);                                                                                                                                      |
| ST3                                   | 2.54        | 472    | 0.001 | T1(94%);                                                                                                                                      |
| ST4                                   | 2.79        | 431    | 0.000 | S1(3%); T2(64%); T3(19%); T5(2%); T6(7%);                                                                                                     |
| ST5                                   | 2.79        | 430    | 0.000 | T2(65%); T3(17%); T5(3%); T6(10%);                                                                                                            |
| ST6                                   | 2.80        | 428    | 0.000 | S2(7%); S3(2%); T2(71%); T3(15%);                                                                                                             |
| ST7                                   | 2.90        | 414    | 0.002 | S1(4%); T2(26%); T3(66%); T6(1%);                                                                                                             |
| ST8                                   | 2.90        | 414    | 0.001 | T2(27%); T3(68%);                                                                                                                             |
| ST9                                   | 2.90        | 413    | 0.000 | S2(1%); T2(21%); T3(73%);                                                                                                                     |
| ST10                                  | 2.94        | 408    | 0.018 | S1(68%); T3(4%); T5(6%); T6(16%);                                                                                                             |
| ST11                                  | 3.16        | 380    | 0.026 | S2(13%); S3(3%); S4(4%); T1(1%); T4(7%); T5(18%); T6(48%);                                                                                    |
| ST12                                  | 3.21        | 374    | 0.000 | T3(4%); T4(24%); T5(38%); T6(26%);                                                                                                            |
| ST13                                  | 3.23        | 371    | 0.004 | S1(1%); S2(13%); S8(2%); T3(2%); T4(33%); T5(28%); T6(14%);                                                                                   |
| ST14                                  | 3.26        | 368    | 0.027 | S1(1%); S3(10%); S4(4%); T3(2%); T4(37%); T5(37%); T6(1%);                                                                                    |
| ST15                                  | 3.31        | 363    | 0.000 | T4(66%); T5(18%); T6(12%);                                                                                                                    |
| ST16                                  | 3.31        | 363    | 0.000 | T4(57%); T5(23%); T6(15%);                                                                                                                    |
| ST17                                  | 3.31        | 363    | 0.005 | S3(1%); T4(46%); T5(31%); T6(16%);                                                                                                            |
| ST18                                  | 3.44        | 349    | 0.006 | S3(3%); S4(3%); T10(3%); T13(2%); T6(4%); T7(71%);                                                                                            |
| ST19                                  | 3.44        | 349    | 0.004 | S3(1%); S4(2%); T10(5%); T13(2%); T19(2%); T5(2%); T6(3%); T7(72%);                                                                           |
| ST20                                  | 3.45        | 348    | 0.001 | S12(4%); S3(1%); S6(6%); S7(2%); T7(80%);                                                                                                     |
| ST21                                  | 3.49        | 344    | 0.020 | S2(7%); S3(28%); S4(22%); S5(2%); T10(25%); T5(1%); T6(3%); T7(4%);                                                                           |
| ST22                                  | 3.53        | 340    | 0.001 | S3(1%); S8(1%); T10(1%); T2(3%); T3(5%); T4(5%); T5(28%); T6(30%); T7(11%); T8(4%);                                                           |
| ST23                                  | 3.56        | 337    | 0.005 | S1(12%); S5(5%); T11(1%); T12(2%); T2(3%); T3(4%); T4(4%); T5(25%); T6(30%); T7(3%);                                                          |
| ST24                                  | 3.60        | 333    | 0.009 | S2(37%); S3(8%); S4(1%); T12(3%); T2(2%); T3(3%); T4(3%); T6(16%); T8(9%); T9(3%);                                                            |
| ST25                                  | 3.66        | 328    | 0.003 | S3(5%); S5(64%); T10(5%); T14(5%); T5(2%); T6(2%); T8(3%); T9(2%);                                                                            |
| ST26                                  | 3.67        | 327    | 0.050 | S3(9%); S4(22%); S5(3%); T11(4%); T5(9%); T6(3%); T8(32%); T9(4%);                                                                            |
| ST27                                  | 3.73        | 322    | 0.016 | S6(9%); S7(7%); S9(7%); T10(47%); T13(6%); T8(6%); T9(6%);                                                                                    |
| ST28                                  | 3.75        | 320    | 0.000 | S6(1%); T10(2%); T14(2%); T15(1%); T6(2%); T8(73%); T9(8%);                                                                                   |

|      |      |     |       |                                                                                                                             |
|------|------|-----|-------|-----------------------------------------------------------------------------------------------------------------------------|
| ST29 | 3.76 | 319 | 0.002 | S10(4%); S2(3%); S5(1%); S7(1%); S8(1%); S9(2%); T10(7%); T11(2%); T8(59%); T9(10%);                                        |
| ST30 | 3.78 | 318 | 0.012 | S2(1%); S3(1%); S4(4%); T10(9%); T11(14%); T14(5%); T6(2%); T8(28%); T9(20%);                                               |
| ST31 | 3.79 | 317 | 0.002 | S10(4%); S3(1%); S6(12%); T11(16%); T13(2%); T14(4%); T8(12%); T9(37%);                                                     |
| ST32 | 3.79 | 316 | 0.006 | S3(4%); S4(3%); S6(1%); S8(1%); T10(9%); T11(3%); T13(5%); T8(30%); T9(25%);                                                |
| ST33 | 3.81 | 315 | 0.000 | S10(3%); S2(1%); S3(2%); S4(2%); S7(7%); S9(1%); T10(2%); T11(19%); T14(7%); T8(15%); T9(27%);                              |
| ST34 | 3.83 | 313 | 0.000 | S8(2%); T10(31%); T11(7%); T13(22%); T14(5%); T15(2%); T7(3%); T8(1%); T9(13%);                                             |
| ST35 | 3.87 | 310 | 0.033 | S4(4%); S5(1%); S6(4%); S7(11%); S9(3%); T10(21%); T11(2%); T12(4%); T13(23%); T14(5%); T15(2%); T7(2%); T9(2%);            |
| ST36 | 3.88 | 310 | 0.000 | S10(5%); S6(21%); S7(16%); T11(6%); T12(2%); T13(24%); T7(3%); T9(6%);                                                      |
| ST37 | 3.93 | 306 | 0.001 | S11(4%); S3(2%); S5(2%); S6(3%); S7(7%); S8(2%); S9(18%); T10(5%); T11(11%); T12(8%); T13(2%); T14(17%); T16(4%);           |
| ST38 | 3.96 | 303 | 0.000 | S10(2%); S9(1%); T11(37%); T12(15%); T15(3%); T17(3%); T9(21%);                                                             |
| ST39 | 3.96 | 303 | 0.002 | S10(3%); S6(2%); S7(2%); S9(2%); T11(39%); T12(8%); T14(4%); T16(1%); T17(2%); T9(21%);                                     |
| ST40 | 3.97 | 302 | 0.007 | S10(2%); S11(3%); S6(1%); S7(4%); S9(3%); T11(23%); T12(18%); T14(17%); T15(1%); T21(1%); T9(13%);                          |
| ST41 | 4.02 | 299 | 0.004 | S2(3%); S7(3%); S8(1%); S9(1%); T11(12%); T12(32%); T14(5%); T15(9%); T18(2%); T19(2%); T25(2%); T9(7%);                    |
| ST42 | 4.02 | 298 | 0.000 | S10(1%); T11(9%); T12(37%); T13(2%); T14(5%); T15(7%); T16(3%); T17(1%); T18(1%); T19(2%); T25(3%); T8(1%); T9(7%);         |
| ST43 | 4.04 | 297 | 0.012 | S10(2%); S3(1%); S4(4%); S8(5%); T11(14%); T12(30%); T13(1%); T14(1%); T15(9%); T18(4%); T19(2%); T20(2%); T21(6%); T9(4%); |
| ST44 | 4.05 | 296 | 0.003 | S8(22%); S9(1%); T11(3%); T12(6%); T14(2%); T15(12%); T16(10%); T18(14%); T19(3%); T20(5%); T21(5%); T25(2%);               |
| ST45 | 4.06 | 296 | 0.008 | S10(1%); S8(11%); T12(19%); T14(4%); T15(25%); T16(7%); T17(3%); T18(9%); T20(5%); T25(2%); T26(1%);                        |
| ST46 | 4.07 | 295 | 0.009 | S4(3%); S8(14%); T11(6%); T12(18%); T14(1%); T15(22%); T16(5%); T18(4%); T20(4%); T21(2%); T9(5%);                          |
| ST47 | 4.08 | 294 | 0.003 | S8(1%); T12(19%); T14(1%); T15(38%); T17(2%); T18(3%); T19(2%); T20(11%); T21(10%);                                         |
| ST48 | 4.12 | 292 | 0.000 | S8(13%); S9(2%); T10(2%); T12(5%); T15(12%); T16(10%); T17(7%); T18(14%); T19(3%); T20(8%); T21(9%); T25(3%);               |
| ST49 | 4.13 | 290 | 0.000 | S26(3%); T12(7%); T15(21%); T16(18%); T17(5%); T18(21%); T19(2%); T20(5%); T21(7%);                                         |
| ST50 | 4.19 | 286 | 0.014 | S12(1%); S3(4%); S4(4%); S5(3%); S6(3%); S9(9%); T10(35%); T12(1%); T13(7%); T15(7%); T19(7%); T7(3%);                      |
| ST51 | 4.25 | 282 | 0.069 | S10(4%); S11(20%); S7(10%); S9(14%); T11(4%); T12(4%); T14(18%); T15(4%); T16(1%); T17(1%);                                 |
| ST52 | 4.28 | 280 | 0.006 | S20(6%); S22(5%); S6(2%); T10(2%); T13(17%); T14(4%); T15(7%); T16(25%); T18(8%); T19(3%); T21(1%);                         |
| ST53 | 4.29 | 280 | 0.005 | S10(3%); S6(2%); S7(1%); T10(10%); T12(3%); T13(26%); T14(3%); T15(3%); T16(11%); T17(5%);                                  |

|      |      |     |       |                                                                                                                                                                                   |
|------|------|-----|-------|-----------------------------------------------------------------------------------------------------------------------------------------------------------------------------------|
| ST54 | 4.30 | 279 | 0.008 | T18(4%); T19(5%); T21(4%); T7(3%); T9(3%);<br>S10(2%); S11(7%); S6(7%); S8(1%); T10(2%); T12(3%);<br>T13(16%); T14(10%); T15(3%); T16(11%); T17(2%);<br>T18(5%); T19(6%); T7(2%); |
| ST55 | 4.31 | 278 | 0.001 | S16(10%); S22(1%); S7(1%); T11(3%); T12(4%);<br>T13(5%); T14(21%); T16(5%); T17(3%); T18(9%);<br>T20(11%); T21(5%); T25(2%);                                                      |
| ST56 | 4.32 | 278 | 0.013 | S12(7%); S16(8%); S9(4%); T10(6%); T13(19%);<br>T14(1%); T16(7%); T17(4%); T18(4%); T19(15%);<br>T20(6%); T25(3%); T7(1%);                                                        |
| ST57 | 4.35 | 276 | 0.001 | S10(11%); S13(1%); S20(3%); T11(2%); T13(10%);<br>T14(5%); T15(9%); T16(7%); T17(8%); T18(1%);<br>T19(12%); T20(6%); T21(3%); T9(2%);                                             |
| ST58 | 4.37 | 275 | 0.001 | S10(3%); S11(5%); S5(2%); S7(2%); S8(1%); T11(1%);<br>T12(4%); T13(7%); T14(15%); T15(2%); T16(5%);<br>T17(4%); T18(4%); T19(9%); T20(8%); T21(7%);<br>T9(6%);                    |
| ST59 | 4.39 | 273 | 0.001 | S10(1%); S16(5%); S9(2%); T13(3%); T14(7%);<br>T15(4%); T16(15%); T17(4%); T18(17%); T19(12%);<br>T20(2%); T21(8%); T9(1%);                                                       |
| ST60 | 4.40 | 273 | 0.010 | S10(3%); S11(4%); S20(1%); S22(2%); S6(2%); S8(1%);<br>S9(1%); T11(4%); T14(13%); T15(6%); T16(5%);<br>T17(15%); T18(7%); T19(10%); T21(1%); T25(2%);<br>T9(2%);                  |

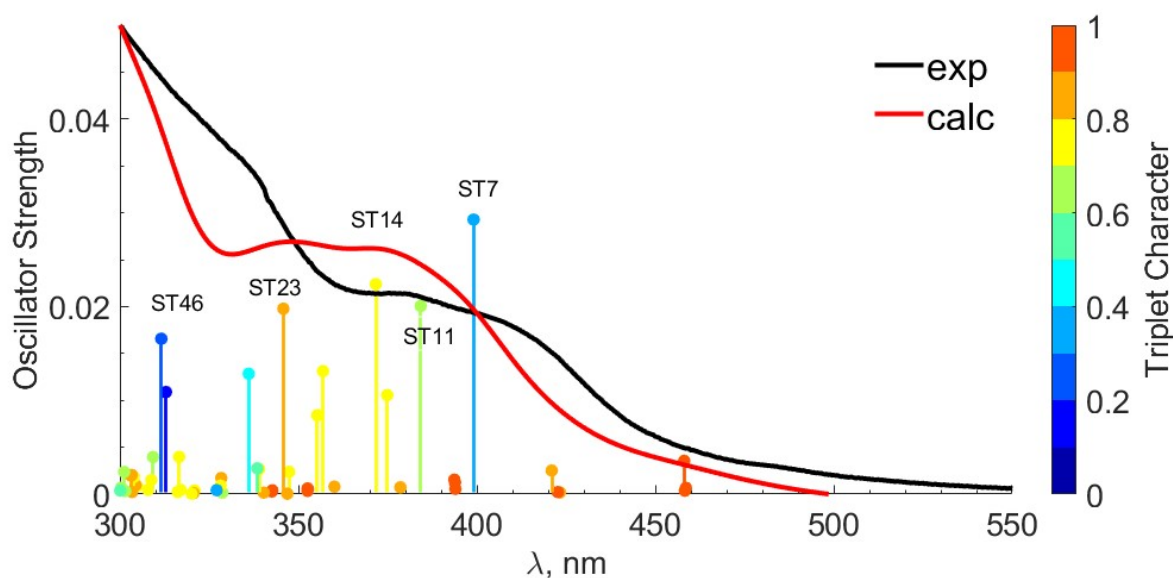

**Figure S26.** Experimental (black line) and the SOC-TDDFT calculated absorption (red line) spectra for  $[3 \cdot \text{Hg}_3]$ : excitation energies and oscillator strengths are shown by the vertical lines; the spectrum is convoluted with a Lorentzian function having a full width at half-maximum of  $0.35 \text{ cm}^{-1}$ .

**Table S9.** Excitation wavelengths (nm), oscillator strengths (f) and contributions of scalar relativistic (SR) states for  $[3 \cdot \text{Hg}_3]$  calculated with SR-TDDFT and SOC-TDDFT.

| SR States (TDDFT Singlet-Singlet Excitations) |            |                      |       |                                                                                                  |
|-----------------------------------------------|------------|----------------------|-------|--------------------------------------------------------------------------------------------------|
| State                                         | Energy(eV) | $\lambda(\text{nm})$ | f     | Transitions                                                                                      |
| S1                                            | 3.04       | 395                  | 0.038 | H-1 $\rightarrow$ L (18%); H $\rightarrow$ L (79%);                                              |
| S2                                            | 3.30       | 364                  | 0.033 | H-2 $\rightarrow$ L (4%); H-1 $\rightarrow$ L (74%); H $\rightarrow$ L (16%);                    |
| S3                                            | 3.40       | 353                  | 0.022 | H-3 $\rightarrow$ L (5%); H-2 $\rightarrow$ L (83%); H-1 $\rightarrow$ L (2%); H $\rightarrow$ L |

|                                                      |      |     |       |                                                                                                                                                                                                                                |
|------------------------------------------------------|------|-----|-------|--------------------------------------------------------------------------------------------------------------------------------------------------------------------------------------------------------------------------------|
|                                                      |      |     |       | (3%);                                                                                                                                                                                                                          |
| S4                                                   | 3.64 | 330 | 0.003 | H-3 → L (3%); H-1 → L+1 (5%); H → L+1 (84%); H → L+2 (3%);                                                                                                                                                                     |
| S5                                                   | 3.76 | 319 | 0.025 | H-5 → L (2%); H-4 → L (8%); H-3 → L (52%); H-2 → L (6%); H-1 → L+1 (2%); H-1 → L+2 (5%); H → L+1 (10%); H → L+2 (8%);                                                                                                          |
| S6                                                   | 3.80 | 315 | 0.018 | H-3 → L (7%); H-1 → L+1 (4%); H → L+2 (82%); H-2 → L (6%); H-1 → L+1 (2%); H-1 → L+2 (5%); H → L+1 (10%); H → L+2 (8%);                                                                                                        |
| S7                                                   | 3.90 | 308 | 0.015 | H-4 → L (35%); H-3 → L (22%); H-2 → L+1 (2%); H-1 → L+1 (31%); H-1 → L+1 (2%); H-1 → L+2 (5%); H → L+1 (10%); H → L+2 (8%);                                                                                                    |
| S8                                                   | 3.95 | 304 | 0.002 | H-4 → L (42%); H-2 → L+1 (6%); H-1 → L+1 (42%); H-1 → L+1 (31%); H-1 → L+1 (2%); H-1 → L+2 (5%); H → L+1 (10%); H → L+2 (8%);                                                                                                  |
| S9                                                   | 3.96 | 303 | 0.015 | H-7 → L (2%); H-5 → L (83%); H-3 → L (4%); H-2 → L+1 (3%); H-1 → L+1 (2%); H-1 → L+2 (5%); H → L+1 (10%); H → L+2 (8%);                                                                                                        |
| S10                                                  | 4.00 | 300 | 0.000 | H-11 → L (30%); H-10 → L (40%); H-9 → L (9%); H-8 → L (3%); H-6 → L (4%); H-2 → L+1 (4%); H → L+1 (10%); H → L+2 (8%);                                                                                                         |
| S11                                                  | 4.03 | 298 | 0.002 | H-10 → L (9%); H-8 → L (4%); H-6 → L (11%); H-5 → L (7%); H-4 → L (3%); H-2 → L+1 (34%); H-1 → L+2 (18%); H → L+4 (4%);                                                                                                        |
| S12                                                  | 4.04 | 297 | 0.011 | H-8 → L (2%); H-4 → L (3%); H-1 → L+2 (3%); H → L+3 (25%); H → L+4 (23%); H → L+5 (32%); H-1 → L+2 (18%); H → L+4 (4%);                                                                                                        |
| S13                                                  | 4.08 | 294 | 0.000 | H-11 → L (3%); H-8 → L (3%); H-7 → L (2%); H-2 → L+1 (28%); H-2 → L+2 (4%); H-1 → L+1 (4%); H-1 → L+2 (48%); H → L+4 (4%);                                                                                                     |
| S14                                                  | 4.10 | 293 | 0.021 | H-9 → L (2%); H-8 → L (6%); H-6 → L (59%); H-2 → L+1 (11%); H-1 → L+2 (5%); H → L+4 (3%); H-1 → L+2 (48%); H → L+4 (4%);                                                                                                       |
| S15                                                  | 4.13 | 291 | 0.013 | H-9 → L (3%); H-8 → L (30%); H-7 → L (26%); H-6 → L (7%); H-3 → L+1 (4%); H-2 → L+2 (2%); H-1 → L+2 (3%); H → L+3 (8%); H → L+5 (5%);                                                                                          |
| <b>SR States (TDDFT Singlet-Triplet Excitations)</b> |      |     |       |                                                                                                                                                                                                                                |
| T1                                                   | 2.53 | 475 | 0.001 | H-6 → L (3%); H-2 → L (12%); H-1 → L (37%); H → L (25%);                                                                                                                                                                       |
| T2                                                   | 2.80 | 428 | 0.000 | H-9 → L (2%); H-2 → L (4%); H-1 → L (5%); H → L (60%); H → L+5 (2%);                                                                                                                                                           |
| T3                                                   | 2.94 | 409 | 0.004 | H-1 → L+5 (13%); H → L (3%); H → L+2 (2%); H → L+3 (5%); H → L+4 (5%); H → L+5 (45%); H → L+6 (5%);                                                                                                                            |
| T4                                                   | 3.12 | 385 | 0.000 | H-2 → L (41%); H-1 → L (31%); H → L+2 (2%); H → L+3 (5%); H → L+4 (5%); H → L+5 (45%); H → L+6 (5%);                                                                                                                           |
| T5                                                   | 3.19 | 376 | 0.000 | H-11 → L (3%); H-10 → L (3%); H-6 → L (5%); H-4 → L (9%); H-3 → L (22%); H-2 → L (13%); H → L+1 (8%); H → L+2 (7%);                                                                                                            |
| T6                                                   | 3.28 | 366 | 0.003 | H-12 → L+8 (4%); H-8 → L+9 (3%); H-7 → L+3 (3%); H-5 → L+3 (6%); H-5 → L+4 (4%); H-4 → L (5%); H-4 → L+4 (7%); H-3 → L+6 (5%); H-3 → L+11 (3%);                                                                                |
| T7                                                   | 3.34 | 359 | 0.029 | H-3 → L (4%); H-3 → L+2 (2%); H-2 → L (6%); H-2 → L+1 (3%); H-2 → L+2 (4%); H-1 → L (11%); H-1 → L+1 (8%); H-1 → L+2 (8%); H → L+1 (15%); H → L+2 (14%);                                                                       |
| T8                                                   | 3.38 | 355 | 0.001 | H-12 → L+4 (4%); H-9 → L+3 (2%); H-9 → L+8 (2%); H-8 → L+8 (3%); H-7 → L+3 (4%); H-7 → L+4 (5%); H-7 → L+6 (2%); H-6 → L+9 (3%); H-5 → L+3 (6%); H-4 → L (2%); H-4 → L+9 (4%); H-3 → L+10 (3%); H-3 → L+11 (6%); H-2 → L (3%); |
| T9                                                   | 3.38 | 355 | 0.001 | H-13 → L+3 (3%); H-12 → L+3 (6%); H-9 → L+3 (2%);                                                                                                                                                                              |



|                                       |             |        |       | H-9 → L+4 (4%); H-8 → L+3 (3%); H-7 → L+4 (3%); H-7 → L+8 (5%); H-5 → L (2%); H-5 → L+8 (3%); H-5 → L+9 (8%); H-4 → L+6 (2%); H-2 → L (3%); H-3 → L+11 (6%); H-2 → L (3%);                                      |
|---------------------------------------|-------------|--------|-------|-----------------------------------------------------------------------------------------------------------------------------------------------------------------------------------------------------------------|
| T10                                   | 3.55        | 338    | 0.002 | H-6 → L (3%); H-5 → L (4%); H-4 → L (3%); H-3 → L (14%); H-3 → L+1 (2%); H-2 → L (3%); H-1 → L+4 (3%); H-1 → L+7 (4%); H → L+1 (7%); H → L+4 (7%); H → L+6 (4%); H → L+7 (8%); H-3 → L+11 (6%); H-2 → L (3%);   |
| T11                                   | 3.70        | 324    | 0.020 | H-11 → L (2%); H-8 → L (3%); H-1 → L+1 (3%); H-1 → L+2 (11%); H → L (3%); H → L+1 (35%); H → L+2 (24%); H-1 → L+7 (4%); H → L+1 (7%); H → L+4 (7%); H → L+6 (4%); H → L+7 (8%); H-3 → L+11 (6%); H-2 → L (3%);  |
| T12                                   | 3.72        | 322    | 0.001 | H-11 → L (4%); H-10 → L (4%); H-8 → L (5%); H-7 → L (3%); H-1 → L (6%); H-1 → L+1 (18%); H → L (3%); H → L+1 (16%); H → L+2 (9%); H → L+4 (7%); H → L+6 (4%); H → L+7 (8%); H-3 → L+11 (6%); H-2 → L (3%);      |
| T13                                   | 3.82        | 314    | 0.011 | H-5 → L (40%); H-5 → L+3 (3%); H-3 → L (10%); H-1 → L+1 (14%); H → L+1 (3%); H → L+2 (6%); H → L (3%); H → L+1 (16%); H → L+2 (9%); H → L+4 (7%); H → L+6 (4%); H → L+7 (8%); H-3 → L+11 (6%); H-2 → L (3%);    |
| T14                                   | 3.84        | 313    | 0.022 | H-8 → L (3%); H-6 → L (2%); H-5 → L+3 (4%); H-5 → L+8 (3%); H-4 → L (36%); H-3 → L (23%); H-3 → L+4 (6%); H → L+1 (16%); H → L+2 (9%); H → L+4 (7%); H → L+6 (4%); H → L+7 (8%); H-3 → L+11 (6%); H-2 → L (3%); |
| T15                                   | 3.86        | 311    | 0.001 | H-9 → L (3%); H-7 → L (3%); H-5 → L (23%); H-1 → L+1 (25%); H-1 → L+4 (3%); H-1 → L+5 (3%); H → L+1 (6%); H → L+2 (9%); H → L+2 (9%); H → L+4 (7%); H → L+6 (4%); H → L+7 (8%); H-3 → L+11 (6%); H-2 → L (3%);  |
| <b>States calculated by SOC-TDDFT</b> |             |        |       |                                                                                                                                                                                                                 |
| State                                 | Energy (eV) | λ (nm) | f     | Component Scalar Transitions                                                                                                                                                                                    |
| ST1                                   | 2.62        | 459    | 0.001 | T1(95%); T2(1%);                                                                                                                                                                                                |
| ST2                                   | 2.62        | 458    | 0.000 | T1(96%);                                                                                                                                                                                                        |
| ST3                                   | 2.62        | 458    | 0.004 | T1(96%);                                                                                                                                                                                                        |
| ST4                                   | 2.83        | 423    | 0.000 | S1(1%); T2(83%); T4(8%); T5(2%);                                                                                                                                                                                |
| ST5                                   | 2.84        | 423    | 0.000 | T2(81%); T4(11%); T5(4%);                                                                                                                                                                                       |
| ST6                                   | 2.85        | 421    | 0.003 | S2(3%); S3(6%); T2(86%);                                                                                                                                                                                        |
| ST7                                   | 3.01        | 399    | 0.029 | S1(63%); T4(23%); T5(5%);                                                                                                                                                                                       |
| ST8                                   | 3.05        | 394    | 0.001 | T2(2%); T3(94%);                                                                                                                                                                                                |
| ST9                                   | 3.05        | 394    | 0.001 | T2(2%); T3(95%);                                                                                                                                                                                                |
| ST10                                  | 3.05        | 394    | 0.002 | T3(97%);                                                                                                                                                                                                        |
| ST11                                  | 3.12        | 384    | 0.020 | S1(1%); S2(13%); S3(8%); T4(59%); T5(9%);                                                                                                                                                                       |
| ST12                                  | 3.17        | 379    | 0.001 | T1(1%); T2(4%); T3(2%); T4(52%); T5(26%); T7(6%);                                                                                                                                                               |
| ST13                                  | 3.20        | 375    | 0.011 | S1(9%); S3(5%); T2(4%); T4(39%); T5(32%); T7(4%);                                                                                                                                                               |
| ST14                                  | 3.23        | 372    | 0.022 | S1(1%); S2(16%); S3(2%); T4(11%); T5(57%); T7(5%);                                                                                                                                                              |
| ST15                                  | 3.33        | 360    | 0.001 | T4(15%); T5(56%); T7(19%);                                                                                                                                                                                      |
| ST16                                  | 3.36        | 357    | 0.013 | S1(7%); S2(3%); S3(1%); T4(8%); T5(39%); T7(32%);                                                                                                                                                               |
| ST17                                  | 3.38        | 355    | 0.008 | S2(10%); S3(4%); T5(22%); T6(4%); T7(51%);                                                                                                                                                                      |
| ST18                                  | 3.40        | 353    | 0.001 | T6(98%);                                                                                                                                                                                                        |
| ST19                                  | 3.40        | 353    | 0.001 | T6(98%);                                                                                                                                                                                                        |
| ST20                                  | 3.40        | 353    | 0.000 | T6(95%); T7(3%);                                                                                                                                                                                                |
| ST21                                  | 3.45        | 347    | 0.002 | S1(3%); S2(4%); S3(6%); T4(13%); T5(7%); T7(19%); T8(28%); T9(14%);                                                                                                                                             |
| ST22                                  | 3.46        | 347    | 0.000 | T4(9%); T5(4%); T7(45%); T8(24%); T9(10%);                                                                                                                                                                      |
| ST23                                  | 3.47        | 346    | 0.020 | S2(5%); S3(4%); T4(7%); T5(3%); T7(15%); T8(45%); T9(17%);                                                                                                                                                      |

|      |      |     |       |                                                                                                                                             |
|------|------|-----|-------|---------------------------------------------------------------------------------------------------------------------------------------------|
| ST24 | 3.50 | 343 | 0.000 | T7(1%); T8(43%); T9(52%);                                                                                                                   |
| ST25 | 3.50 | 343 | 0.000 | T7(2%); T8(47%); T9(50%);                                                                                                                   |
| ST26 | 3.50 | 343 | 0.000 | T8(36%); T9(62%);                                                                                                                           |
| ST27 | 3.53 | 340 | 0.000 | T4(4%); T5(2%); T7(20%); T8(26%); T9(38%);                                                                                                  |
| ST28 | 3.54 | 339 | 0.003 | S1(8%); S2(1%); S3(1%); T4(6%); T5(4%); T7(19%);<br>T8(25%); T9(21%);                                                                       |
| ST29 | 3.54 | 339 | 0.003 | S2(31%); T10(2%); T2(4%); T4(2%); T5(5%); T7(12%);<br>T8(13%); T9(23%);                                                                     |
| ST30 | 3.57 | 336 | 0.013 | S2(1%); S3(42%); T10(8%); T2(2%); T4(5%); T7(18%);<br>T8(5%); T9(4%);                                                                       |
| ST31 | 3.65 | 329 | 0.000 | S2(1%); S4(18%); T10(66%); T11(3%); T12(1%);                                                                                                |
| ST32 | 3.65 | 328 | 0.002 | T10(85%); T12(3%);                                                                                                                          |
| ST33 | 3.66 | 328 | 0.001 | S3(4%); S4(4%); T10(74%); T11(5%); T12(3%);                                                                                                 |
| ST34 | 3.67 | 327 | 0.000 | S4(48%); T10(22%); T11(9%); T13(1%); T15(2%);<br>T16(2%); T17(2%);                                                                          |
| ST35 | 3.74 | 321 | 0.000 | S4(2%); T10(5%); T11(63%); T12(8%); T17(6%);                                                                                                |
| ST36 | 3.74 | 321 | 0.000 | T10(7%); T11(64%); T12(7%); T13(2%); T16(3%);<br>T17(5%);                                                                                   |
| ST37 | 3.75 | 320 | 0.000 | S11(3%); S14(1%); S4(6%); S7(2%); S8(2%); T10(6%);<br>T11(55%); T12(13%);                                                                   |
| ST38 | 3.79 | 317 | 0.000 | S13(4%); S6(1%); S8(2%); T10(2%); T11(8%);<br>T12(66%);                                                                                     |
| ST39 | 3.79 | 317 | 0.004 | S5(1%); S6(5%); T11(6%); T12(62%); T13(3%);<br>T15(4%); T16(5%); T17(2%); T20(1%);                                                          |
| ST40 | 3.79 | 316 | 0.000 | S4(3%); S5(1%); T11(13%); T12(60%); T13(2%);<br>T15(2%); T16(3%); T20(3%);                                                                  |
| ST41 | 3.84 | 313 | 0.011 | S5(22%); S6(50%); T12(4%); T19(2%); T20(4%);<br>T26(3%); T28(2%);                                                                           |
| ST42 | 3.85 | 312 | 0.017 | S11(2%); S5(44%); S6(15%); S7(2%); S8(1%); T11(3%);<br>T12(2%); T13(3%); T15(7%); T17(5%);                                                  |
| ST43 | 3.88 | 309 | 0.004 | S4(2%); S5(2%); S7(3%); S8(3%); T11(4%); T12(4%);<br>T13(26%); T15(26%); T16(3%); T17(5%); T20(3%);<br>T21(1%);                             |
| ST44 | 3.89 | 309 | 0.002 | T11(3%); T12(7%); T13(29%); T15(27%); T17(3%);<br>T20(4%); T22(1%);                                                                         |
| ST45 | 3.90 | 308 | 0.000 | S10(2%); S6(1%); S7(3%); S8(3%); T12(7%); T13(28%);<br>T15(24%); T16(5%); T17(8%); T20(3%);                                                 |
| ST46 | 3.92 | 306 | 0.021 | S11(2%); S13(1%); S19(1%); S5(12%); S6(5%); S7(9%);<br>S8(4%); T12(4%); T13(10%); T14(11%); T15(10%);<br>T16(6%); T17(9%);                  |
| ST47 | 3.94 | 305 | 0.001 | S11(2%); S5(1%); S8(2%); T13(46%); T14(3%);<br>T15(21%); T16(5%); T17(5%);                                                                  |
| ST48 | 3.94 | 304 | 0.001 | T13(42%); T14(22%); T15(15%); T16(4%); T17(6%);                                                                                             |
| ST49 | 3.95 | 304 | 0.002 | S10(4%); S5(2%); T13(31%); T14(18%); T15(27%);<br>T16(3%); T21(2%);                                                                         |
| ST50 | 3.96 | 303 | 0.000 | T14(88%); T15(4%);                                                                                                                          |
| ST51 | 3.96 | 303 | 0.002 | T13(12%); T14(68%); T15(9%);                                                                                                                |
| ST52 | 3.96 | 303 | 0.002 | S8(1%); T13(6%); T14(71%); T15(8%); T17(3%);                                                                                                |
| ST53 | 3.98 | 302 | 0.000 | S12(1%); S13(4%); T13(4%); T16(29%); T17(1%);<br>T18(3%); T20(4%); T21(12%); T25(3%); T26(3%);<br>T28(8%);                                  |
| ST54 | 3.98 | 301 | 0.002 | S7(2%); T13(6%); T14(1%); T16(28%); T17(5%);<br>T18(4%); T19(1%); T20(4%); T21(8%); T25(4%);<br>T26(2%); T28(8%);                           |
| ST55 | 3.99 | 300 | 0.001 | S12(3%); S5(1%); S7(7%); T11(1%); T15(2%); T16(8%);<br>T17(17%); T18(4%); T19(3%); T20(7%); T21(5%);<br>T24(3%); T26(3%); T28(6%); T30(3%); |
| ST56 | 4.00 | 300 | 0.000 | S11(2%); S12(6%); S7(6%); S8(1%); S9(3%); T15(1%);<br>T17(21%); T18(5%); T19(2%); T21(16%); T22(1%);<br>T25(1%); T28(5%);                   |
| ST57 | 4.00 | 300 | 0.002 | S12(4%); S7(3%); S8(1%); T15(8%); T16(9%);                                                                                                  |

|      |      |     |       |                                                                                                                                                                                   |
|------|------|-----|-------|-----------------------------------------------------------------------------------------------------------------------------------------------------------------------------------|
|      |      |     |       | T17(27%); T18(12%); T19(2%); T20(3%); T21(9%);                                                                                                                                    |
| ST58 | 4.01 | 299 | 0.004 | S10(7%); S11(2%); S13(1%); S8(4%); S9(5%); T15(8%);<br>T16(18%); T17(9%); T18(13%); T19(1%); T21(10%);                                                                            |
| ST59 | 4.02 | 298 | 0.009 | S10(6%); S11(1%); S12(2%); S13(3%); S14(2%);<br>S15(3%); S19(2%); S7(3%); S8(14%); S9(1%); T15(2%);<br>T16(5%); T17(4%); T18(9%); T19(5%); T21(5%);<br>T26(2%); T28(5%); T30(2%); |
| ST60 | 4.03 | 298 | 0.001 | S10(6%); S11(3%); S12(23%); S13(5%); S7(2%);<br>S8(7%); S9(1%); T17(6%); T20(3%); T22(2%); T25(2%);<br>T26(2%); T28(10%); T30(1%);                                                |

## Theoretical background of radiative and nonradiative rate constants calculations

To calculate a radiative ( $k_r$ )<sup>1</sup> and nonradiative ( $k_{nr}$ )<sup>2</sup> rate constants we used methodology described earlier using eq. (1) and (4):

$$k_r^\alpha(T_1 \rightarrow S_0) = \frac{8\pi^2 \eta^3 \langle \tilde{\nu}^3 \rangle_{fcf}}{3\epsilon_0 \hbar} \left| M_T^\alpha(Q_0^{T_1}) \right|^2 \quad (1)$$

$$M_T^\alpha(Q_0^{T_1}) = \sum_{j \in x,y,z} \left| \sum_m \frac{\langle T_1^\alpha | H_{SOC} | S_m \rangle}{E(S_m) - E(T_1)} M_{S_m,j}(Q_0^{T_1}) \right|^2 \quad (2)$$

$$k_r = \frac{k_r^1 + k_r^2 \exp\left(\frac{-ZFS_{1,2}}{k_B T}\right) + k_r^3 \exp\left(\frac{-ZFS_{1,3}}{k_B T}\right)}{1 + \exp\left(\frac{-ZFS_{1,2}}{k_B T}\right) + \exp\left(\frac{-ZFS_{1,3}}{k_B T}\right)} \quad (3)$$

where  $\eta$  is the refractive index of the solvent,  $\hbar$  is reduced Planck's constant, and  $\epsilon_0$  is the permittivity of vacuum,  $\langle \tilde{\nu}^3 \rangle_{fcf}$  is the transition energy of the  $T_1$  excited state (in  $\text{cm}^{-1}$ ), and  $M_T^\alpha(Q_0^{T_1})$  is the transition dipole moment of the  $T_1 \rightarrow S_0$  transition,  $M_{S_m,j}(Q_0^{T_1})$  is the  $j$ -axis projection of the  $S_m \rightarrow S_0$  transition dipole moment

$$k_{nr}(T_1 \rightarrow S_0)$$

$$= \frac{2\pi}{\hbar} \times \frac{\langle T_1 | H_{SOC} | S_0 \rangle^2}{\sqrt{2\pi\hbar^2(D_1^2 + P^2)}} \times \exp\left(-\frac{(E_{0-0} - n_M \hbar\omega_M - \lambda_1 - \mu)^2}{2\pi\hbar^2(D_1^2 + P^2)}\right) \times \exp(-S_M) \times$$

$$\hbar^2 D_1^2 = \sum_{j \in hf} S_j \left(\frac{\hbar\omega_j^S}{b_j}\right)^2 \coth \frac{\hbar\omega_j^T}{2k_B T} \quad (5)$$

$$\hbar^2 P^2 = \frac{1}{2} \sum_{j \in hf} \left[ \hbar\omega_j^S \frac{1-b_j^2}{b_j} \coth \frac{\hbar\omega_j^T}{2k_B T} \right]^2 \quad (6)$$

$$\lambda_M = \sum_{j \in hf} S_j \hbar\omega_j \quad (7)$$

$$\hbar\omega_M = \frac{\lambda_M}{S_M} \quad (8)$$

$$\lambda_1 = \sum_{j \in hf} \frac{S_j \hbar\omega_j^S}{b_j} \quad (9)$$

$$\mu = \frac{1}{2} \sum_{j \in hf} \hbar\omega_j^S \frac{1-b_j^2}{b_j} \coth \frac{\hbar\omega_j^T}{2k_B T} \quad (10)$$

$$n_M = \frac{\Delta E_{00} - \lambda_1 - \mu}{\hbar\omega_M} \quad (11)$$

$$S_M = \sum_{j \in hf} S_j \quad (12)$$

$$S_j = \frac{1}{2} \left( \frac{m_j \omega_j}{\hbar} \right) \quad (13)$$

where  $S$  is the Huang–Rhys factor,  $m_j$  is the reduced mass of the  $j$ th normal mode,  $\Delta Q_j$  represents the equilibrium displacement along the  $j$ th normal mode coordinate;  $\omega_j^{S(T)}$  is the frequency of the  $j$ th normal mode of the  $S_0$  ( $T_1$ ) state,  $\Delta E_{0-0}$  is the zero-point energy difference between the  $T_1$  excited

state and the  $S_0$  ground state. hf and lf designate the high-frequency ligand skeletal modes ( $2000 > \omega_{\text{hf}} > 1000 \text{ cm}^{-1}$ ) and low-frequency modes  $200 < \omega_{\text{lf}} \leq 1000 \text{ cm}^{-1}$ .

**Table S8.** Values of calculated parameters and  $k_{\text{nr}}$  at 298K using eq. (4)

|                                                              | <b>3</b>           | <b>3·Hg<sub>3</sub></b> |
|--------------------------------------------------------------|--------------------|-------------------------|
| $\langle S_0   H_{\text{SO}}   T_1 \rangle, \text{ cm}^{-1}$ | 148.7              | 147.9                   |
| $S_M$                                                        | 1.22               | 1.06                    |
| $S_{\text{lf}}$                                              | 0.60               | 0.59                    |
| $\hbar\omega_M, \text{ cm}^{-1}$                             | 1416               | 1396                    |
| $\lambda_M, \text{ cm}^{-1}$                                 | 1727               | 1483                    |
| $\lambda_{\text{lf}}, \text{ cm}^{-1}$                       | 336                | 312                     |
| $\lambda_1, \text{ cm}^{-1}$                                 | 364                | 332                     |
| $\mu, \text{ cm}^{-1}$                                       | 946                | 915                     |
| $\hbar^2 D_1^2, \text{ cm}^{-2}$                             | $2.74 \times 10^5$ | $2.40 \times 10^5$      |
| $\hbar^2 P^2, \text{ cm}^{-2}$                               | $7.40 \times 10^4$ | $7.35 \times 10^4$      |
| $n_M$                                                        | 13                 | 13                      |
| $k_{\text{nr}}$                                              | $7.8 \times 10^4$  | $7.1 \times 10^3$       |

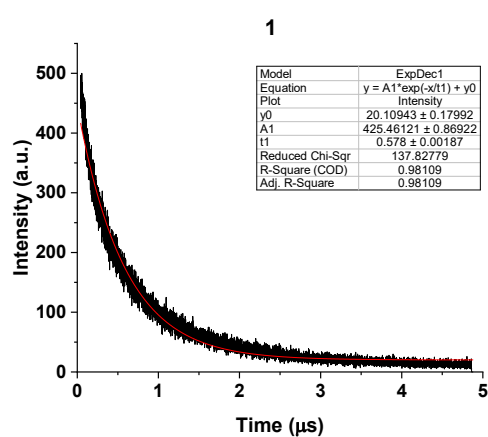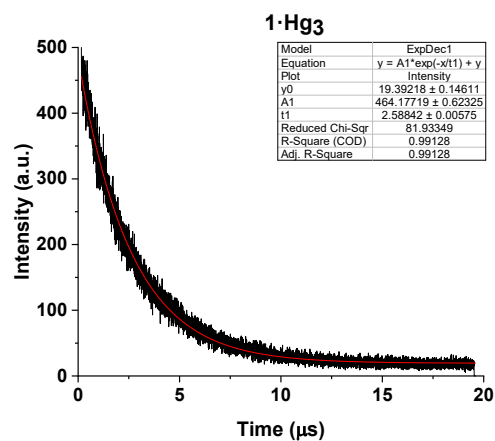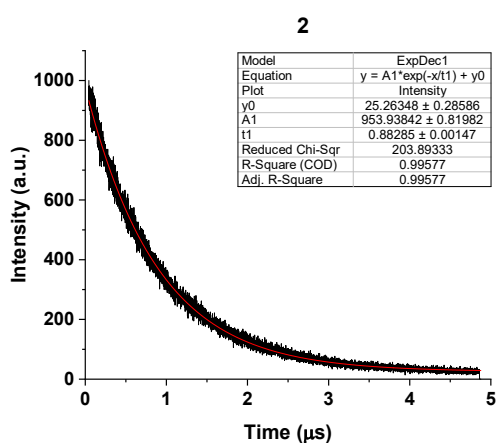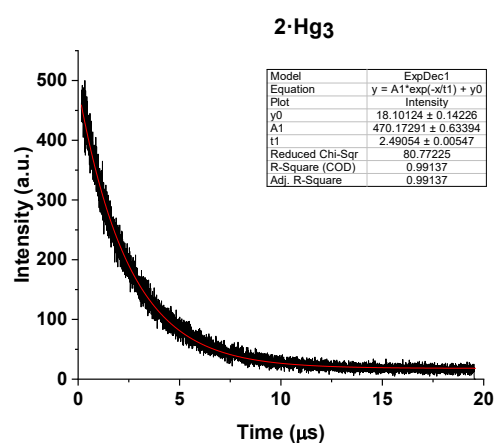

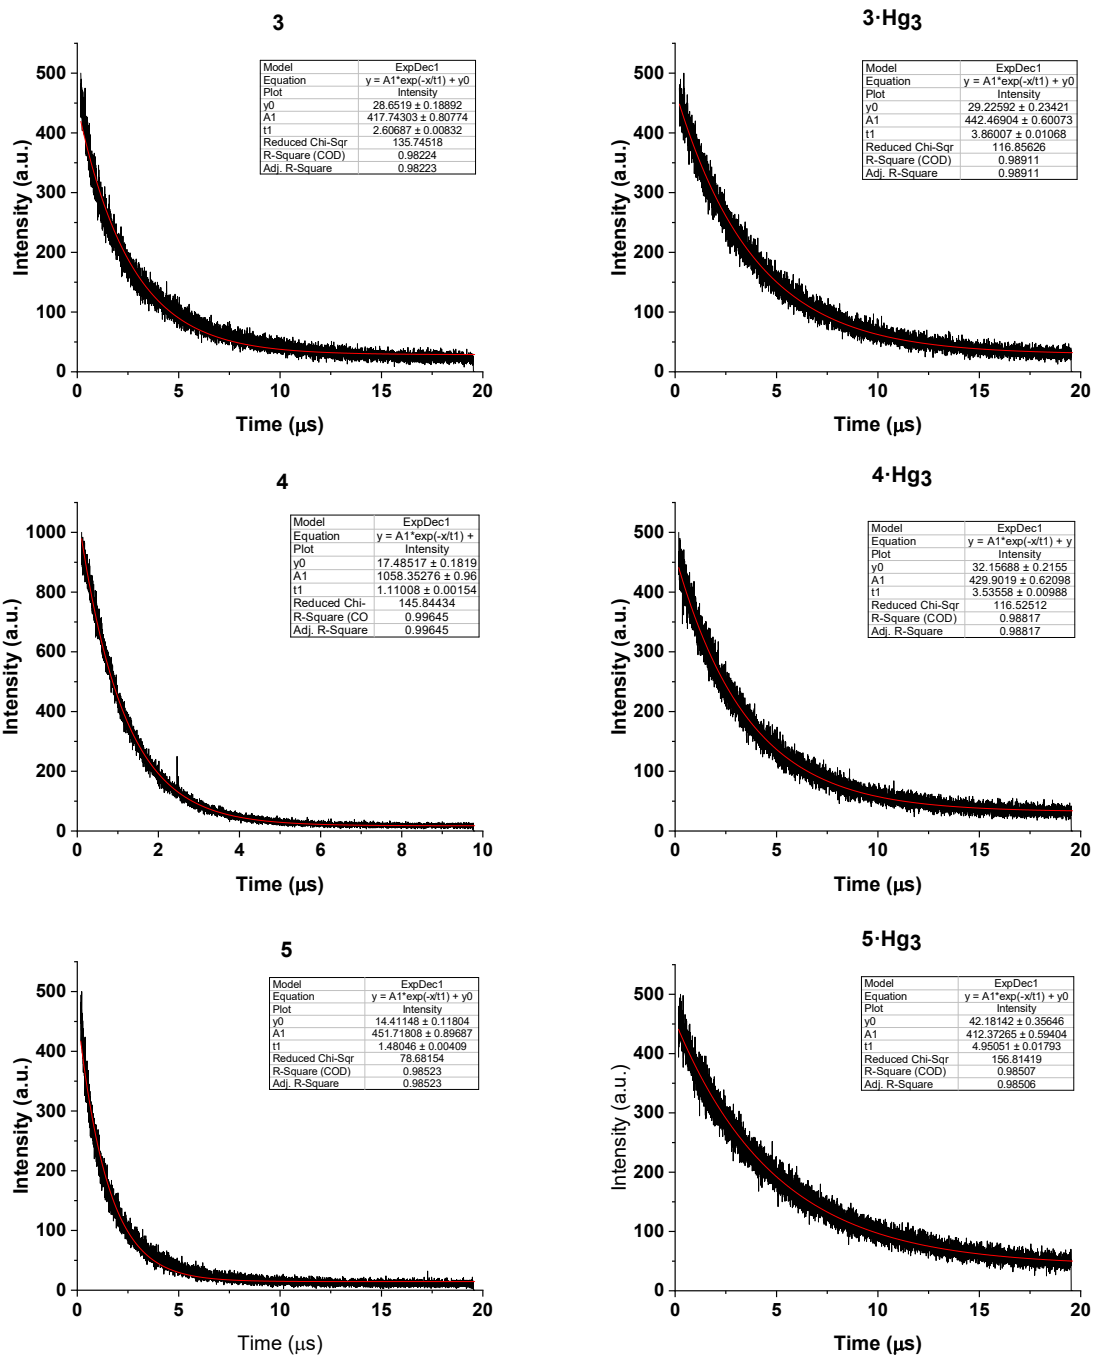

**Figure S27.** Photoluminescence experimental (black) and fitted (red) decay curves of parent platinum complexes and their adducts in solid state at 298 K.

## Cartesian coordinates for the studied molecules

Cartesian coordinate for [1·Hg<sub>3</sub>]<sup>a</sup> (in Å)

|    |                   |                   |                   |
|----|-------------------|-------------------|-------------------|
| Hg | 27.05161993877753 | 12.00436244608024 | 10.27745881820301 |
| Hg | 28.83894763506038 | 12.25860732442861 | 7.16119680678286  |
| Hg | 30.58906288397720 | 11.24455234422889 | 10.14598105194736 |
| Pt | 28.08583150801153 | 8.86609429899017  | 8.30953672994455  |
| F  | 24.06262444408954 | 12.72187295236358 | 9.66820759060930  |
| F  | 22.73755603248919 | 13.26751631708473 | 7.39320241561308  |
| F  | 24.05914201961127 | 13.39206180745705 | 5.03910061148354  |
| F  | 26.72332332152325 | 12.96344460966769 | 4.95577535121988  |
| F  | 30.90295845783867 | 12.14621264565643 | 4.81874480103811  |
| F  | 33.47751435598128 | 11.35582146902357 | 4.68409362013034  |
| F  | 34.81275867390509 | 10.68707887691831 | 6.93590675525206  |
| F  | 33.57355661252510 | 10.76633832500038 | 9.32376991688010  |
| F  | 31.40786619712993 | 10.30768850828022 | 13.01533281959152 |
| F  | 30.05145016961520 | 10.08086087597728 | 15.33788312992082 |
| F  | 27.42806266679850 | 10.71212521838727 | 15.44573558110247 |
| F  | 26.14395686461926 | 11.56003026827612 | 13.23505270875149 |
| O  | 27.68698091160752 | 8.51860538791919  | 10.23435086902676 |
| O  | 26.07997538114116 | 9.30033396333188  | 7.93032137805986  |
| N  | 28.63539491884874 | 9.11722015025500  | 6.41143451830161  |
| C  | 26.11676486527125 | 12.57529200078416 | 8.51672251598638  |
| C  | 24.75071136268212 | 12.80262208094396 | 8.52876099350119  |
| C  | 24.04152690121681 | 13.08212481945759 | 7.36303425503679  |
| C  | 24.72189767485705 | 13.13802932421552 | 6.14905769528779  |
| C  | 26.09810962646187 | 12.91644975883442 | 6.13110350320977  |
| C  | 26.80642332743686 | 12.64015429116085 | 7.28979741903741  |
| C  | 30.86657022283858 | 11.84022039879770 | 7.15733699084237  |
| C  | 31.53568903556690 | 11.81709342302566 | 5.94423373315236  |
| C  | 32.86887865239142 | 11.42485846845779 | 5.85356666686760  |
| C  | 33.55701628874248 | 11.07967363152445 | 7.01347490061525  |
| C  | 32.89379417609327 | 11.11814053128028 | 8.23813918651499  |
| C  | 31.55854042338266 | 11.47535324652831 | 8.32884724768266  |
| C  | 29.48934292824249 | 11.09406520328931 | 11.89736772858599 |
| C  | 30.12019154909039 | 10.63884578766444 | 13.04466288307684 |
| C  | 29.43869154995788 | 10.51184196859348 | 14.25465880895483 |
| C  | 28.08731157725418 | 10.84457011466207 | 14.31265081939309 |
| C  | 27.44800852880732 | 11.29252773013448 | 13.15925048110341 |

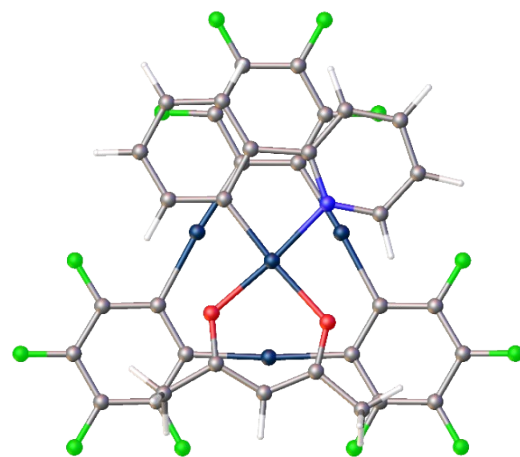

|   |                   |                   |                   |
|---|-------------------|-------------------|-------------------|
| C | 28.12096223132638 | 11.42577397295896 | 11.95544363362743 |
| C | 26.56526646417803 | 8.70496686955368  | 10.80681248698163 |
| C | 25.39183199417522 | 9.18032942888471  | 10.20132210660656 |
| H | 24.52541663923869 | 9.29908833035597  | 10.84755767233116 |
| C | 25.18734529484048 | 9.38778534959987  | 8.82020202513925  |
| C | 27.80181221242668 | 9.57017314188644  | 5.46317792990728  |
| H | 26.78235387543073 | 9.76322043492742  | 5.79266662206314  |
| C | 28.22819363735765 | 9.78868174188024  | 4.16346535238736  |
| H | 27.53143344417613 | 10.18490211436970 | 3.42985355717200  |
| C | 29.55729937156113 | 9.50598316387280  | 3.84134672300591  |
| H | 29.92903629665712 | 9.67578967646935  | 2.83281711230359  |
| C | 30.40917635100581 | 9.02400701174160  | 4.82434528819355  |
| H | 31.45319847771148 | 8.82132085461817  | 4.60042779100673  |
| C | 29.93860950573663 | 8.84469611646720  | 6.12827300328139  |
| C | 30.71664217767257 | 8.43446102094786  | 7.28890999038902  |
| C | 32.08494459680243 | 8.14249491362771  | 7.26711540710620  |
| H | 32.64380525116358 | 8.16676602804440  | 6.33221086952030  |
| C | 32.74652607157164 | 7.83516047444476  | 8.45154605125287  |
| H | 33.81495272623857 | 7.62984870801402  | 8.44118473369766  |
| C | 32.03553194226055 | 7.81045595943327  | 9.65466258907105  |
| H | 32.55439667443070 | 7.57476716130172  | 10.58321555981850 |
| C | 30.66740093014488 | 8.08878562036618  | 9.68177888488089  |
| H | 30.11607543814871 | 8.05168665301841  | 10.62071530308333 |
| C | 29.98550087748785 | 8.41398224132686  | 8.50226696706139  |
| C | 26.53648012641828 | 8.33574052759264  | 12.26091492333812 |
| H | 26.17671809147244 | 7.30324868883379  | 12.36240521331660 |
| H | 27.54796660748773 | 8.38987547231595  | 12.67175498112188 |
| H | 25.86766355779876 | 8.98916705688114  | 12.82838286727473 |
| C | 23.79887971851185 | 9.71036894765728  | 8.34492896361824  |
| H | 23.83490764281304 | 10.05003661071692 | 7.30693912163555  |
| H | 23.17203980469793 | 8.81116856022750  | 8.40210843781468  |
| H | 23.33797728520965 | 10.48095457898129 | 8.97077552928373  |



Cartesian coordinate for [1·Hg<sub>3</sub>]<sup>b</sup> (in Å)

|    |              |              |              |
|----|--------------|--------------|--------------|
| Hg | 27.069712000 | 11.917767000 | 10.331552000 |
| Hg | 28.772044000 | 12.292089000 | 7.171645000  |
| Hg | 30.620246000 | 11.267250000 | 10.142094000 |
| Pt | 26.214333000 | 9.006452000  | 9.645968000  |
| F  | 24.071128000 | 12.556910000 | 9.814289000  |
| F  | 22.663042000 | 13.148767000 | 7.588063000  |
| F  | 23.919783000 | 13.405676000 | 5.212935000  |
| F  | 26.596423000 | 13.085555000 | 5.052473000  |
| F  | 30.732399000 | 12.062427000 | 4.777569000  |
| F  | 33.305997000 | 11.262104000 | 4.560359000  |
| F  | 34.686360000 | 10.525606000 | 6.757928000  |
| F  | 33.507429000 | 10.575674000 | 9.185618000  |
| F  | 31.543757000 | 10.447928000 | 13.020014000 |
| F  | 30.197314000 | 10.054314000 | 15.328950000 |
| F  | 27.538681000 | 10.524362000 | 15.445822000 |
| F  | 26.220210000 | 11.416202000 | 13.265706000 |
| O  | 25.745725000 | 8.664852000  | 11.556048000 |
| O  | 24.234693000 | 9.449821000  | 9.193725000  |
| N  | 26.813637000 | 9.238988000  | 7.759053000  |
| C  | 26.090538000 | 12.528697000 | 8.606007000  |
| C  | 24.717464000 | 12.700453000 | 8.659180000  |
| C  | 23.973351000 | 13.002951000 | 7.523108000  |
| C  | 24.620343000 | 13.138232000 | 6.296445000  |
| C  | 26.002459000 | 12.974285000 | 6.238344000  |
| C  | 26.747806000 | 12.677360000 | 7.369614000  |
| C  | 30.777149000 | 11.770149000 | 7.115051000  |
| C  | 31.401904000 | 11.721460000 | 5.877585000  |
| C  | 32.724072000 | 11.305045000 | 5.741252000  |
| C  | 33.437147000 | 10.923875000 | 6.877280000  |
| C  | 32.811178000 | 10.965388000 | 8.121603000  |
| C  | 31.495812000 | 11.381319000 | 8.263059000  |
| C  | 29.581603000 | 11.159184000 | 11.927057000 |
| C  | 30.240327000 | 10.711656000 | 13.061557000 |
| C  | 29.564458000 | 10.495099000 | 14.260696000 |
| C  | 28.194472000 | 10.742337000 | 14.321914000 |
| C  | 27.533722000 | 11.199328000 | 13.186215000 |
| C  | 28.197630000 | 11.405056000 | 11.989738000 |
| C  | 24.575779000 | 8.718838000  | 12.058586000 |
| C  | 23.409339000 | 9.098583000  | 11.384328000 |
| H  | 22.495959000 | 9.092508000  | 11.969823000 |
| C  | 23.274756000 | 9.398837000  | 10.018412000 |
| C  | 25.994437000 | 9.624526000  | 6.772813000  |
| H  | 24.968387000 | 9.830424000  | 7.073254000  |
| C  | 26.440547000 | 9.766205000  | 5.467193000  |
| H  | 25.750804000 | 10.096600000 | 4.695248000  |
| C  | 27.784024000 | 9.513198000  | 5.189121000  |
| H  | 28.173536000 | 9.634105000  | 4.180012000  |
| C  | 28.630509000 | 9.119034000  | 6.219004000  |
| H  | 29.683218000 | 8.927013000  | 6.030543000  |
| C  | 28.128477000 | 8.977310000  | 7.517228000  |
| C  | 28.877520000 | 8.582537000  | 8.703571000  |
| C  | 30.246311000 | 8.275196000  | 8.716122000  |
| H  | 30.838661000 | 8.335380000  | 7.804308000  |
| C  | 30.858041000 | 7.909792000  | 9.910883000  |
| H  | 31.922485000 | 7.683803000  | 9.930304000  |
| C  | 30.098105000 | 7.838944000  | 11.086320000 |
| H  | 30.583687000 | 7.563351000  | 12.021936000 |
| C  | 28.739354000 | 8.145886000  | 11.078445000 |
| H  | 28.164143000 | 8.120589000  | 12.002407000 |
| C  | 28.103752000 | 8.529587000  | 9.891826000  |

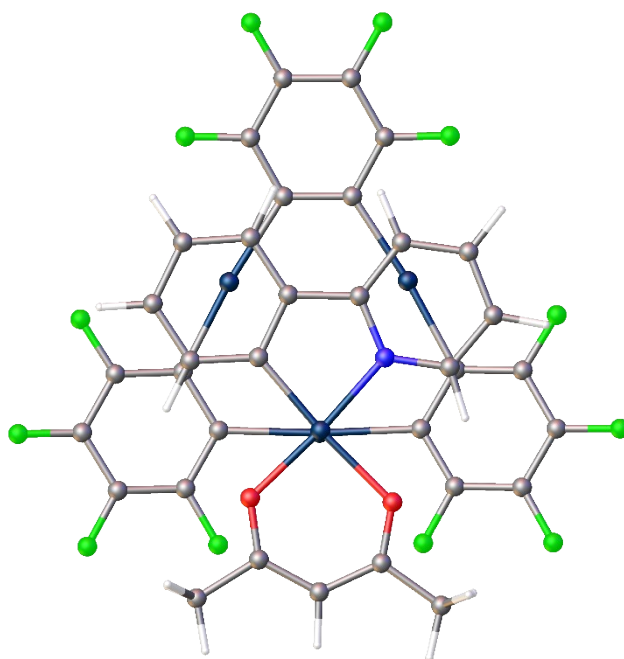

|   |              |              |              |
|---|--------------|--------------|--------------|
| C | 21.858707000 | 9.686547000  | 9.485845000  |
| H | 21.849551000 | 9.752344000  | 8.391909000  |
| H | 21.155642000 | 8.897088000  | 9.774914000  |
| H | 21.470217000 | 10.633851000 | 9.876741000  |
| C | 24.432339000 | 8.331157000  | 13.542071000 |
| H | 23.379435000 | 8.222087000  | 13.825982000 |
| H | 24.932137000 | 7.379540000  | 13.755931000 |
| H | 24.873948000 | 9.090494000  | 14.197431000 |

Cartesian coordinate for  ${}^3\text{M1}\cdot\text{Hg}_3$  (in Å)

|    |                   |                  |                   |
|----|-------------------|------------------|-------------------|
| Hg | 26.96953289623313 | 5.09213772572529 | 10.28251124881927 |
| Hg | 28.73457366489796 | 5.44523858168009 | 7.15985459821422  |
| Hg | 30.50061919677584 | 4.41748955732479 | 10.18277442568785 |
| Pt | 26.47061694228161 | 2.16144624869045 | 9.54989165685373  |
| F  | 23.97586712904589 | 5.71585684759858 | 9.69432477921691  |
| F  | 22.61535297419034 | 6.28129417258760 | 7.43892971550915  |
| F  | 23.91786899783728 | 6.53455116190217 | 5.08913534168445  |
| F  | 26.59546346456279 | 6.19880200787280 | 4.97747972626059  |
| F  | 30.82951275360745 | 5.43809732007038 | 4.85984029620083  |
| F  | 33.46291101295010 | 4.85369703355483 | 4.75846232281368  |
| F  | 34.77281261967964 | 4.10132126424803 | 6.99330866790311  |
| F  | 33.46382788438243 | 3.92707050801065 | 9.34371110982452  |
| F  | 31.34577968007969 | 3.53424448356932 | 13.08210545117330 |
| F  | 29.94183993224133 | 3.17502000966012 | 15.36078228884426 |
| F  | 27.29218907498490 | 3.67762731219930 | 15.41698863555115 |
| F  | 26.02791860512276 | 4.56434638191618 | 13.20507633083332 |
| O  | 25.93555813470315 | 1.91734969583013 | 11.46346335300539 |
| O  | 24.53547920604439 | 2.67455943277551 | 8.99535954964670  |
| N  | 27.19834779663730 | 2.32621890466563 | 7.71631982896695  |
| C  | 26.02080908338442 | 5.66709374023188 | 8.52622142741269  |
| C  | 24.64737089077687 | 5.84310430069897 | 8.55170420997000  |
| C  | 23.92322113979932 | 6.13303308087451 | 7.39841452717117  |
| C  | 24.59520545823027 | 6.25989273967061 | 6.18430999342518  |
| C  | 25.97740991316233 | 6.08538033359266 | 6.14963665503861  |
| C  | 26.69910837132545 | 5.78938099690347 | 7.29729224726939  |
| C  | 30.75785394496921 | 4.99650061443758 | 7.17299173303125  |
| C  | 31.45463920677049 | 5.07427442392416 | 5.97597347903286  |
| C  | 32.81380708983110 | 4.77601045278215 | 5.90055108752229  |
| C  | 33.49020155382720 | 4.38753327171084 | 7.05496261765968  |
| C  | 32.79379943109549 | 4.30523258805121 | 8.25988644142759  |
| C  | 31.44168217277601 | 4.60195557368845 | 8.34182986565278  |
| C  | 29.41657451971985 | 4.25877942703294 | 11.93831610870900 |
| C  | 30.04432201026458 | 3.80539342127331 | 13.08919748341565 |
| C  | 29.33784667883684 | 3.60954275141149 | 14.27434724233515 |
| C  | 27.96940506018909 | 3.87169253609340 | 14.30404825761083 |
| C  | 27.33872442393062 | 4.33251622128894 | 13.15150578790609 |
| C  | 28.03516038475545 | 4.53272119999355 | 11.97113019749540 |
| C  | 24.76994409493814 | 2.14817671360302 | 11.90905270675780 |
| C  | 23.64037962781688 | 2.56120968762942 | 11.20428552327868 |
| H  | 22.72642932524796 | 2.71451412514539 | 11.77220791470589 |
| C  | 23.59009727481828 | 2.78557644010953 | 9.82300191858682  |
| C  | 28.46159566712150 | 2.03696148597330 | 7.57913109013414  |
| C  | 29.14541107122127 | 1.66209175403616 | 8.77894402205376  |
| C  | 28.32652257238693 | 1.67085201721523 | 9.88018754819036  |
| H  | 26.66397503050633 | 2.62054923573130 | 6.90628655200408  |
| H  | 28.94208130278212 | 2.09614665171861 | 6.59960150280649  |
| H  | 30.20023536482934 | 1.39254393834864 | 8.77725127343310  |
| H  | 28.71029163451681 | 1.41515155299621 | 10.87185302877908 |
| H  | 24.66588995156155 | 2.00016229707497 | 12.99203348440376 |
| H  | 22.62392051634739 | 3.09756990187580 | 9.39913710377003  |

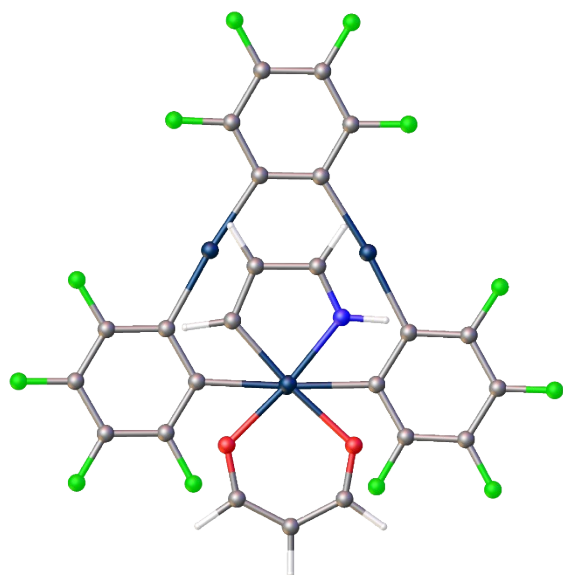

Cartesian coordinate for  ${}^3\text{M2}\cdot\text{Hg}_3$  (in Å)

|    |           |           |           |
|----|-----------|-----------|-----------|
| Hg | 0.923375  | 0.306411  | -1.687391 |
| Hg | -2.204865 | 1.919097  | -1.068926 |
| Hg | -2.095656 | -1.380081 | -2.573175 |
| H  | 2.998913  | 2.524300  | -0.809734 |
| F  | 3.067113  | 4.870521  | 0.225119  |
| F  | 0.691033  | 6.025952  | 0.742877  |
| F  | -1.596554 | 4.716158  | 0.164229  |
| F  | -5.218220 | 2.621664  | -0.659721 |
| F  | -7.510530 | 1.324537  | -1.254652 |
| F  | -7.431904 | -1.105350 | -2.421231 |
| F  | -5.065284 | -2.260398 | -3.002078 |
| F  | -1.309245 | -4.154611 | -3.758564 |
| F  | 1.053304  | -5.393914 | -4.155034 |
| F  | 3.350595  | -4.146108 | -3.504841 |
| H  | 3.132638  | -1.789587 | -2.518381 |
| C  | 0.835690  | 2.249948  | -0.936661 |
| C  | 2.010760  | 2.947017  | -0.631561 |
| C  | 1.960078  | 4.215516  | -0.068209 |
| C  | 0.735096  | 4.823410  | 0.204964  |
| C  | -0.432665 | 4.129949  | -0.101946 |
| C  | -0.406711 | 2.860438  | -0.666352 |
| C  | -3.923181 | 0.855213  | -1.528964 |
| C  | -5.153535 | 1.425301  | -1.237587 |
| C  | -6.348701 | 0.773414  | -1.535486 |
| C  | -6.308032 | -0.481968 | -2.138742 |
| C  | -5.073664 | -1.060348 | -2.430991 |
| C  | -3.881030 | -0.416245 | -2.137400 |
| C  | -0.242806 | -2.242038 | -2.891801 |
| C  | -0.187476 | -3.521258 | -3.432926 |
| C  | 1.020869  | -4.178828 | -3.645628 |
| C  | 2.203906  | -3.523425 | -3.305465 |
| C  | 2.174237  | -2.244798 | -2.765735 |
| C  | 0.957753  | -1.588120 | -2.545987 |
| Pt | 1.176564  | -0.668899 | 1.215678  |
| O  | 2.494094  | -2.027706 | 0.565590  |
| O  | 2.690783  | 0.631734  | 1.786706  |
| N  | -0.279689 | 0.524498  | 1.820999  |
| C  | 3.746642  | -1.842198 | 0.529639  |
| C  | 4.467823  | -0.722847 | 0.948477  |
| H  | 5.548355  | -0.750717 | 0.830276  |
| C  | 3.909385  | 0.409823  | 1.556991  |
| C  | -1.489217 | 0.078323  | 1.645949  |
| C  | -1.593589 | -1.209715 | 1.028179  |
| C  | -0.369945 | -1.757720 | 0.738343  |
| H  | -0.144754 | 1.450621  | 2.210738  |
| H  | -2.350829 | 0.676644  | 1.952904  |
| H  | -2.557828 | -1.678759 | 0.839002  |
| H  | -0.287785 | -2.735978 | 0.256384  |
| H  | 4.314995  | -2.684238 | 0.109896  |
| H  | 4.604404  | 1.201444  | 1.877816  |

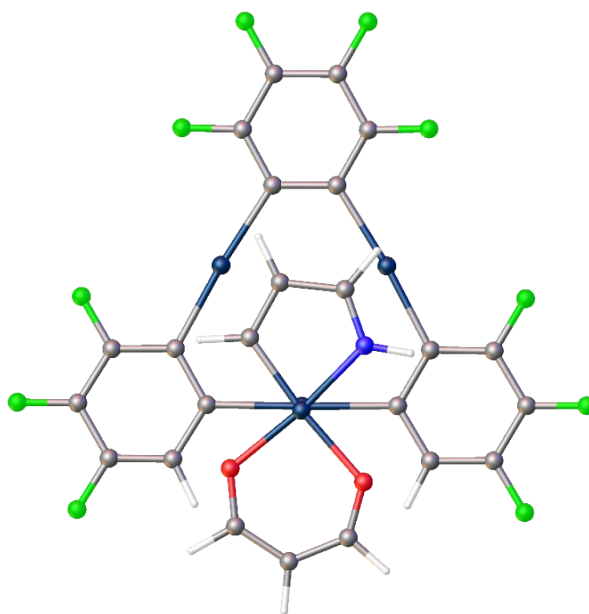

Cartesian coordinate for  $S_0$  ( $3 \cdot \text{Hg}_3$ ) (in Å)

|    |              |              |              |
|----|--------------|--------------|--------------|
| Hg | 27.069712000 | 11.917767000 | 10.331552000 |
| Hg | 28.772044000 | 12.292089000 | 7.171645000  |
| Hg | 30.620246000 | 11.267250000 | 10.142094000 |
| Pt | 26.214333000 | 9.006452000  | 9.645968000  |
| F  | 24.071128000 | 12.556910000 | 9.814289000  |
| F  | 22.663042000 | 13.148767000 | 7.588063000  |
| F  | 23.919783000 | 13.405676000 | 5.212935000  |
| F  | 26.596423000 | 13.085555000 | 5.052473000  |
| F  | 30.732399000 | 12.062427000 | 4.777569000  |
| F  | 33.305997000 | 11.262104000 | 4.560359000  |
| F  | 34.686360000 | 10.525606000 | 6.757928000  |
| F  | 33.507429000 | 10.575674000 | 9.185618000  |
| F  | 31.543757000 | 10.447928000 | 13.020014000 |
| F  | 30.197314000 | 10.054314000 | 15.328950000 |
| F  | 27.538681000 | 10.524362000 | 15.445822000 |
| F  | 26.220210000 | 11.416202000 | 13.265706000 |
| O  | 25.745725000 | 8.664852000  | 11.556048000 |
| O  | 24.234693000 | 9.449821000  | 9.193725000  |
| N  | 26.813637000 | 9.238988000  | 7.759053000  |
| C  | 26.090538000 | 12.528697000 | 8.606007000  |
| C  | 24.717464000 | 12.700453000 | 8.659180000  |
| C  | 23.973351000 | 13.002951000 | 7.523108000  |
| C  | 24.620343000 | 13.138232000 | 6.296445000  |
| C  | 26.002459000 | 12.974285000 | 6.238344000  |
| C  | 26.747806000 | 12.677360000 | 7.369614000  |
| C  | 30.777149000 | 11.770149000 | 7.115051000  |
| C  | 31.401904000 | 11.721460000 | 5.877585000  |
| C  | 32.724072000 | 11.305045000 | 5.741252000  |
| C  | 33.437147000 | 10.923875000 | 6.877280000  |
| C  | 32.811178000 | 10.965388000 | 8.121603000  |
| C  | 31.495812000 | 11.381319000 | 8.263059000  |
| C  | 29.581603000 | 11.159184000 | 11.927057000 |
| C  | 30.240327000 | 10.711656000 | 13.061557000 |
| C  | 29.564458000 | 10.495099000 | 14.260696000 |
| C  | 28.194472000 | 10.742337000 | 14.321914000 |
| C  | 27.533722000 | 11.199328000 | 13.186215000 |
| C  | 28.197630000 | 11.405056000 | 11.989738000 |
| C  | 24.575779000 | 8.718838000  | 12.058586000 |
| C  | 23.409339000 | 9.098583000  | 11.384328000 |
| H  | 22.495959000 | 9.092508000  | 11.969823000 |
| C  | 23.274756000 | 9.398837000  | 10.018412000 |
| C  | 24.469628000 | 8.258111000  | 13.518992000 |
| C  | 23.889587000 | 9.382359000  | 14.388020000 |
| H  | 22.895554000 | 9.695531000  | 14.049443000 |
| H  | 24.547752000 | 10.255995000 | 14.380661000 |
| H  | 23.795933000 | 9.033414000  | 15.424191000 |
| C  | 25.844186000 | 7.862231000  | 14.057255000 |
| H  | 26.299789000 | 7.073300000  | 13.449619000 |
| H  | 25.740252000 | 7.492550000  | 15.084397000 |
| H  | 26.529450000 | 8.712509000  | 14.077322000 |
| C  | 23.547196000 | 7.028878000  | 13.567977000 |
| H  | 23.926484000 | 6.225019000  | 12.925225000 |
| H  | 22.527039000 | 7.265560000  | 13.246253000 |
| H  | 23.496751000 | 6.646876000  | 14.595448000 |
| C  | 21.870641000 | 9.637146000  | 9.446165000  |
| C  | 21.948653000 | 9.871737000  | 7.937573000  |
| H  | 22.421605000 | 9.026181000  | 7.426119000  |
| H  | 22.514193000 | 10.776772000 | 7.703842000  |

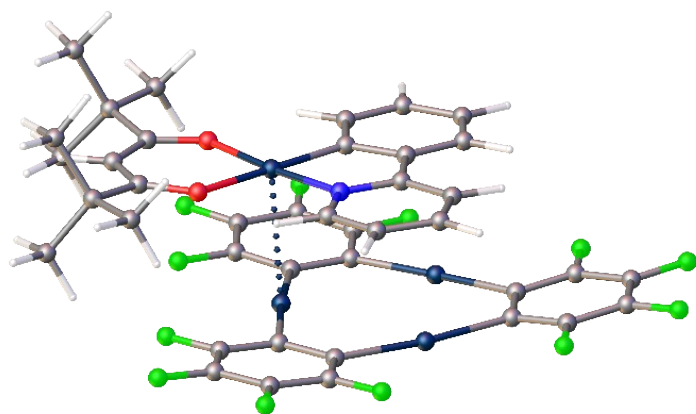

|   |              |              |              |
|---|--------------|--------------|--------------|
| H | 20.936725000 | 9.997214000  | 7.534009000  |
| C | 21.011207000 | 8.391478000  | 9.711732000  |
| H | 21.465112000 | 7.495726000  | 9.270273000  |
| H | 20.018492000 | 8.525170000  | 9.263498000  |
| H | 20.872920000 | 8.205728000  | 10.782408000 |
| C | 21.239121000 | 10.864268000 | 10.118633000 |
| H | 21.834446000 | 11.761411000 | 9.925106000  |
| H | 21.152680000 | 10.738006000 | 11.203797000 |
| H | 20.230722000 | 11.027466000 | 9.717535000  |
| C | 25.994437000 | 9.624526000  | 6.772813000  |
| H | 24.968387000 | 9.830424000  | 7.073254000  |
| C | 26.440547000 | 9.766205000  | 5.467193000  |
| H | 25.750804000 | 10.096600000 | 4.695248000  |
| C | 27.784024000 | 9.513198000  | 5.189121000  |
| H | 28.173536000 | 9.634105000  | 4.180012000  |
| C | 28.630509000 | 9.119034000  | 6.219004000  |
| H | 29.683218000 | 8.927013000  | 6.030543000  |
| C | 28.128477000 | 8.977310000  | 7.517228000  |
| C | 28.877520000 | 8.582537000  | 8.703571000  |
| C | 30.246311000 | 8.275196000  | 8.716122000  |
| H | 30.838661000 | 8.335380000  | 7.804308000  |
| C | 30.858041000 | 7.909792000  | 9.910883000  |
| H | 31.922485000 | 7.683803000  | 9.930304000  |
| C | 30.098105000 | 7.838944000  | 11.086320000 |
| H | 30.583687000 | 7.563351000  | 12.021936000 |
| C | 28.739354000 | 8.145886000  | 11.078445000 |
| H | 28.164143000 | 8.120589000  | 12.002407000 |
| C | 28.103752000 | 8.529587000  | 9.891826000  |

Cartesian coordinate for  $T_1$  ( $3 \cdot \text{Hg}_3$ ) (in Å)

|    |              |              |              |
|----|--------------|--------------|--------------|
| Hg | 27.138294000 | 11.909366000 | 10.255866000 |
| Hg | 28.760638000 | 12.347209000 | 7.059654000  |
| Hg | 30.688469000 | 11.293061000 | 9.951952000  |
| Pt | 26.199836000 | 8.934705000  | 9.734928000  |
| F  | 24.113805000 | 12.502545000 | 9.819331000  |
| F  | 22.650081000 | 13.110875000 | 7.632717000  |
| F  | 23.849441000 | 13.415294000 | 5.235094000  |
| F  | 26.525473000 | 13.123904000 | 5.009168000  |
| F  | 30.702334000 | 12.306471000 | 4.626356000  |
| F  | 33.301699000 | 11.620817000 | 4.347805000  |
| F  | 34.734593000 | 10.833360000 | 6.492924000  |
| F  | 33.582002000 | 10.724510000 | 8.933415000  |
| F  | 31.669776000 | 10.292093000 | 12.754097000 |
| F  | 30.381226000 | 9.786719000  | 15.069714000 |
| F  | 27.732801000 | 10.290525000 | 15.289331000 |
| F  | 26.365225000 | 11.295419000 | 13.190567000 |
| O  | 25.665851000 | 8.588844000  | 11.643385000 |
| O  | 24.240367000 | 9.383637000  | 9.229674000  |
| N  | 26.837380000 | 9.205993000  | 7.878207000  |
| C  | 26.106778000 | 12.518144000 | 8.564723000  |
| C  | 24.732728000 | 12.669868000 | 8.651321000  |
| C  | 23.960664000 | 12.979136000 | 7.536307000  |
| C  | 24.577813000 | 13.138417000 | 6.297441000  |
| C  | 25.959548000 | 12.989188000 | 6.205402000  |
| C  | 26.734271000 | 12.687422000 | 7.315635000  |
| C  | 30.783135000 | 11.905459000 | 6.945997000  |
| C  | 31.394898000 | 11.939405000 | 5.701830000  |
| C  | 32.731434000 | 11.583332000 | 5.534237000  |
| C  | 33.472054000 | 11.176197000 | 6.643135000  |
| C  | 32.859168000 | 11.133507000 | 7.893911000  |
| C  | 31.530678000 | 11.492586000 | 8.066654000  |
| C  | 29.690419000 | 11.087076000 | 11.752637000 |
| C  | 30.371623000 | 10.569797000 | 12.843256000 |
| C  | 29.724958000 | 10.295590000 | 14.046543000 |
| C  | 28.360632000 | 10.555041000 | 14.158977000 |
| C  | 27.674224000 | 11.073276000 | 13.065972000 |
| C  | 28.309593000 | 11.336940000 | 11.864518000 |
| C  | 24.490590000 | 8.686145000  | 12.117263000 |
| C  | 23.348767000 | 9.079856000  | 11.404029000 |
| H  | 22.420885000 | 9.108140000  | 11.965233000 |
| C  | 23.256503000 | 9.357317000  | 10.032393000 |
| C  | 24.342616000 | 8.288629000  | 13.591389000 |
| C  | 23.869112000 | 9.503774000  | 14.402447000 |
| H  | 22.910084000 | 9.891080000  | 14.040066000 |
| H  | 24.606988000 | 10.310142000 | 14.355983000 |
| H  | 23.741133000 | 9.216200000  | 15.453673000 |
| C  | 25.678321000 | 7.796821000  | 14.148584000 |
| H  | 26.057451000 | 6.941594000  | 13.578459000 |
| H  | 25.544015000 | 7.483606000  | 15.190852000 |
| H  | 26.438981000 | 8.580758000  | 14.132756000 |
| C  | 23.313420000 | 7.152416000  | 13.698491000 |
| H  | 23.611073000 | 6.289665000  | 13.090098000 |
| H  | 22.314406000 | 7.464819000  | 13.375549000 |
| H  | 23.239418000 | 6.822133000  | 14.742170000 |
| C  | 21.872405000 | 9.604309000  | 9.418819000  |
| C  | 21.993164000 | 9.831802000  | 7.912017000  |
| H  | 22.492220000 | 8.991539000  | 7.417590000  |
| H  | 22.550888000 | 10.745159000 | 7.693380000  |
| H  | 20.991889000 | 9.942728000  | 7.478823000  |
| C  | 20.997489000 | 8.365621000  | 9.667877000  |

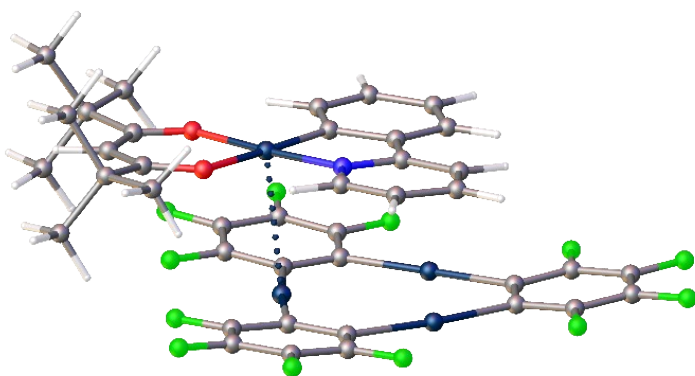

|   |              |              |              |
|---|--------------|--------------|--------------|
| H | 21.454639000 | 7.465550000  | 9.238735000  |
| H | 20.016846000 | 8.505923000  | 9.195952000  |
| H | 20.833211000 | 8.183633000  | 10.735571000 |
| C | 21.232111000 | 10.840374000 | 10.066646000 |
| H | 21.844447000 | 11.729933000 | 9.891756000  |
| H | 21.102948000 | 10.718543000 | 11.148028000 |
| H | 20.241646000 | 11.014201000 | 9.627384000  |
| C | 26.068597000 | 9.570354000  | 6.850386000  |
| H | 25.018257000 | 9.733959000  | 7.086984000  |
| C | 26.574040000 | 9.751740000  | 5.571803000  |
| H | 25.906947000 | 10.065028000 | 4.773859000  |
| C | 27.967410000 | 9.567637000  | 5.343996000  |
| H | 28.391404000 | 9.722664000  | 4.354427000  |
| C | 28.769262000 | 9.191395000  | 6.394179000  |
| H | 29.837696000 | 9.046889000  | 6.252888000  |
| C | 28.217937000 | 8.998627000  | 7.691746000  |
| C | 28.889588000 | 8.580873000  | 8.853611000  |
| C | 30.278784000 | 8.282868000  | 8.969796000  |
| H | 30.940455000 | 8.388182000  | 8.112450000  |
| C | 30.777397000 | 7.841085000  | 10.174720000 |
| H | 31.839267000 | 7.610081000  | 10.254221000 |
| C | 29.947018000 | 7.682811000  | 11.329892000 |
| H | 30.391542000 | 7.347232000  | 12.264288000 |
| C | 28.601484000 | 7.990120000  | 11.254841000 |
| H | 27.961569000 | 7.912344000  | 12.131664000 |
| C | 28.032069000 | 8.445471000  | 10.052257000 |



Cartesian coordinate for  $S_0$  (**3**) (in Å)

|    |              |              |              |
|----|--------------|--------------|--------------|
| Pt | 0.011726000  | -0.016947000 | -0.165698000 |
| O  | -1.979055000 | -0.190466000 | -0.216169000 |
| O  | -0.140275000 | 2.053811000  | -0.404293000 |
| N  | 1.998310000  | 0.005917000  | -0.095887000 |
| C  | -2.815268000 | 0.757452000  | -0.345916000 |
| C  | -2.506210000 | 2.116927000  | -0.483814000 |
| H  | -3.347955000 | 2.794654000  | -0.584508000 |
| C  | -1.224996000 | 2.694093000  | -0.510208000 |
| C  | -4.289775000 | 0.328652000  | -0.346911000 |
| C  | -5.013119000 | 1.010440000  | 0.823466000  |
| H  | -5.002855000 | 2.102454000  | 0.733594000  |
| H  | -4.547243000 | 0.746204000  | 1.780531000  |
| H  | -6.060841000 | 0.684777000  | 0.854248000  |
| C  | -4.398351000 | -1.187860000 | -0.189151000 |
| H  | -3.889402000 | -1.710736000 | -1.005923000 |
| H  | -5.454878000 | -1.482755000 | -0.193212000 |
| H  | -3.948630000 | -1.523713000 | 0.751310000  |
| C  | -4.936040000 | 0.744592000  | -1.676175000 |
| H  | -4.415050000 | 0.287967000  | -2.526400000 |
| H  | -4.924088000 | 1.831072000  | -1.817789000 |
| H  | -5.982141000 | 0.413311000  | -1.701261000 |
| C  | -1.103582000 | 4.215812000  | -0.682027000 |
| C  | 0.368464000  | 4.626535000  | -0.679870000 |
| H  | 0.916628000  | 4.143299000  | -1.496131000 |
| H  | 0.856247000  | 4.351907000  | 0.261996000  |
| H  | 0.449427000  | 5.713190000  | -0.805736000 |
| C  | -1.739555000 | 4.625005000  | -2.018241000 |
| H  | -1.253558000 | 4.114063000  | -2.858336000 |
| H  | -1.629911000 | 5.706764000  | -2.168992000 |
| H  | -2.808500000 | 4.387212000  | -2.053931000 |
| C  | -1.825056000 | 4.916327000  | 0.478029000  |
| H  | -1.402171000 | 4.614951000  | 1.444130000  |
| H  | -2.896225000 | 4.686604000  | 0.494154000  |
| H  | -1.715808000 | 6.004482000  | 0.383686000  |
| C  | 2.721958000  | 1.128921000  | -0.192652000 |
| H  | 2.144473000  | 2.043493000  | -0.315108000 |
| C  | 4.107026000  | 1.114952000  | -0.139022000 |
| H  | 4.659108000  | 2.047690000  | -0.221226000 |
| C  | 4.755801000  | -0.110862000 | 0.020807000  |
| H  | 5.842424000  | -0.159702000 | 0.067333000  |
| C  | 4.000639000  | -1.270727000 | 0.120444000  |
| H  | 4.481729000  | -2.237195000 | 0.245676000  |
| C  | 2.604799000  | -1.204015000 | 0.060517000  |
| C  | 1.673120000  | -2.318664000 | 0.149007000  |
| C  | 2.047773000  | -3.659196000 | 0.309664000  |
| H  | 3.098934000  | -3.938520000 | 0.378412000  |
| C  | 1.070315000  | -4.643905000 | 0.382046000  |
| H  | 1.353844000  | -5.687523000 | 0.506745000  |
| C  | -0.279738000 | -4.284828000 | 0.293507000  |
| H  | -1.045859000 | -5.058172000 | 0.350227000  |
| C  | -0.656547000 | -2.952756000 | 0.133770000  |
| H  | -1.709431000 | -2.684620000 | 0.065843000  |
| C  | 0.309059000  | -1.941547000 | 0.058021000  |

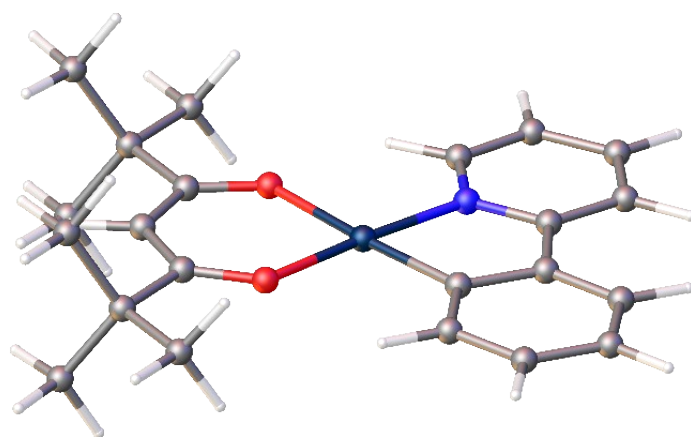

Cartesian coordinate for **T<sub>1</sub> (3)** (in Å)

|    |              |              |              |
|----|--------------|--------------|--------------|
| Pt | 0.018848000  | -0.027673000 | -0.164005000 |
| O  | -1.990896000 | -0.200758000 | -0.212988000 |
| O  | -0.141957000 | 2.039714000  | -0.403202000 |
| N  | 1.993186000  | 0.032557000  | -0.101781000 |
| C  | -2.823324000 | 0.746739000  | -0.344764000 |
| C  | -2.509660000 | 2.107495000  | -0.484647000 |
| H  | -3.349195000 | 2.787411000  | -0.586835000 |
| C  | -1.229169000 | 2.680961000  | -0.509836000 |
| C  | -4.299207000 | 0.324744000  | -0.346943000 |
| C  | -5.020667000 | 1.013454000  | 0.820661000  |
| H  | -5.005404000 | 2.105140000  | 0.728428000  |
| H  | -4.558350000 | 0.749249000  | 1.779455000  |
| H  | -6.069865000 | 0.692788000  | 0.849965000  |
| C  | -4.415297000 | -1.190720000 | -0.185549000 |
| H  | -3.908893000 | -1.718313000 | -1.000946000 |
| H  | -5.473121000 | -1.480439000 | -0.189955000 |
| H  | -3.968951000 | -1.526365000 | 0.756665000  |
| C  | -4.940191000 | 0.741099000  | -1.678814000 |
| H  | -4.420062000 | 0.279964000  | -2.527114000 |
| H  | -4.923077000 | 1.827108000  | -1.822907000 |
| H  | -5.987656000 | 0.414584000  | -1.704841000 |
| C  | -1.103151000 | 4.201738000  | -0.680318000 |
| C  | 0.370099000  | 4.608335000  | -0.682344000 |
| H  | 0.915034000  | 4.124735000  | -1.500424000 |
| H  | 0.860608000  | 4.331439000  | 0.257279000  |
| H  | 0.452821000  | 5.694844000  | -0.807369000 |
| C  | -1.743048000 | 4.614800000  | -2.013615000 |
| H  | -1.262751000 | 4.103089000  | -2.856463000 |
| H  | -1.628072000 | 5.696072000  | -2.162888000 |
| H  | -2.813492000 | 4.383233000  | -2.045479000 |
| C  | -1.819215000 | 4.901350000  | 0.483956000  |
| H  | -1.393028000 | 4.597862000  | 1.447902000  |
| H  | -2.890957000 | 4.674438000  | 0.503684000  |
| H  | -1.707199000 | 5.989193000  | 0.390670000  |
| C  | 2.730888000  | 1.141960000  | -0.199764000 |
| H  | 2.168283000  | 2.065891000  | -0.322930000 |
| C  | 4.114827000  | 1.123789000  | -0.148534000 |
| H  | 4.664015000  | 2.057539000  | -0.233611000 |
| C  | 4.786619000  | -0.123041000 | 0.015252000  |
| H  | 5.872909000  | -0.161955000 | 0.058642000  |
| C  | 4.042116000  | -1.268373000 | 0.117085000  |
| H  | 4.525146000  | -2.234890000 | 0.242989000  |
| C  | 2.621434000  | -1.218544000 | 0.060765000  |
| C  | 1.725347000  | -2.291538000 | 0.149376000  |
| C  | 2.064362000  | -3.667006000 | 0.315222000  |
| H  | 3.106330000  | -3.973422000 | 0.386216000  |
| C  | 1.066886000  | -4.606083000 | 0.384891000  |
| H  | 1.333082000  | -5.655373000 | 0.511541000  |
| C  | -0.319387000 | -4.251443000 | 0.296127000  |
| H  | -1.076224000 | -5.030916000 | 0.356311000  |
| C  | -0.679720000 | -2.924350000 | 0.135216000  |
| H  | -1.727223000 | -2.637045000 | 0.065969000  |
| C  | 0.295258000  | -1.916250000 | 0.057177000  |

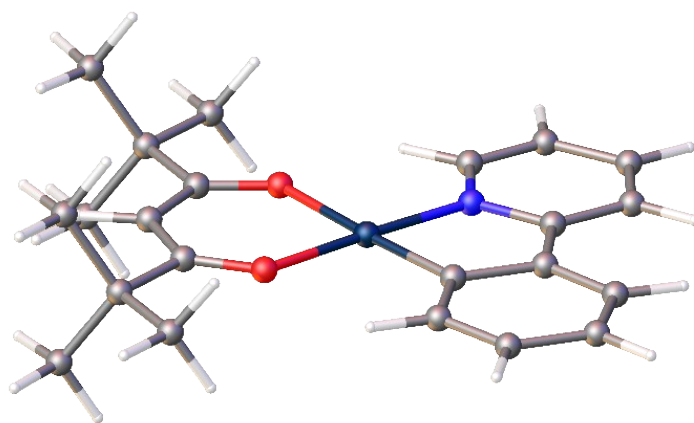

Cartesian coordinate for **Hg<sub>3</sub>** (in Å)

|    |                   |                  |                   |
|----|-------------------|------------------|-------------------|
| Hg | 4.44247609856471  | 2.91426727021404 | 17.39861939847381 |
| Hg | 7.39913335512269  | 3.11001514712106 | 15.31629987332506 |
| Hg | 4.27717073154918  | 1.91813488510874 | 13.92046532054159 |
| F  | 5.29390178351241  | 3.87534395491264 | 20.25520163658952 |
| F  | 7.62158786048194  | 4.74536078129470 | 21.28273373006563 |
| F  | 9.82312518306212  | 4.90408885731571 | 19.72555804719984 |
| F  | 9.70627423654452  | 4.19285271254225 | 17.13585109647597 |
| F  | 9.50484062171279  | 3.02616343719421 | 13.00095777457367 |
| F  | 9.37605347068481  | 2.25961161681278 | 10.42705572938257 |
| F  | 7.05325571676778  | 1.34654635678709 | 9.39263625103142  |
| F  | 4.84946860183512  | 1.20349444932940 | 10.92667189683506 |
| F  | 1.32088829399984  | 1.03926419355350 | 13.37938478742123 |
| F  | -0.87339173274703 | 0.92330327041966 | 14.92748409371766 |
| F  | -0.75056288174247 | 1.66711491992267 | 17.52281589679065 |
| F  | 1.56579368797209  | 2.53111145792558 | 18.57647570807645 |
| C  | 6.26919414651740  | 3.57012585499521 | 18.12800970071825 |
| C  | 6.36558224906317  | 3.94189532434910 | 19.45350597629465 |
| C  | 7.55279136612717  | 4.39296663568315 | 20.00759772599866 |
| C  | 8.68119828883817  | 4.47426090740178 | 19.20948747379725 |
| C  | 8.59400477799582  | 4.10200633523835 | 17.87769927666344 |
| C  | 7.41582700357720  | 3.65191051234203 | 17.31734180091778 |
| C  | 7.22506547348928  | 2.51842282318144 | 13.33700334255787 |
| C  | 8.33605696759774  | 2.58010863907100 | 12.52089231853994 |
| C  | 8.29642259292433  | 2.19100114684439 | 11.19171619886956 |
| C  | 7.10582340286226  | 1.72371998177768 | 10.66139113031275 |
| C  | 5.98481414000781  | 1.65976352616275 | 11.47324048351516 |
| C  | 6.01497207391740  | 2.04634720078176 | 12.79760603251202 |
| C  | 2.62484690505617  | 1.85259058486335 | 15.17066243154541 |
| C  | 1.41884603027019  | 1.41583849081078 | 14.66174575847289 |
| C  | 0.27323991582608  | 1.34697058364031 | 15.43808679366777 |
| C  | 0.33601282984399  | 1.72825640189548 | 16.76754231344680 |
| C  | 1.54267432549481  | 2.16919690749786 | 17.28660096720411 |
| C  | 2.68871248327042  | 2.24034483300951 | 16.52125903446525 |

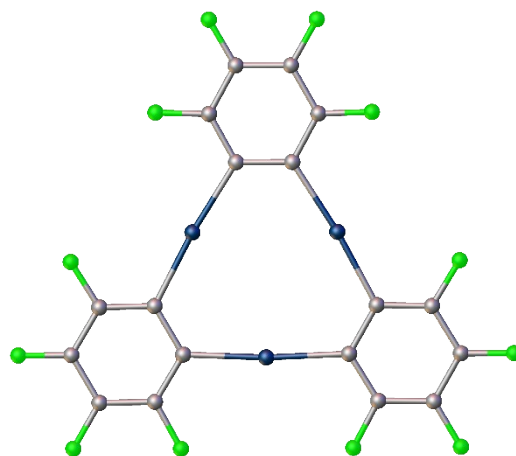

Cartesian coordinate for MC ( $3 \cdot \text{Hg}_3$ ) (in Å)

|    |              |              |              |
|----|--------------|--------------|--------------|
| Hg | 26.486175000 | 12.110328000 | 10.018046000 |
| Hg | 28.876101000 | 11.662039000 | 7.340859000  |
| Hg | 29.864577000 | 11.124716000 | 10.766553000 |
| Pt | 26.591471000 | 9.115079000  | 9.638612000  |
| F  | 23.784506000 | 12.945685000 | 8.670407000  |
| F  | 22.935997000 | 12.879323000 | 6.124077000  |
| F  | 24.676812000 | 12.367341000 | 4.117031000  |
| F  | 27.281051000 | 11.942716000 | 4.661202000  |
| F  | 31.338207000 | 10.944149000 | 5.564262000  |
| F  | 33.862604000 | 10.168150000 | 6.150208000  |
| F  | 34.640697000 | 9.915886000  | 8.720476000  |
| F  | 32.903637000 | 10.421433000 | 10.724416000 |
| F  | 29.835549000 | 9.959489000  | 13.665634000 |
| F  | 27.841193000 | 9.478113000  | 15.419329000 |
| F  | 25.336383000 | 10.328461000 | 14.902628000 |
| F  | 24.802148000 | 11.659628000 | 12.615090000 |
| O  | 26.151119000 | 7.616045000  | 11.051067000 |
| O  | 24.579117000 | 9.775855000  | 9.783301000  |
| N  | 26.513415000 | 8.663873000  | 7.517593000  |
| C  | 25.993664000 | 12.427611000 | 8.024426000  |
| C  | 24.670325000 | 12.692654000 | 7.709936000  |
| C  | 24.209415000 | 12.677011000 | 6.395722000  |
| C  | 25.106943000 | 12.418557000 | 5.363162000  |
| C  | 26.445734000 | 12.188163000 | 5.668921000  |
| C  | 26.903222000 | 12.175601000 | 6.977080000  |
| C  | 30.810226000 | 11.144769000 | 7.852362000  |
| C  | 31.712017000 | 10.853419000 | 6.840557000  |
| C  | 33.012870000 | 10.444530000 | 7.119344000  |
| C  | 33.414900000 | 10.315290000 | 8.447663000  |
| C  | 32.506610000 | 10.593014000 | 9.466398000  |
| C  | 31.212350000 | 11.008014000 | 9.194116000  |
| C  | 28.364991000 | 11.080833000 | 12.205394000 |
| C  | 28.615138000 | 10.416328000 | 13.394965000 |
| C  | 27.600717000 | 10.159944000 | 14.315914000 |
| C  | 26.306640000 | 10.595139000 | 14.047305000 |
| C  | 26.051073000 | 11.272428000 | 12.858462000 |
| C  | 27.051171000 | 11.512931000 | 11.928186000 |
| C  | 25.151464000 | 7.668595000  | 11.834224000 |
| C  | 23.993808000 | 8.436954000  | 11.651949000 |
| H  | 23.195907000 | 8.268498000  | 12.361709000 |
| C  | 23.719819000 | 9.334854000  | 10.604699000 |
| C  | 25.250525000 | 6.688467000  | 13.014999000 |
| C  | 24.291338000 | 7.031484000  | 14.155661000 |
| H  | 23.240196000 | 6.895630000  | 13.875360000 |
| H  | 24.433073000 | 8.062415000  | 14.499357000 |
| H  | 24.486920000 | 6.363549000  | 15.003458000 |
| C  | 26.686394000 | 6.691662000  | 13.553649000 |
| H  | 27.407360000 | 6.507015000  | 12.751986000 |
| H  | 26.794625000 | 5.904431000  | 14.309548000 |
| H  | 26.936968000 | 7.643632000  | 14.033056000 |
| C  | 24.922041000 | 5.298038000  | 12.447687000 |
| H  | 25.622014000 | 5.032022000  | 11.647669000 |
| H  | 23.903580000 | 5.266938000  | 12.040991000 |
| H  | 24.997004000 | 4.542776000  | 13.240224000 |
| C  | 22.293602000 | 9.870884000  | 10.409223000 |
| C  | 22.030218000 | 10.023069000 | 8.905583000  |
| H  | 22.127505000 | 9.061197000  | 8.385448000  |
| H  | 22.719569000 | 10.739528000 | 8.453421000  |
| H  | 21.008781000 | 10.388888000 | 8.746198000  |
| C  | 21.233054000 | 8.943293000  | 11.008560000 |

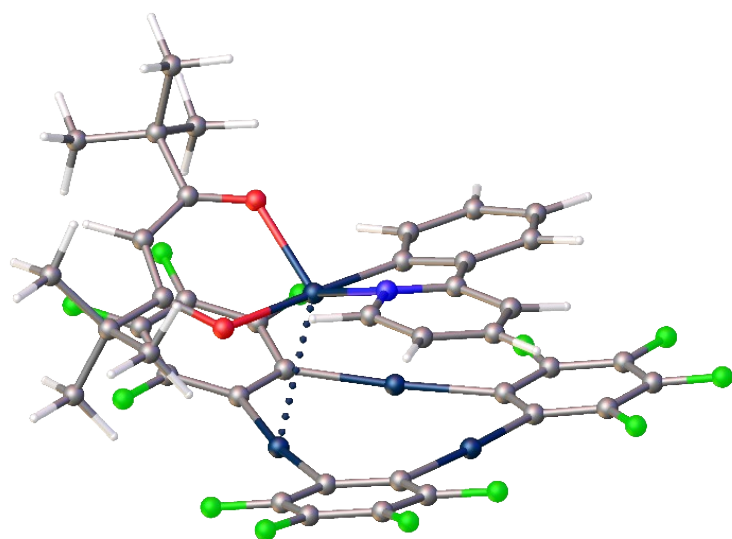

|   |              |              |              |
|---|--------------|--------------|--------------|
| H | 21.328130000 | 7.918162000  | 10.630246000 |
| H | 20.235974000 | 9.312607000  | 10.739538000 |
| H | 21.278057000 | 8.911839000  | 12.103195000 |
| C | 22.201384000 | 11.248165000 | 11.083442000 |
| H | 22.899941000 | 11.953055000 | 10.624804000 |
| H | 22.425069000 | 11.184303000 | 12.153347000 |
| H | 21.185869000 | 11.646826000 | 10.963815000 |
| C | 25.474966000 | 8.969101000  | 6.737156000  |
| H | 24.522368000 | 9.112578000  | 7.245684000  |
| C | 25.614182000 | 9.120806000  | 5.364176000  |
| H | 24.752444000 | 9.380062000  | 4.753812000  |
| C | 26.881555000 | 8.956558000  | 4.803421000  |
| H | 27.033919000 | 9.094999000  | 3.735231000  |
| C | 27.959673000 | 8.658494000  | 5.628989000  |
| H | 28.962464000 | 8.568123000  | 5.218315000  |
| C | 27.758932000 | 8.508349000  | 7.006062000  |
| C | 28.807979000 | 8.247279000  | 7.998047000  |
| C | 30.084935000 | 7.776808000  | 7.661627000  |
| H | 30.353481000 | 7.606310000  | 6.619766000  |
| C | 31.012613000 | 7.499951000  | 8.659156000  |
| H | 32.004819000 | 7.138943000  | 8.395144000  |
| C | 30.655729000 | 7.660504000  | 10.000941000 |
| H | 31.372762000 | 7.422301000  | 10.785758000 |
| C | 29.391326000 | 8.142184000  | 10.341819000 |
| H | 29.122353000 | 8.251112000  | 11.392646000 |
| C | 28.460017000 | 8.484880000  | 9.350464000  |

Cartesian coordinate for <sup>3</sup>MC (3) (in Å)

|    |              |              |              |
|----|--------------|--------------|--------------|
| Pt | -0.175653000 | -0.264334000 | -0.385832000 |
| O  | -2.113858000 | -0.315035000 | 0.531546000  |
| O  | -0.444063000 | 1.816556000  | -0.604214000 |
| N  | 1.614670000  | -0.182801000 | 0.853722000  |
| C  | -2.864257000 | 0.682680000  | 0.731571000  |
| C  | -2.571843000 | 2.021527000  | 0.426800000  |
| H  | -3.332530000 | 2.750861000  | 0.686261000  |
| C  | -1.421307000 | 2.513951000  | -0.212017000 |
| C  | -4.229950000 | 0.357093000  | 1.366472000  |
| C  | -4.344181000 | 1.088412000  | 2.711204000  |
| H  | -4.305199000 | 2.177237000  | 2.593859000  |
| H  | -3.534779000 | 0.792349000  | 3.389610000  |
| H  | -5.298132000 | 0.835369000  | 3.191749000  |
| C  | -4.350666000 | -1.148722000 | 1.599749000  |
| H  | -4.269418000 | -1.705089000 | 0.660142000  |
| H  | -5.322530000 | -1.373637000 | 2.056240000  |
| H  | -3.559406000 | -1.514296000 | 2.262241000  |
| C  | -5.349094000 | 0.815271000  | 0.421475000  |
| H  | -5.262832000 | 0.325664000  | -0.556198000 |
| H  | -5.333767000 | 1.898632000  | 0.257946000  |
| H  | -6.326287000 | 0.552334000  | 0.846802000  |
| C  | -1.323465000 | 4.024649000  | -0.485142000 |
| C  | 0.021678000  | 4.350819000  | -1.133105000 |
| H  | 0.155233000  | 3.803097000  | -2.071338000 |
| H  | 0.857043000  | 4.082205000  | -0.476870000 |
| H  | 0.080247000  | 5.426060000  | -1.342392000 |
| C  | -2.455770000 | 4.431831000  | -1.439143000 |
| H  | -2.393471000 | 3.875160000  | -2.382070000 |
| H  | -2.383053000 | 5.502224000  | -1.671575000 |
| H  | -3.444296000 | 4.247004000  | -1.003939000 |
| C  | -1.449482000 | 4.795933000  | 0.835658000  |
| H  | -0.670998000 | 4.492115000  | 1.546613000  |
| H  | -2.421293000 | 4.637789000  | 1.316093000  |
| H  | -1.337425000 | 5.872208000  | 0.651359000  |
| C  | 2.219986000  | 0.939107000  | 1.242294000  |
| H  | 1.653526000  | 1.858935000  | 1.097216000  |
| C  | 3.494356000  | 0.930474000  | 1.791045000  |
| H  | 3.962346000  | 1.860176000  | 2.105500000  |
| C  | 4.141123000  | -0.300497000 | 1.926010000  |
| H  | 5.144303000  | -0.352189000 | 2.346233000  |
| C  | 3.502698000  | -1.460682000 | 1.508793000  |
| H  | 4.002565000  | -2.422452000 | 1.587618000  |
| C  | 2.212950000  | -1.389533000 | 0.964040000  |
| C  | 1.436016000  | -2.523664000 | 0.454981000  |
| C  | 1.820218000  | -3.856968000 | 0.660204000  |
| H  | 2.717560000  | -4.093500000 | 1.231114000  |
| C  | 1.044756000  | -4.892889000 | 0.155182000  |
| H  | 1.341469000  | -5.927417000 | 0.319318000  |
| C  | -0.122680000 | -4.596757000 | -0.554828000 |
| H  | -0.734774000 | -5.406802000 | -0.951122000 |
| C  | -0.509614000 | -3.273528000 | -0.758558000 |
| H  | -1.425324000 | -3.063192000 | -1.309929000 |
| C  | 0.258210000  | -2.208379000 | -0.269670000 |

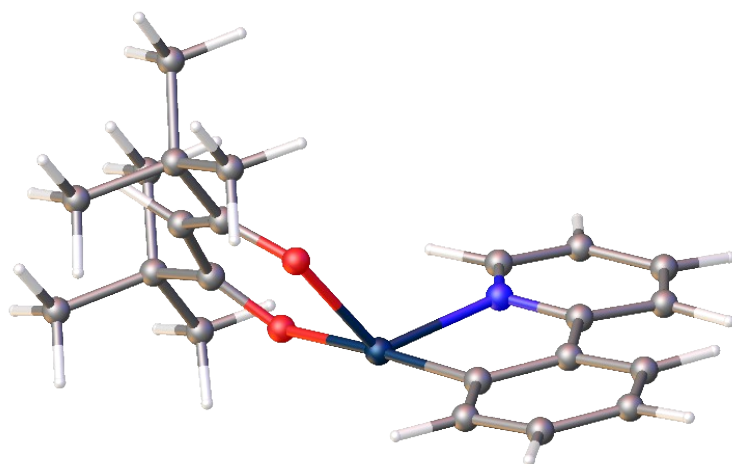

Cartesian coordinate for **MECP (3)** (in Å)

|    |              |              |              |
|----|--------------|--------------|--------------|
| Pt | -0.140703000 | -0.252676000 | -1.034764000 |
| O  | -1.895178000 | -0.298704000 | 0.178322000  |
| O  | -0.584147000 | 1.788148000  | -1.371453000 |
| N  | 0.816360000  | -0.257081000 | 0.932108000  |
| C  | -2.463609000 | 0.717511000  | 0.670446000  |
| C  | -2.239212000 | 2.053763000  | 0.304221000  |
| H  | -2.830481000 | 2.803423000  | 0.820074000  |
| C  | -1.375659000 | 2.511748000  | -0.709357000 |
| C  | -3.478831000 | 0.418280000  | 1.788098000  |
| C  | -2.935873000 | 1.019950000  | 3.093121000  |
| H  | -2.840965000 | 2.110256000  | 3.031915000  |
| H  | -1.948309000 | 0.606268000  | 3.333690000  |
| H  | -3.613172000 | 0.784006000  | 3.924191000  |
| C  | -3.637830000 | -1.092567000 | 1.957045000  |
| H  | -4.004090000 | -1.559584000 | 1.036637000  |
| H  | -4.353650000 | -1.299476000 | 2.762120000  |
| H  | -2.683633000 | -1.568443000 | 2.204614000  |
| C  | -4.839604000 | 1.037130000  | 1.446427000  |
| H  | -5.219686000 | 0.649167000  | 0.493663000  |
| H  | -4.793654000 | 2.129171000  | 1.370994000  |
| H  | -5.567815000 | 0.786923000  | 2.228501000  |
| C  | -1.363274000 | 4.012545000  | -1.042210000 |
| C  | -0.402246000 | 4.278804000  | -2.199925000 |
| H  | -0.701130000 | 3.728648000  | -3.098286000 |
| H  | 0.617239000  | 3.965875000  | -1.952068000 |
| H  | -0.392797000 | 5.350642000  | -2.433457000 |
| C  | -2.774599000 | 4.467054000  | -1.437557000 |
| H  | -3.141091000 | 3.900881000  | -2.302368000 |
| H  | -2.761553000 | 5.530329000  | -1.709693000 |
| H  | -3.494812000 | 4.337812000  | -0.621958000 |
| C  | -0.891532000 | 4.787252000  | 0.197268000  |
| H  | 0.111988000  | 4.465173000  | 0.503554000  |
| H  | -1.567090000 | 4.652447000  | 1.049770000  |
| H  | -0.843710000 | 5.860448000  | -0.028198000 |
| C  | 0.908940000  | 0.794151000  | 1.741476000  |
| H  | 0.437966000  | 1.713737000  | 1.393636000  |
| C  | 1.552254000  | 0.716901000  | 2.969462000  |
| H  | 1.603763000  | 1.587781000  | 3.618236000  |
| C  | 2.118685000  | -0.506925000 | 3.332205000  |
| H  | 2.638028000  | -0.612361000 | 4.283507000  |
| C  | 2.019072000  | -1.592435000 | 2.473529000  |
| H  | 2.461663000  | -2.546969000 | 2.744257000  |
| C  | 1.343037000  | -1.455345000 | 1.251172000  |
| C  | 1.148986000  | -2.518282000 | 0.257858000  |
| C  | 1.593568000  | -3.831297000 | 0.470989000  |
| H  | 2.103252000  | -4.102809000 | 1.394529000  |
| C  | 1.379407000  | -4.807825000 | -0.493468000 |
| H  | 1.723180000  | -5.826920000 | -0.324700000 |
| C  | 0.719036000  | -4.470808000 | -1.677764000 |
| H  | 0.550599000  | -5.231971000 | -2.439394000 |
| C  | 0.278999000  | -3.165842000 | -1.894373000 |
| H  | -0.225016000 | -2.923663000 | -2.828621000 |
| C  | 0.478485000  | -2.158884000 | -0.939303000 |

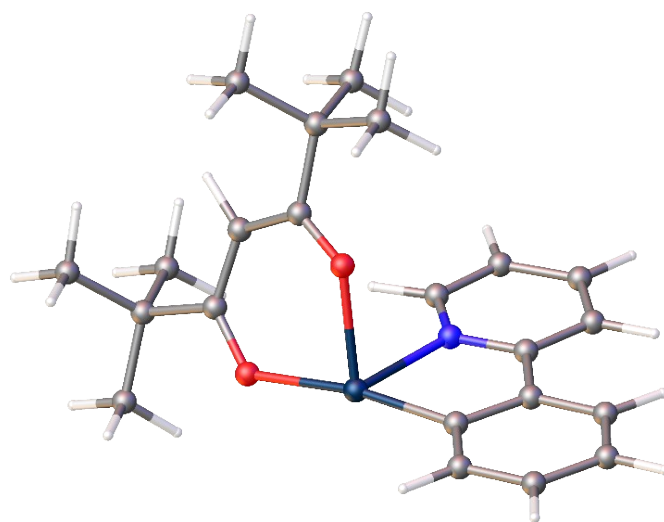



Cartesian coordinate for MECP ( $3 \cdot \text{Hg}_3$ ) (in Å)

|    |              |              |              |
|----|--------------|--------------|--------------|
| Hg | 26.968895000 | 12.208274000 | 10.138347000 |
| Hg | 29.297073000 | 11.303450000 | 7.539731000  |
| Hg | 30.501397000 | 12.015555000 | 10.860885000 |
| Pt | 26.412037000 | 9.307201000  | 10.095696000 |
| F  | 24.166512000 | 12.614325000 | 8.709991000  |
| F  | 23.296115000 | 12.115665000 | 6.220125000  |
| F  | 25.020886000 | 11.277971000 | 4.312252000  |
| F  | 27.628319000 | 10.964584000 | 4.887845000  |
| F  | 31.772329000 | 10.328096000 | 5.870794000  |
| F  | 34.374121000 | 10.004517000 | 6.468470000  |
| F  | 35.295315000 | 10.626416000 | 8.930588000  |
| F  | 33.612459000 | 11.553026000 | 10.814060000 |
| F  | 30.850184000 | 12.684788000 | 13.906512000 |
| F  | 29.106725000 | 13.308514000 | 15.860455000 |
| F  | 26.464802000 | 13.473593000 | 15.322751000 |
| F  | 25.552441000 | 13.019984000 | 12.835423000 |
| O  | 25.852773000 | 7.392061000  | 10.752535000 |
| O  | 24.489585000 | 9.998689000  | 10.543898000 |
| N  | 26.157515000 | 8.506034000  | 8.110425000  |
| C  | 26.376563000 | 11.995764000 | 8.140960000  |
| C  | 25.053877000 | 12.190238000 | 7.798660000  |
| C  | 24.582287000 | 11.956288000 | 6.517296000  |
| C  | 25.464570000 | 11.532933000 | 5.539428000  |
| C  | 26.800403000 | 11.367572000 | 5.866161000  |
| C  | 27.275179000 | 11.580862000 | 7.142454000  |
| C  | 31.304389000 | 11.136596000 | 8.041564000  |
| C  | 32.193534000 | 10.658284000 | 7.102654000  |
| C  | 33.537734000 | 10.478409000 | 7.384456000  |
| C  | 34.009635000 | 10.794371000 | 8.646672000  |
| C  | 33.122790000 | 11.275712000 | 9.595760000  |
| C  | 31.781754000 | 11.451272000 | 9.324663000  |
| C  | 29.110604000 | 12.519210000 | 12.316153000 |
| C  | 29.544697000 | 12.760536000 | 13.603723000 |
| C  | 28.669287000 | 13.083037000 | 14.627204000 |
| C  | 27.315653000 | 13.167356000 | 14.350721000 |
| C  | 26.872071000 | 12.928428000 | 13.060235000 |
| C  | 27.736029000 | 12.604748000 | 12.034720000 |
| C  | 24.670807000 | 7.069734000  | 11.087849000 |
| C  | 23.570236000 | 7.915604000  | 11.206031000 |
| H  | 22.654257000 | 7.459218000  | 11.534317000 |
| C  | 23.526175000 | 9.294424000  | 10.960975000 |
| C  | 24.539107000 | 5.569517000  | 11.368841000 |
| C  | 23.152552000 | 5.153579000  | 11.839740000 |
| H  | 22.386322000 | 5.357343000  | 11.088461000 |
| H  | 22.871308000 | 5.652156000  | 12.769922000 |
| H  | 23.149987000 | 4.077660000  | 12.028436000 |
| C  | 25.567423000 | 5.199835000  | 12.440296000 |
| H  | 26.574094000 | 5.469184000  | 12.122244000 |
| H  | 25.533834000 | 4.123820000  | 12.626595000 |
| H  | 25.354311000 | 5.713898000  | 13.380812000 |
| C  | 24.870790000 | 4.839488000  | 10.063748000 |
| H  | 25.870973000 | 5.101102000  | 9.718356000  |
| H  | 24.154764000 | 5.095025000  | 9.278089000  |
| H  | 24.826734000 | 3.759599000  | 10.223932000 |
| C  | 22.218603000 | 10.065511000 | 11.135414000 |
| C  | 21.673883000 | 10.320756000 | 9.724729000  |
| H  | 21.456535000 | 9.380060000  | 9.210994000  |
| H  | 22.386170000 | 10.894221000 | 9.131167000  |
| H  | 20.744439000 | 10.892090000 | 9.786650000  |
| C  | 21.172862000 | 9.314885000  | 11.951053000 |

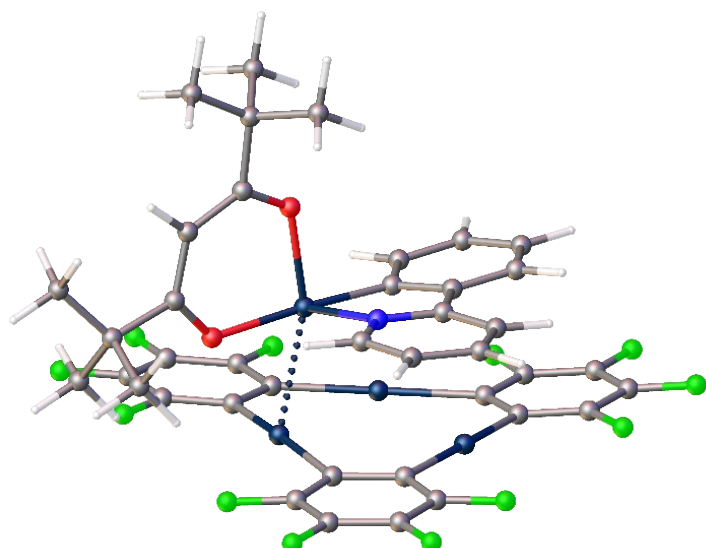



|   |              |              |              |
|---|--------------|--------------|--------------|
| H | 20.824088000 | 8.410309000  | 11.448070000 |
| H | 20.303369000 | 9.960090000  | 12.094776000 |
| H | 21.551450000 | 9.040204000  | 12.938115000 |
| C | 22.523706000 | 11.400937000 | 11.814249000 |
| H | 23.245875000 | 11.977856000 | 11.239916000 |
| H | 22.929776000 | 11.250199000 | 12.817199000 |
| H | 21.603648000 | 11.982823000 | 11.904024000 |
| C | 25.011170000 | 8.504653000  | 7.441504000  |
| H | 24.132252000 | 8.801967000  | 8.001513000  |
| C | 24.950184000 | 8.148441000  | 6.109834000  |
| H | 24.002753000 | 8.158798000  | 5.588033000  |
| C | 26.131301000 | 7.796549000  | 5.472113000  |
| H | 26.127758000 | 7.531197000  | 4.421943000  |
| C | 27.317774000 | 7.804495000  | 6.178018000  |
| H | 28.248074000 | 7.556149000  | 5.686065000  |
| C | 27.317669000 | 8.165602000  | 7.522396000  |
| C | 28.496007000 | 8.240710000  | 8.386658000  |
| C | 29.743885000 | 7.751498000  | 7.999317000  |
| H | 29.884509000 | 7.314985000  | 7.017180000  |
| C | 30.812079000 | 7.799513000  | 8.875837000  |
| H | 31.779764000 | 7.419685000  | 8.572473000  |
| C | 30.634254000 | 8.331553000  | 10.145250000 |
| H | 31.468882000 | 8.364399000  | 10.836736000 |
| C | 29.398153000 | 8.832718000  | 10.530914000 |
| H | 29.275138000 | 9.235954000  | 11.530762000 |
| C | 28.305246000 | 8.808314000  | 9.666151000  |

## References

1. A. Heil and C. M. Marian, *Inorganic Chemistry*, 2019, **58**, 6123-6136.
2. G. S. M. Tong, P. K. Chow, W.-P. To, W.-M. Kwok and C.-M. Che, *Chemistry – A European Journal*, 2014, **20**, 6433-6443.
